# Supplementary material for: DNA Probe Pulldown Screening Uncovers O-GlcNAcylation Modulation of Transcription Factor DNA Interactions
Source: Research Square preprint supplement (doi:10.21203/rs.3.rs-5779294/v1), 2025-04-14
Supplement: Supplementary file 1 [file a8e8d986ac1d6ca35df5defe.xlsx]

## Sheet: S1
TF	TFREs		Name	DNA sequence
AR	AGAACACATTGTTCT		catTFRE-1	TCCCCGAAAAGTGCCACCTGACGTCGATTGTTTACTTTGTCATGTTTACTTTGTCATGTTTACTTTGTCAGGTAAGTATCAGGTAAGTATCAGGTAAGTAATCACATGTGAGCAAAAGGCCAGCAAAA
ARNT	GGACGTGC		catTFRE-2	TCCCCGAAAAGTGCCACCTGACGTCGATAGATAGTCAAGATAGTCAAGATAGTCATGACGTCATCATGACGTCATCATGACGTCATCATGACGTCAATCACATGTGAGCAAAAGGCCAGCAAAA
BRCA1	ACAACAC		catTFRE-80	TCCCCGAAAAGTGCCACCTGACGTCGATTGACTCATCATGACTCATCAACAACACTCAACAACACTCATTTCGCAATTCATTTCGCAATTCATGACGTCATCATGACGTCATCATTTGGCGCTCATTTGGCGCTCAGAGCCGGAAGTCAGAGCCGGAAGTCAACCGGAAGTTCAACCGGAAGTTCAGGCCCAGGTCACCCTGACCTTCAGGCCCAGGTCACCCTGACCTTCATTTCCGTTTCCGTCAGGAAGGAAGGAAGGAAGGTCAGGAAGGAAGGAAGGAAGGTCACAGGAAATTCACAGGAAATTCATGTTTACTTTGTCATGTTTACTTTGTCAGGTAAGTATCAGGTAAGTATCAGTAAACATTCAGTAAACATTCACAAACGTAAACAATTC…
CEBPA	TTTCGCAAT		RS	TCACGACCGAAAAGATCAAGAGCAGCCCGCATGGATTTGACTTGGTCAGGGCCGAGCCTACATGTGCGAATGATGCCCATACTTGAGCCACCTAACTTTGTTTTAGGGCGACTGCCCTGCTGCGTAACATCGTTGCTGCTGCGTAACATCGTTGCTGCTCCATAACATCAAACATCGACCCACGGCGTAACGCGCTTGCTGCTTGGATGCCCGAGGCATAGACTGTACAAAAAAACAGTCATAACAAGCCATGAAAACCGCCACTGCGCCGTTACCACCGCTGCGTTCGGTCAAGGTTCTGGACCAGTTGCGTGAGCGCATACGCTACTTGCATTACAGTTTACGAACCGAACAGGCTTATGTCAACTGGGTTCGTGCCTTCATCCGTTTCCACGGTGT…
CREB1	TGACGTCA
E2F1	TTTGGCGC
E2F3	TTTGGCGC
E2F4	TTTGGCGC
E2F6	TTTGGCGC
E2F7	TTTGGCGC
ELK1	GAGCCGGAAG
ELK3	GAGCCGGAAG
ELK4	ACCGGAAGT
ESR1	GGCCCAGGTCACCCTGACCT
ESR2	GGCCCAGGTCACCCTGACCT
ETS1	TTTCCG
ETS2	TTTCCG
EWSR1	GGAAGGAAGGAAGGAAGG
FEV	CAGGAAAT
FLI1	CAGGAAAT
FOSL1	TGACTCA
FOSL2	TGACTCA
FOXA1	TGTTTACTTTG
FOXA2	TGTTTACTTTG
FOXA3	TGTTTACTTTG
FOXC1	GGTAAGTA
FOXC2	GGTAAGTA
FOXD1	GTAAACAT
FOXD2	GTAAACAT
FOXD3	GTAAACAT
FOXF2	CAAACGTAAACAAT
FOXI1	GGATGTTTGTTT
FOXL1	TATACATA
FOXO1	TGTAAACA
FOXO3	TGTAAACA
FOXO4	TGTAAACA
FOXO6	TGTAAACA
GATA1	GGATA
GATA2	GGATA
GATA3	AGATAG
GATA4	AGATAG
GATA5	AGATAG
GATA6	AGATAG
HIF1A	GGACGTGC
HINFP	CGTCCGC
HLF	GGTTACGTAATG
HNF1B	TTAATATTTAAC
HNF4A	AGGCCAAAGGTCA
HOXA1	CACTAATT
HOXA10	CACTAATT
HOXA2	CACTAATT
HOXA4	CACTAATT
HOXA5	CACTAATT
HOXA6	CACTAATT
HOXA7	CACTAATT
HOXA9	CACTAATT
INSM1	TGTCAGGGGGCG
IRF1	GAAAGTGAAACC
IRF2	GGAAAGTGAAAGCAAAAC
IRF3	GGAAAGTGAAAGCAAAAC
IRF4	GGAAAGTGAAAGCAAAAC
IRF5	GGAAAGTGAAAGCAAAAC
IRF6	GGAAAGTGAAAGCAAAAC
IRF7	GGAAAGTGAAAGCAAAAC
IRF8	GGAAAGTGAAAGCAAAAC
IRF9	GGAAAGTGAAAGCAAAAC
JUN	TTACTGACTCACCACAT
JUNB	TTACTGACTCACCACAT
JUND	CCCCTTTCTGACTCAC
MAX	GACCACGTTA
MEF2A	CTATTTATAG
MEF2B	CTATTTATAG
MEF2C	CTATTTATAG
MEF2D	CTATTTATAG
MYC	GAGCACGTGGT
MYF5	CAGCAGCTGCTG
MYF6	CAGCAGCTGCTG
MZF1	TGGGGA
NFATC2	TTTTCCA
NFATC3	TTTTCCA
NFE2L2	ATGACTCAGCA
NFIC	TTGGCA
NFIL3	TTATGTAACGT
NFKB1	GGGAATTTCC
NFKB2	GGGAATTTCC
NFYA	ACCAGCCAATCAGCG
NHLH1	CGCAGCTGCGT
NHLH2	CGCAGCTGCGT
NKX3-1	ATACTTA
NKX3-2	ATACTTA
NR1H2	AAAGGTCAAAGGTCAAC
NR1I2	TGAACTCAATGAACTC
NR2F1	TGACCTTTGAACCT
NR3C1	GGGAACATTATGTCCTGT
NR4A2	AAGGTCAC
PAX6	TTCACGCATGAGTT
PBX1	CCATCAATCAAA
PDX1	CTAATT
PGR	ACAAAATGT
PLAG1	GGGGCCCAAGGGGG
PLAGL2	GGGGCCCAAGGGGG
PPARG	GTAGGTCACGGTGACCTACT
RARA	TGGAAGGGCAGACCCAGGACACTCTCACCA
RARB	TGGAAGGGCAGACCCAGGACACTCTCACCA
RARG	TGGAAGGGCAGACCCAGGACACTCTCACCA
RELA	GGGAATTTCC
REST	TTCAGCACCATGGACAGCGCC
RFX1	CTTCACCCAGCAACAGATGAGGC
RFX2	CTTCACCCAGCAACAGATGAGGC
RFX3	CTTCACCCAGCAACAGATGAGGC
RFX4	CTTCACCCAGCAACAGATGAGGC
RFX5	CTTCACCCAGCAACAGATGAGGC
RFX7	CTTCACCCAGCAACAGATGAGGC
RFXANK	CTTCACCCAGCAACAGATGAGGC
RFXAP	CTTCACCCAGCAACAGATGAGGC
RORA	ATCAAGGTCA
RREB1	CCCCAAACCACCCACAACCA
RXRA	GGGTCATCGGGTTCA
SOX10	CTTTGT
SOX12	CTTTGT
SOX13	CTTTGT
SOX14	CTTTGT
SOX15	CTTTGT
SOX18	CTTTGT
SOX2	CTTTGT
SOX4	CTTTGT
SOX8	CTTTGT
SOX9	CTTTGT
SP1	CCCCGCCCCC
SP2	CCCCGCCCCC
SP3	CCCCGCCCCC
SP4	CCCCGCCCCC
SP5	CCCCGCCCCC
SP8	CCCCGCCCCC
SP9	CCCCGCCCCC
SPI1	AGGAAGT
SPIB	AGAGGAA
SRF	GCCCATATATGG
SRY	GTAAACAAT
STAT1	CATTTCCCGGAAACC
STAT2	CATTTCCCGGAAACC
STAT3	CATTTCCCGGAAACC
STAT5A	TTACCAGAAAAGG
TAL1	CCACCATCTGGT
TBP	GTATAAAAGGCGGGG
TCF3	CCACCATCTGGT
TCF4	CCACCATCTGGT
TEAD1	CACATTCCTCCG
TEAD2	CACATTCCTCCG
TEAD3	CACATTCCTCCG
TEAD4	CACATTCCTCCG
TFAP2A	GCCTTGGGC
TLX1	TGGCACCATGCCAA
TP53	CCGGACATGCCCGGGCATGT
USF1	CACGTGG
USF2	CACGTGG
VDR	GGGTCATCGGGTTCA
XBP1	ATGACG
YY1	GCCATC
YY2	GCCATC
ZNF354C	ATCCAC

## Sheet: S2
Input-NPs	catTFRE-80-NPs	Input-TFs/Co-factors	catTFRE-80-TFs/Co-factors
CDKN2A	TMPO	ARNT	AATF
TMPO	ARNT	BRCA1	ABL1
ARNT	BRCA1	CREB1	ABT1
BRCA1	CREB1	E2F3	ACTB
CREB1	E2F3	E2F6	ACTL6A
E2F3	E2F6	ELK1	ACTN1
E2F6	ELK1	ELK3	ACTN2
ELK1	ELK3	EWSR1	ACTN4
ELK3	EWSR1	FOSL2	ACTR5
EWSR1	FOSL2	FOXA1	ACTR6
FOSL2	FOXA1	FOXC1	ACTR8
FOXA1	FOXC1	FOXC2	ADNP
FOXC1	FOXC2	FOXF2	ADNP2
FOXC2	FOXF2	GATA2	AFF4
FOXF2	GATA2	GATA6	AGO2
GATA2	GATA6	IRF1	AHCTF1
GATA6	IRF1	IRF2	AHR
IRF1	IRF2	JUN	AIP
IRF2	JUN	JUNB	ALX4
JUN	JUNB	JUND	ALYREF
JUNB	JUND	MAX	ANP32A
JUND	MAX	MEF2A	ANP32B
MAX	MEF2A	MEF2C	ANP32E
MEF2A	MEF2C	MEF2D	ANXA4
MEF2C	MYC	MYC	APEX1
MEF2D	NFIC	NFIC	ARGLU1
MYC	NFIL3	NFIL3	ARID1A
NFIC	NFKB1	NFYA	ARID1B
NFIL3	NFYA	NR2F1	ARID2
NFKB1	NR2F1	NR4A2	ARID4A
NFYA	NR4A2	PBX1	ARID4B
NR2F1	PPARG	RARG	ARID5B
NR4A2	RARG	REST	ARNT
PBX1	REST	RFX1	ARRB1
PPARG	RFX1	RFX3	ARRB2
RARG	RFX3	RFX5	ASF1A
REST	RFX5	RFXAP	ASH1L
RFX1	RFXANK	RREB1	ASH2L
RFX3	RFXAP	RXRA	ATAD2
RFX5	RREB1	SP1	ATF1
RFXANK	RXRA	SP2	ATF2
RFXAP	SP1	SP3	ATF3
RREB1	SP3	SP4	ATF6
RXRA	SP4	STAT1	ATF7
SP1	STAT1	TBP	ATRX
SP2	TBP	TEAD1	AURKB
SP3	TEAD1	TEAD4	BACH1
SP4	TEAD4	USF1	BANP
STAT1	TFAP2A	USF2	BASP1
TBP	USF1	VDR	BAZ1A
TEAD1	YY1	AATF	BAZ1B
TEAD4	ACTR8	ABL1	BAZ2A
TFAP2A	AFF4	ACTL6A	BAZ2B
USF1	AHCTF1	AHCTF1	BBX
USF2	ALX4	ALX4	BCLAF1
VDR	ALYREF	ANP32B	BCOR
YY1	ANP32A	APEX1	BEND3
AATF	ANP32B	ARGLU1	BHLHE40
ABL1	ANP32E	ARID1A	BLM
ACTL6A	ARID1B	ARID1B	BMI1
ACTR8	ARID2	ARID2	BPTF
ADNP	ARID4A	ARRB1	BRCA1
AFF4	ARRB1	ARRB2	BRD1
AHCTF1	ARRB2	ASH2L	BRD2
ALX4	ASF1A	ATAD2	BRD3
ALYREF	ATF1	ATF2	BRD4
ANP32A	ATF3	ATRX	BRD7
ANP32B	ATRX	AURKB	BRD8
ANP32E	AURKB	BACH1	BRMS1
APEX1	BACH1	BANP	BRMS1L
ARGLU1	BANP	BAZ2A	BTAF1
ARID1A	BAZ1B	BAZ2B	BTF3
ARID1B	BAZ2A	BBX	BUD31
ARID2	BAZ2B	BCLAF1	C1D
ARID4A	BBX	BCOR	C1QBP
ARRB1	BCLAF1	BEND3	CALR
ARRB2	BCOR	BMI1	CAMK2D
ASF1A	BHLHE40	BPTF	CARHSP1
ASH2L	BMI1	BRD1	CASP8AP2
ATAD2	BPTF	BRD2	CASZ1
ATF1	BRD2	BRD3	CAVIN1
ATF2	BRD3	BRD4	CBFB
ATF3	BRMS1L	BRD8	CBX2
ATRX	BUD31	BRMS1L	CBX3
AURKB	C1D	BTAF1	CBX4
BACH1	CASP8AP2	BUD31	CBX5
BANP	CASZ1	C1D	CBX8
BAZ1B	CBX2	CASZ1	CC2D1A
BAZ2A	CBX3	CBX2	CCAR1
BAZ2B	CBX4	CBX3	CCAR2
BBX	CBX5	CCAR1	CCDC59
BCLAF1	CBX8	CCAR2	CCNA2
BCOR	CCAR1	CCDC59	CCNC
BEND3	CCAR2	CCNH	CCNH
BHLHE40	CCNC	CCNK	CCNK
BLM	CCNH	CCNT1	CCNT1
BMI1	CCNK	CDC5L	CDC5L
BPTF	CCNT1	CDC73	CDC73
BRD1	CDC5L	CDK2	CDK1
BRD2	CDC73	CDK5	CDK2
BRD3	CDK2	CDK8	CDK5
BRD4	CDK7	CDK9	CDK5RAP3
BRD8	CDK8	CDX2	CDK7
BRMS1L	CDYL	CDYL	CDK8
BTAF1	CEBPB	CEBPB	CDK9
BUD31	CEBPD	CEBPD	CDX2
C1D	CEBPG	CENPB	CDYL
CASP8AP2	CENPB	CENPF	CEBPB
CASZ1	CENPF	CGGBP1	CEBPD
CBX2	CGGBP1	CHAF1B	CEBPG
CBX3	CHD1L	CHD1L	CEBPZ
CBX4	CHD3	CHD3	CENPB
CBX5	CHD7	CHD4	CENPF
CBX8	CLOCK	CHD6	CENPU
CCAR1	CNBP	CHD8	CEP290
CCAR2	CREB5	CLOCK	CGGBP1
CCDC59	CTBP1	CNOT2	CHAF1B
CCNC	CTBP2	COPS5	CHCHD2
CCNH	CTCF	CREB5	CHCHD3
CCNK	CTR9	CTBP1	CHD1L
CCNT1	CXXC1	CTCF	CHD3
CDC5L	CXXC5	CXXC5	CHD4
CDC73	DDX1	DCAF1	CHD6
CDK2	DDX20	DDX20	CHD7
CDK5	DDX39B	DDX39B	CHD8
CDK7	DEK	DDX5	CHTOP
CDK8	DHX9	DHX33	CIZ1
CDK9	DLX3	DHX9	CLOCK
CDX2	DMAP1	DLX1	CLU
CDYL	DNMT1	DMAP1	CNBP
CEBPB	DNTTIP2	DNAJB1	CNOT1
CEBPD	EED	DNMT1	CNOT2
CEBPG	EGR1	DNTTIP2	CNOT9
CENPB	EHMT1	DPY30	COPS2
CENPF	EHMT2	DR1	COPS5
CGGBP1	ELF1	EED	CREB1
CHAF1B	ELF2	EGR1	CREB3L2
CHD1L	ELL	EHMT1	CREB5
CHD3	EMSY	ELF2	CSDE1
CHD4	EP300	ELL	CSNK2A2
CHD6	EPC2	EP300	CTBP1
CHD7	ERBIN	EPC1	CTBP2
CHD8	ERCC2	EPC2	CTCF
CHTOP	ERCC3	ERBIN	CTNNB1
CIZ1	ESF1	ERCC3	CTNND1
CLOCK	ETV3	ESF1	CTR9
CNBP	ETV6	ETV3	CUX1
CNOT2	EYA1	FGF2	CXXC1
COPS5	EYA3	FIZ1	CXXC5
CREB5	EZH2	FOS	DAPK3
CTBP1	FGF2	FOXK1	DCAF1
CTBP2	FOS	FOXK2	DDX1
CTCF	FOXK1	FOXP1	DDX17
CTR9	FOXK2	FOXP4	DDX20
CXXC1	FOXP1	GABPA	DDX39B
CXXC5	FOXP4	GABPB1	DDX5
DCAF1	FUS	GABPB2	DDX54
DDX1	GABPA	GATAD1	DEK
DDX17	GABPB1	GATAD2A	DHX33
DDX20	GABPB2	GATAD2B	DHX36
DDX39B	GATAD1	GLI3	DHX9
DDX5	GATAD2B	GNL3	DLX1
DEK	GLI3	GTF2A2	DLX3
DHX33	GMEB2	GTF2B	DMAP1
DHX36	GNL3	GTF2E1	DNAJA3
DHX9	GON4L	GTF2F1	DNAJB1
DLX1	GPS2	GTF2H1	DNAJC2
DLX3	GSK3B	GTF2H2	DNMT1
DMAP1	GTF2A1	GTF2H3	DNTTIP2
DNAJB1	GTF2A2	GTF2H4	DPF2
DNMT1	GTF2E1	GTF2I	DPY30
DNTTIP2	GTF2F1	GTF2IRD1	DR1
DPF2	GTF2H1	GZF1	DRAP1
DPY30	GTF2H2	H1-2	E2F3
DR1	GTF2H3	H1-4	E2F6
EED	GTF2H4	H1-5	EDF1
EGR1	GTF2I	HAT1	EED
EHMT1	GTF2IRD1	HCFC1	EGR1
EHMT2	GZF1	HCFC2	EHMT1
ELF1	H1-2	HDAC1	EHMT2
ELF2	H1-4	HDAC2	ELANE
ELL	HAT1	HDAC3	ELF1
EMSY	HCFC1	HEATR1	ELF2
EP300	HCFC2	HELLS	ELK1
EP400	HDAC1	HIC2	ELK3
EPC1	HDAC2	HIRA	ELL
EPC2	HDAC3	HIVEP1	ELOB
ERBIN	HDGF	HLTF	ELOC
ERCC2	HELLS	HMG20A	ELOF1
ERCC3	HIC2	HMG20B	ELP3
ESF1	HIVEP1	HMGA1	EMSY
ETV3	HLTF	HMGA2	ENO1
ETV6	HMG20A	HMGB1	ENY2
EYA1	HMG20B	HMGB2	EP300
EYA3	HMGA1	HMGB3	EP400
EZH2	HMGB1	HMGXB4	EPC1
FGF2	HMGB2	HNRNPC	EPC2
FIZ1	HMGXB3	HNRNPD	ERBIN
FOS	HMGXB4	HNRNPK	ERCC2
FOXK1	HNRNPD	HNRNPU	ERCC3
FOXK2	HNRNPU	HOMEZ	ESF1
FOXP1	HOMEZ	HOXA11	ESRRA
FOXP4	HOXC10	HOXC10	ETV3
FUS	HOXC5	HOXC5	ETV6
GABPA	HOXC9	HSPA8	EWSR1
GABPB1	HSPA8	HTATSF1	EYA1
GABPB2	HTATSF1	ICE1	EYA3
GATAD1	ICE1	ICE2	EZH2
GATAD2A	ICE2	IKZF5	EZR
GATAD2B	IKZF5	ILF2	FGF2
GLI3	ILF2	ING1	FHL2
GMEB2	ING1	ING3	FHOD1
GNL3	ING3	INO80B	FIZ1
GON4L	INO80C	INO80C	FLII
GPS2	INO80E	ITCH	FLNA
GSK3B	ITCH	JDP2	FOS
GTF2A1	JDP2	JMJD1C	FOSL2
GTF2A2	JMJD1C	KAT2B	FOXA1
GTF2B	KAT2B	KAT6B	FOXC1
GTF2E1	KAT5	KAT8	FOXC2
GTF2F1	KAT6B	KCTD1	FOXF2
GTF2H1	KCTD1	KDM1B	FOXK1
GTF2H2	KDM1A	KDM2A	FOXK2
GTF2H3	KDM1B	KDM2B	FOXP1
GTF2H4	KDM2B	KDM4B	FOXP4
GTF2I	KDM3A	KDM5A	FUS
GTF2IRD1	KDM6A	KDM6A	GABPA
GZF1	KHSRP	KHSRP	GABPB1
H1-2	KLF12	KLF12	GABPB2
H1-4	KLF16	KLF16	GATA2
H1-5	KLF3	KLF3	GATA6
HAT1	KLF4	KLF5	GATAD1
HCFC1	KLF5	KMT2B	GATAD2A
HCFC2	KMT2A	KMT2C	GATAD2B
HDAC1	KMT2B	KMT5B	GLI3
HDAC2	KMT2C	L3MBTL2	GMEB2
HDAC3	KMT5A	LCOR	GNL3
HDGF	KMT5B	LDB1	GON4L
HEATR1	L3MBTL2	LEO1	GPS2
HELLS	LCOR	LIN9	GRHPR
HIC2	LDB1	LRIF1	GSK3B
HIRA	LEO1	LYAR	GTF2A1
HIVEP1	LIN9	MAD2L2	GTF2A2
HLTF	LRIF1	MAFF	GTF2B
HMG20A	LYAR	MAFK	GTF2E1
HMG20B	MAD2L2	MBD1	GTF2F1
HMGA1	MAFK	MBD2	GTF2H1
HMGA2	MAZ	MBD3	GTF2H2
HMGB1	MBD1	MBD4	GTF2H3
HMGB2	MBD2	MBTD1	GTF2H4
HMGB3	MBD3	MCRS1	GTF2I
HMGXB3	MBD4	MED1	GTF2IRD1
HMGXB4	MBTD1	MED10	GZF1
HNRNPC	MCRS1	MED11	H1-2
HNRNPD	MECP2	MED12	H1-3
HNRNPK	MED1	MED13	H1-4
HNRNPU	MED10	MED14	H1-5
HOMEZ	MED11	MED16	HAT1
HOXA11	MED12	MED17	HCFC1
HOXC10	MED13	MED23	HCFC2
HOXC5	MED15	MED26	HDAC1
HOXC9	MED16	MED28	HDAC2
HSPA8	MED17	MED29	HDAC3
HTATSF1	MED18	MED30	HDGF
ICE1	MED23	MED31	HEATR1
ICE2	MED25	MED4	HELLS
IKZF5	MED26	MED6	HIC2
ILF2	MED27	MED7	HIRA
ING1	MED28	MED8	HIVEP1
ING3	MED29	MEIS1	HLTF
INO80B	MED30	MEN1	HMG20A
INO80C	MED31	MGA	HMG20B
INO80E	MED4	MIDEAS	HMGA1
ITCH	MED6	MIER1	HMGA2
JDP2	MED7	MLLT1	HMGB1
JMJD1C	MIDEAS	MLLT10	HMGB2
KAT2B	MIER1	MLLT6	HMGB3
KAT5	MIS18BP1	MLX	HMGXB3
KAT6B	MLLT1	MORF4L1	HMGXB4
KAT8	MLLT10	MORF4L2	HMOX1
KCTD1	MNAT1	MPHOSPH8	HNRNPC
KDM1A	MNT	MRGBP	HNRNPD
KDM1B	MORF4L2	MRTFA	HNRNPK
KDM2A	MPHOSPH8	MRTFB	HNRNPU
KDM2B	MRGBP	MSL3	HOMEZ
KDM3A	MRTFA	MTA1	HOXA11
KDM4B	MRTFB	MTA2	HOXA5
KDM4D	MSL3	MTA3	HOXC10
KDM5A	MTA1	MTF2	HOXC13
KDM6A	MTA2	MXI1	HOXC5
KHSRP	MTA3	MYBBP1A	HOXC9
KLF12	MTF2	MYBL1	HSPA8
KLF16	MXI1	MYOD1	HTATIP2
KLF3	MYBBP1A	NCL	HTATSF1
KLF4	MYBL1	NCOA6	ICE1
KLF5	MYOD1	NCOR1	ICE2
KMT2A	NCL	NELFA	IKZF5
KMT2B	NCOA6	NELFB	ILF2
KMT2C	NELFA	NELFCD	ILK
KMT5A	NELFB	NELFE	ING1
KMT5B	NELFCD	NFAT5	ING3
L3MBTL2	NELFE	NFIA	INO80B
LCOR	NFAT5	NFIB	INO80C
LDB1	NFIA	NFIX	INO80E
LEO1	NFIB	NFRKB	IRF1
LIN9	NFIX	NFYB	IRF2
LRIF1	NFYB	NIPBL	ISL2
LYAR	NIPBL	NKRF	ITCH
MAD2L2	NKX2-5	NKX2-5	JARID2
MAFF	NOL11	NOL11	JDP2
MAFK	NPAS2	NPAT	JMJD1C
MAZ	NPAT	NPM1	JUN
MBD1	NPM1	NR0B2	JUNB
MBD2	NR0B2	NR2C1	JUND
MBD3	NR2C1	NR2C2	JUP
MBD4	NR2C2	NR2F2	KAT2A
MBTD1	NR2F2	NR2F6	KAT2B
MCRS1	NR2F6	NR4A1	KAT5
MECP2	NSD1	NRF1	KAT6B
MED1	NUP62	NSD1	KAT8
MED10	OGT	NSD2	KCTD1
MED11	ORC2	NUP62	KDM1A
MED12	PAF1	ORC2	KDM1B
MED13	PATZ1	PAF1	KDM2A
MED14	PBRM1	PATZ1	KDM2B
MED15	PBX2	PAXBP1	KDM3A
MED16	PBX3	PAXIP1	KDM4B
MED17	PCGF1	PBRM1	KDM4D
MED18	PDCD4	PBX3	KDM5A
MED19	PELP1	PCBD1	KDM6A
MED23	PHF1	PCGF1	KHSRP
MED25	PHF10	PCGF5	KLF10
MED26	PHF2	PELP1	KLF12
MED27	PHF21A	PHF10	KLF13
MED28	PHF5A	PHF2	KLF16
MED29	PHF8	PHF20	KLF3
MED30	PHIP	PHF21A	KLF4
MED31	PINX1	PHF8	KLF5
MED4	PLRG1	PIAS2	KMT2A
MED6	PML	PINX1	KMT2B
MED7	POLR2A	PITX1	KMT2C
MED8	POLR3F	PKNOX1	KMT2D
MEIS1	POU2F1	PLRG1	KMT5A
MEN1	PPHLN1	PML	KMT5B
MGA	PPIE	POLR3C	L3MBTL2
MIDEAS	PQBP1	POLR3F	LCOR
MIER1	PRDM1	POU2F1	LDB1
MIS18BP1	PRDM10	PPHLN1	LEO1
MLLT1	PRDM15	PPIE	LIN54
MLLT10	PRMT1	PQBP1	LIN9
MLLT6	PRPF6	PRDM1	LRIF1
MLX	PSIP1	PRDM10	LRPPRC
MNAT1	PSPC1	PRMT1	LRRFIP2
MNT	PUF60	PSIP1	LTF
MORF4L1	PURB	PSPC1	LYAR
MORF4L2	RAD21	PUF60	MAD2L2
MPHOSPH8	RAI1	PURB	MAFF
MRGBP	RALY	RAD21	MAFG
MRTFA	RAN	RAI1	MAFK
MRTFB	RB1	RAN	MAX
MSL3	RBBP4	RB1	MAZ
MTA1	RBBP7	RBBP4	MBD1
MTA2	RBM14	RBBP5	MBD2
MTA3	RBM15	RBBP7	MBD3
MTF2	RBM15B	RBM15	MBD4
MXI1	RBM39	RBMX	MBTD1
MYBBP1A	RBX1	RCOR1	MCRS1
MYBL1	RCOR1	RCOR2	MECP2
MYBL2	RECQL5	RCOR3	MED1
MYOD1	REPIN1	RECQL5	MED10
NCL	REXO4	REPIN1	MED11
NCOA6	RING1	REXO4	MED12
NCOR1	RLF	RING1	MED13
NELFA	RLIM	RLF	MED14
NELFB	RNF2	RLIM	MED15
NELFCD	RNF20	RNF2	MED16
NELFE	RPRD1B	RNF20	MED17
NFAT5	RRN3	RPRD1B	MED18
NFIA	RUNX1	RRN3	MED19
NFIB	RUNX2	RUNX1	MED20
NFIX	RUNX3	RUNX2	MED23
NFRKB	RXRB	RUNX3	MED24
NFXL1	RYBP	RXRB	MED25
NFYB	SAFB	RYBP	MED26
NFYC	SAFB2	SAFB	MED27
NIPBL	SAP30	SAP130	MED28
NKRF	SAP30BP	SAP18	MED29
NKX2-5	SCAI	SAP30BP	MED30
NOL11	SCMH1	SCAI	MED31
NONO	SENP1	SCMH1	MED4
NPAS2	SETD1A	SENP1	MED6
NPAT	SF1	SETD1A	MED7
NPM1	SFPQ	SF1	MED8
NR0B2	SFSWAP	SFSWAP	MEF2A
NR2C1	SIN3A	SGF29	MEF2C
NR2C2	SIN3B	SIN3A	MEF2D
NR2F2	SIRT7	SIN3B	MEIS1
NR2F6	SIX2	SIRT7	MEN1
NR4A1	SIX4	SIX2	MGA
NRF1	SKI	SKIL	MIDEAS
NSD1	SLTM	SLTM	MIER1
NSD2	SMARCA2	SMARCA2	MIS18BP1
NUP62	SMARCB1	SMARCA4	MITF
OGT	SMARCC2	SMARCA5	MLLT1
ORC2	SMARCD1	SMARCB1	MLLT10
PAF1	SMARCD2	SMARCC2	MLLT6
PARP12	SMARCE1	SMARCD1	MLX
PATZ1	SNAI1	SMARCD2	MLXIP
PAXBP1	SNAPC2	SMARCE1	MNAT1
PAXIP1	SNW1	SNAI1	MNT
PBRM1	SON	SNAPC2	MORF4L1
PBX2	SP100	SNIP1	MORF4L2
PBX3	SP110	SNW1	MPHOSPH8
PCBD1	SP140L	SON	MRGBP
PCGF1	SPEN	SP100	MRTFA
PCGF5	SRCAP	SP110	MRTFB
PDCD4	SRFBP1	SPEN	MSL3
PELP1	SS18	SRCAP	MTA1
PHF1	SSBP3	SSBP3	MTA2
PHF10	SUB1	SUB1	MTA3
PHF12	SUMO1	SUMO1	MTDH
PHF2	SUPT16H	SUPT16H	MTF2
PHF20	SUPT20H	SUPT20H	MUC1
PHF21A	SUPT3H	SUPT3H	MXD4
PHF5A	SUPT5H	SUPT5H	MXI1
PHF8	SUPT7L	SUZ12	MYBBP1A
PHIP	SUZ12	TADA1	MYBL1
PIAS2	TADA1	TADA2A	MYBL2
PIAS4	TADA2A	TADA2B	MYC
PINX1	TADA2B	TADA3	MYOD1
PITX1	TADA3	TAF1	NAA15
PKNOX1	TAF1	TAF11	NAB2
PLRG1	TAF10	TAF15	NCL
PML	TAF11	TAF4	NCOA6
POLR2A	TAF15	TAF4B	NCOR1
POLR3C	TAF5	TAF7	NDUFA13
POLR3F	TAF5L	TAF9	NELFA
POU2F1	TAF6	TAF9B	NELFB
PPHLN1	TAF9	TASOR	NELFCD
PPIE	TAF9B	TBL1X	NELFE
PQBP1	TASOR	TBL1XR1	NFAT5
PRDM1	TBL1X	TBX3	NFATC3
PRDM10	TBL1XR1	TCEA1	NFIA
PRDM15	TCEA1	TCERG1	NFIB
PRMT1	TCERG1	TCF12	NFIC
PRPF6	TCF12	TCF20	NFIL3
PSIP1	TCF20	TCF7L2	NFIX
PSPC1	TCF7L2	TDP2	NFKB1
PUF60	TERF2	TERF2	NFKB2
PURB	TERF2IP	TERF2IP	NFRKB
RAD21	TFAP2C	TFCP2	NFXL1
RAI1	TFCP2	TFDP1	NFYA
RALY	THAP1	TFDP2	NFYB
RAN	THAP11	TGIF1	NFYC
RB1	THRAP3	THAP1	NIBAN2
RBBP4	TLE3	THAP11	NIPBL
RBBP5	TOP1	THOC5	NKRF
RBBP7	TOX4	THRAP3	NKX2-5
RBM14	TPR	THYN1	NME2
RBM15	TRERF1	TLE3	NOC2L
RBM15B	TRIM27	TOP1	NOL11
RBM39	TRIM28	TOX4	NONO
RBMX	TRPS1	TP53BP1	NPAS2
RBPJ	TRRAP	TRERF1	NPAT
RBX1	TTF1	TRIM28	NPM1
RCOR1	TWIST2	TRPS1	NPM3
RCOR2	UBTF	TRRAP	NR0B2
RCOR3	VEZF1	TWIST2	NR2C1
RECQL5	WAC	UBP1	NR2C2
REPIN1	WDR5	UTP4	NR2F1
REXO4	WIZ	WAC	NR2F2
RING1	XRN2	WDHD1	NR2F6
RLF	YAF2	WDR5	NR3C1
RLIM	YEATS2	WIZ	NR4A1
RNF2	YEATS4	XRCC6	NR4A2
RNF20	ZBED4	YEATS2	NR4A3
RPRD1B	ZBED6	YEATS4	NRF1
RRN3	ZBTB11	ZBED4	NSD1
RUNX1	ZBTB21	ZBTB1	NSD2
RUNX2	ZBTB24	ZBTB21	NSD3
RUNX3	ZBTB38	ZBTB38	NUDT5
RXRB	ZBTB4	ZBTB4	NUP62
RYBP	ZBTB40	ZBTB48	NUP98
SAFB	ZBTB48	ZBTB7B	OGT
SAFB2	ZBTB7B	ZFP37	ORC2
SAP130	ZFP37	ZFP64	PA2G4
SAP18	ZFP91	ZFP91	PAF1
SAP30	ZFX	ZHX1	PARK7
SAP30BP	ZGPAT	ZHX2	PARP12
SCAI	ZHX1	ZIC2	PATZ1
SCMH1	ZHX2	ZKSCAN4	PAWR
SENP1	ZHX3	ZKSCAN8	PAXBP1
SETD1A	ZIC2	ZMYND11	PAXIP1
SF1	ZKSCAN1	ZNF131	PBRM1
SFPQ	ZKSCAN4	ZNF142	PBX1
SFSWAP	ZKSCAN8	ZNF143	PBX2
SGF29	ZMYND11	ZNF148	PBX3
SIN3A	ZMYND8	ZNF174	PCBD1
SIN3B	ZNF142	ZNF184	PCGF1
SIRT6	ZNF143	ZNF207	PCGF5
SIRT7	ZNF146	ZNF217	PCGF6
SIX2	ZNF148	ZNF22	PDCD4
SIX4	ZNF207	ZNF24	PDLIM1
SKI	ZNF217	ZNF280C	PELP1
SKIL	ZNF219	ZNF281	PHF1
SLTM	ZNF24	ZNF3	PHF10
SMARCA2	ZNF280C	ZNF317	PHF12
SMARCA4	ZNF281	ZNF320	PHF2
SMARCA5	ZNF292	ZNF326	PHF20
SMARCB1	ZNF3	ZNF341	PHF21A
SMARCC1	ZNF317	ZNF35	PHF5A
SMARCC2	ZNF318	ZNF350	PHF8
SMARCD1	ZNF326	ZNF362	PHIP
SMARCD2	ZNF341	ZNF384	PIAS1
SMARCE1	ZNF35	ZNF414	PIAS2
SNAI1	ZNF350	ZNF444	PIAS4
SNAPC2	ZNF362	ZNF451	PICALM
SNIP1	ZNF384	ZNF460	PINX1
SNW1	ZNF414	ZNF512	PITX1
SON	ZNF444	ZNF512B	PKNOX1
SP100	ZNF460	ZNF516	PLK1
SP110	ZNF609	ZNF532	PLRG1
SP140L	ZNF627	ZNF581	PML
SPEN	ZNF638	ZNF592	POLR2A
SRCAP	ZNF768	ZNF593	POLR3C
SRFBP1	ZSCAN25	ZNF609	POLR3F
SRSF2	ZXDC	ZNF627	POU2F1
SS18	AKAP17A	ZNF629	PPARD
SSBP3	ANAPC5	ZNF639	PPARG
SUB1	AP3B1	ZNF652	PPHLN1
SUMO1	APTX	ZNF664	PPID
SUPT16H	ARB2A	ZNF668	PPIE
SUPT20H	ATAD1	ZNF689	PQBP1
SUPT3H	ATRIP	ZNF691	PRDM1
SUPT5H	BAP1	ZNF740	PRDM10
SUPT7L	BCCIP	ZNF768	PRDM15
SUZ12	BCORL1	ZNF771	PRDM2
TADA1	BLTP3B	ZNF777	PRDX5
TADA2A	BOD1L1	ZNF787	PREB
TADA2B	BOP1	ZSCAN25	PRMT1
TADA3	BRCC3	ZSCAN26	PRMT5
TAF1	BRD9	ZSCAN29	PRNP
TAF10	BRK1	ZXDC	PRPF6
TAF11	BUB3	ZZZ3	PSIP1
TAF15	BUD23	HOXA5	PSPC1
TAF4	C18orf21	NFATC3	PUF60
TAF4B	CAPG	NFKB2	PURA
TAF5	CC2D1B	RELA	PURB
TAF5L	CD2BP2	STAT3	RAD21
TAF6	CD70	TEAD3	RAF1
TAF6L	CDA	ABT1	RAI1
TAF7	CDC27	ACTB	RALY
TAF8	CDCA2	ACTN1	RAN
TAF9	CDCA5	ACTN2	RARG
TAF9B	CDIPT	ACTR6	RB1
TASOR	CDK11B	AHR	RBBP4
TBL1X	CENPI	ARID4B	RBBP5
TBL1XR1	CENPN	ARID5B	RBBP7
TBX3	CENPP	ATF6	RBM14
TCEA1	CGAS	ATF7	RBM15
TCERG1	CIRBP	BAZ1A	RBM15B
TCF12	COIL	BRD7	RBM39
TCF20	CPA4	BRMS1	RBMX
TCF7L2	CPSF4	BTF3	RBPJ
TDP2	CPSF6	C1QBP	RBX1
TERF2	CPSF7	CAMK2D	RCOR1
TERF2IP	CSTF2	CARHSP1	RCOR2
TFAP2C	CSTF3	CAVIN1	RCOR3
TFCP2	CUL1	CDK5RAP3	RECQL5
TFDP1	CUL4A	CEBPZ	REL
TFDP2	CWC22	CENPU	RELA
TGIF1	CYRIB	CHCHD2	REPIN1
THAP1	CYSRT1	CHCHD3	REST
THAP11	DCAKD	CLU	REXO4
THOC5	DCLRE1A	CNOT9	RFX1
THRAP3	DDA1	COPS2	RFX2
THYN1	DDB1	CREB3L2	RFX3
TLE3	DDX10	CSDE1	RFX5
TOP1	DDX19A	CSNK2A2	RFXANK
TOX4	DDX31	CTNNB1	RFXAP
TP53BP1	DDX41	CUX1	RHOA
TPR	DDX46	DAPK3	RING1
TRERF1	DDX51	DNAJA3	RLF
TRIM27	DDX52	DNAJC2	RLIM
TRIM28	DDX56	DRAP1	RNF2
TRIP13	DENND2B	EDF1	RNF20
TRPS1	DERA	ELANE	RPRD1A
TRRAP	DHX35	ELOB	RPRD1B
TTF1	DHX8	ELOC	RREB1
TWIST2	DIDO1	ELOF1	RRN3
UBP1	DIMT1	ELP3	RUNX1
UBTF	DIS3	ENO1	RUNX2
UTP4	DLG3	ESRRA	RUNX3
VEZF1	DNAJC8	FLII	RUVBL1
WAC	DNAJC9	FLNA	RUVBL2
WDHD1	DUSP23	GRHPR	RXRA
WDR5	DYNLT1	H1-3	RXRB
WIZ	ECPAS	HMOX1	RYBP
XRCC6	EIF6	HOXC13	S100A8
XRN2	EME1	HTATIP2	S100A9
YAF2	EPOP	ILK	SAFB
YEATS2	ERGIC1	ISL2	SAFB2
YEATS4	EXOSC2	JARID2	SAP130
ZBED4	EXOSC3	JUP	SAP18
ZBED6	EXOSC5	KAT2A	SAP30
ZBTB1	FAM50A	KLF10	SAP30BP
ZBTB11	FAM76B	LIN54	SCAI
ZBTB21	FAM83A	LRPPRC	SCMH1
ZBTB24	FANCD2	LRRFIP2	SENP1
ZBTB38	FANCF	LTF	SETD1A
ZBTB4	FANCI	MED24	SF1
ZBTB40	FANCL	MITF	SFPQ
ZBTB48	FANCM	MLXIP	SFSWAP
ZBTB7A	FARSB	MTDH	SGF29
ZBTB7B	FBXL18	MUC1	SIN3A
ZFP37	FBXO11	MXD4	SIN3B
ZFP64	FBXO28	NAA15	SIRT6
ZFP91	FBXO31	NAB2	SIRT7
ZFX	FBXO46	NDUFA13	SIX2
ZGPAT	FEN1	NME2	SIX4
ZHX1	FLYWCH1	NOC2L	SKI
ZHX2	FMN1	NPM3	SKIL
ZHX3	FTSJ3	NR4A3	SLTM
ZIC2	FUBP1	NSD3	SMAD1
ZKSCAN1	FUBP3	NUDT5	SMAD2
ZKSCAN4	GFPT1	NUP98	SMAD4
ZKSCAN8	GLE1	PA2G4	SMARCA2
ZMYND11	GNL2	PAWR	SMARCA4
ZMYND8	GPATCH11	PCGF6	SMARCA5
ZNF131	GSK3A	PDLIM1	SMARCB1
ZNF142	GSS	PIAS1	SMARCC1
ZNF143	GTF3C2	PICALM	SMARCC2
ZNF146	GTPBP4	PLK1	SMARCD1
ZNF148	H1-1	PPARD	SMARCD2
ZNF174	HASPIN	PPID	SMARCE1
ZNF184	HMGN3	PRDM2	SNAI1
ZNF207	HNRNPF	PRDX5	SNAPC2
ZNF217	HNRNPUL2	PRMT5	SND1
ZNF219	HPSE	PRNP	SNIP1
ZNF22	INTS13	PURA	SNW1
ZNF24	INTS7	RPRD1A	SON
ZNF280C	INTS8	RUVBL1	SP1
ZNF281	IPO5	RUVBL2	SP100
ZNF292	ISG20L2	S100A8	SP110
ZNF3	IWS1	S100A9	SP140L
ZNF317	KANSL1	SMAD1	SP2
ZNF318	KAT7	SMAD2	SP3
ZNF320	KCTD14	SMAD4	SP4
ZNF326	KHDC4	SND1	SPEN
ZNF341	KPNA1	SQSTM1	SQSTM1
ZNF35	KRR1	SSRP1	SRCAP
ZNF350	LSM10	SSU72	SRFBP1
ZNF362	LSM2	STAT6	SRSF2
ZNF384	MACROD1	STRAP	SS18
ZNF414	MAK16	SUDS3	SSBP3
ZNF444	MAP2K6	SUPT6H	SSRP1
ZNF45	MATR3	TAF2	SSU72
ZNF451	MAU2	TFAM	STAT1
ZNF460	MDC1	TFAP4	STAT3
ZNF462	MKI67	TFB1M	STAT6
ZNF512	MLH1	TFB2M	STRAP
ZNF512B	MORC2	TFE3	SUB1
ZNF516	MRE11	TFEB	SUDS3
ZNF532	NCAPD3	THAP4	SUMO1
ZNF579	NCAPG2	TOP1MT	SUPT16H
ZNF581	NCAPH2	TRIM29	SUPT20H
ZNF592	NHEJ1	TRIM33	SUPT3H
ZNF593	NIFK	TRIP6	SUPT5H
ZNF609	NLE1	TTF2	SUPT6H
ZNF623	NOC3L	TXLNG	SUPT7L
ZNF627	NOL10	TXN	SUZ12
ZNF629	NOL4L	UFL1	TADA1
ZNF638	NOL8	WBP2	TADA2A
ZNF639	NOP58	YBX1	TADA2B
ZNF652	NUP188	ZBED1	TADA3
ZNF664	NUP37	ZBTB2	TAF1
ZNF668	NUP85	ZBTB33	TAF10
ZNF687	NUP88	ZBTB41	TAF11
ZNF689	OARD1	ZFP3	TAF12
ZNF691	ORC1	ZMYM2	TAF15
ZNF740	ORC4	ZNF230	TAF2
ZNF768	ORC5	ZNF276	TAF4
ZNF771	OXNAD1	ZNF280D	TAF4B
ZNF777	PAK2	ZNF316	TAF5
ZNF787	PARP1	ZNF385A	TAF5L
ZSCAN25	PCF11	ZNF48	TAF6
ZSCAN26	PCYT1A	ZNF564	TAF6L
ZSCAN29	PDCD11	ZNF622	TAF7
ZSCAN5A	PDS5A	ZNF706	TAF8
ZXDC	PDXK	NFKB1	TAF9
ZZZ3	PGAM1	PPARG	TAF9B
AAAS	PGP	RFXANK	TASOR
ABHD14B	PHF6	TFAP2A	TBL1X
ABI2	PIMREG	YY1	TBL1XR1
ACIN1	PIN4	ACTR8	TBP
ACP1	PKP1	ADNP	TBX3
ACSL3	POGLUT2	AFF4	TCEA1
ACYP2	POGZ	ALYREF	TCERG1
ADAR	POLD2	ANP32A	TCF12
ADARB1	POLDIP3	ANP32E	TCF20
ADPRS	POLE3	ARID4A	TCF7L2
AFG2B	POLR2G	ASF1A	TDP2
AHDC1	POLR3B	ATF1	TEAD1
AKAP17A	POP5	ATF3	TEAD3
AKAP8	POP7	BAZ1B	TEAD4
AKAP8L	PPIL4	BHLHE40	TERF2
ALDOC	PPP1R8	BLM	TERF2IP
ALG8	PRPF3	CASP8AP2	TFAM
ALKBH2	PRPF31	CBX4	TFAP2A
ANAPC10	PRPF38A	CBX5	TFAP2C
ANAPC11	PRPF4	CBX8	TFAP4
ANAPC2	PRPF40A	CCNC	TFB1M
ANAPC5	PRPF8	CDK7	TFB2M
ANKRD17	PRR14L	CEBPG	TFCP2
ANKZF1	PRR3	CHD7	TFDP1
ANLN	PSMA1	CHTOP	TFDP2
ANXA11	PSMA6	CIZ1	TFE3
ANXA5	PSMB1	CNBP	TFEB
ANXA8L1	PSMB2	CTBP2	TGIF1
AP3B1	PSMB4	CTR9	THAP1
API5	PSMB7	CXXC1	THAP11
APOBEC3B	PSMD7	DDX1	THAP4
APOC3	PTBP1	DDX17	THOC5
APTX	PUM3	DEK	THRAP3
AQR	RAB9A	DHX36	THYN1
ARB2A	RAVER1	DLX3	TLE3
ARIH1	RBM17	DPF2	TOP1
ARL6IP4	RBM26	EHMT2	TOP1MT
ARL6IP6	RBM33	ELF1	TOX4
ARMC8	RBM34	EMSY	TP53BP1
ARPC2	RBM42	EP400	TPR
ARPC3	RBM45	ERCC2	TRERF1
ASXL2	RBM5	ETV6	TRIM25
ATAD1	RBMS2	EYA1	TRIM27
ATAD5	RBMX2	EYA3	TRIM28
ATM	RCL1	EZH2	TRIM29
ATP6V1C1	RFC2	FUS	TRIM33
ATRIP	RIOX1	GMEB2	TRIP13
AUP1	RIOX2	GON4L	TRIP6
BAG1	RNF40	GPS2	TRPS1
BANF1	RPL22	GSK3B	TRRAP
BAP1	RPL27	GTF2A1	TSG101
BARD1	RPL7A	HDGF	TTF1
BCCIP	RPP40	HMGXB3	TTF2
BCL7B	RPRD2	HOXC9	TWIST2
BCL7C	RPS19	INO80E	TXLNG
BCORL1	RPS6KA3	KAT5	TXN
BICRAL	RRP36	KDM1A	UBP1
BLTP3B	RRP7A	KDM3A	UBTF
BMAL1	RRP9	KDM4D	UFL1
BOD1L1	RRS1	KLF4	USF1
BOP1	RTCB	KMT2A	USF2
BRCC3	RTF2	KMT5A	UTP4
BRD9	S100A4	MAZ	VDR
BRK1	SART1	MECP2	VEZF1
BRPF3	SART3	MED15	WAC
BUB3	SCAF1	MED18	WBP2
BUD13	SCAF11	MED19	WDHD1
BUD23	SF3A1	MED25	WDR5
C11orf54	SF3B2	MED27	WDR77
C12orf43	SGO1	MIS18BP1	WIZ
C15orf61	SGPP1	MNAT1	XRCC6
C16orf87	SGTA	MNT	XRN2
C17orf49	SHCBP1	MYBL2	YAF2
C18orf21	SLC25A12	NFXL1	YBX1
C19orf47	SLF1	NFYC	YBX3
C19orf53	SLX9	NONO	YEATS2
C1orf174	SMC5	NPAS2	YEATS4
C1orf35	SMPD4	OGT	YWHAB
C2orf42	SNRNP35	PARP12	YY1
C2orf49	SNRNP48	PBX2	ZBED1
C5orf24	SPECC1	PDCD4	ZBED4
C7orf50	SPIN1	PHF1	ZBED6
C8orf33	SPTBN4	PHF12	ZBTB1
C9orf78	SRM	PHF5A	ZBTB11
CAPG	SRRT	PHIP	ZBTB2
CBLL1	SRSF10	PIAS4	ZBTB21
CBR1	STXBP3	POLR2A	ZBTB24
CBX1	SUGP2	PRDM15	ZBTB33
CC2D1B	SUMO3	PRPF6	ZBTB38
CCDC12	SYF2	RALY	ZBTB4
CCDC127	SYMPK	RBM14	ZBTB40
CCDC77	TEX10	RBM15B	ZBTB41
CD2BP2	TICRR	RBM39	ZBTB48
CD70	TKT	RBPJ	ZBTB7A
CDA	TLK1	RBX1	ZBTB7B
CDC27	TMA16	SAFB2	ZFP3
CDC40	TMEM209	SAP30	ZFP37
CDCA2	TOP2A	SFPQ	ZFP64
CDCA5	TOP2B	SIRT6	ZFP91
CDCA8	TOPBP1	SIX4	ZFX
CDIPT	TPI1	SKI	ZGPAT
CDK11B	TRIM41	SMARCC1	ZHX1
CDK2AP1	TRIR	SP140L	ZHX2
CDKN2AIP	TRMT1L	SRFBP1	ZHX3
CELF1	TSPYL1	SRSF2	ZIC2
CENATAC	TXNL4A	SS18	ZKSCAN1
CENPH	TXNRD1	SUPT7L	ZKSCAN4
CENPI	UBE2V2	TAF10	ZKSCAN8
CENPN	UBN1	TAF5	ZMYM2
CENPP	UBN2	TAF5L	ZMYND11
CENPT	URB2	TAF6	ZMYND8
CENPV	USP22	TAF6L	ZNF121
CFAP20	USP42	TAF8	ZNF131
CGAS	USP7	TFAP2C	ZNF142
CHAF1A	UTP3	TPR	ZNF143
CHAMP1	VPS72	TRIM27	ZNF146
CHD2	WDR13	TRIP13	ZNF148
CIRBP	WDR46	TTF1	ZNF174
CLIC3	ZBTB9	UBTF	ZNF184
CLK1	ZC3H11A	VEZF1	ZNF189
CLK3	ZC3H4	XRN2	ZNF207
CLP1	ZC3H8	YAF2	ZNF217
CMPK1	ZCCHC9	ZBED6	ZNF219
CMSS1	ZFAND6	ZBTB11	ZNF22
COIL	ZMYM4	ZBTB24	ZNF230
COPS3	ZNF330	ZBTB40	ZNF24
COPS4	ZNF346	ZBTB7A	ZNF276
COPS6	MEF2D	ZFX	ZNF280C
COPS7A	PBX1	ZGPAT	ZNF280D
COPS8	SP2	ZHX3	ZNF281
CPA4	USF2	ZKSCAN1	ZNF292
CPNE1	VDR	ZMYND8	ZNF3
CPS1	AATF	ZNF146	ZNF316
CPSF1	ABL1	ZNF219	ZNF317
CPSF2	ACTL6A	ZNF292	ZNF318
CPSF4	ADNP	ZNF318	ZNF320
CPSF6	APEX1	ZNF45	ZNF326
CPSF7	ARGLU1	ZNF462	ZNF341
CRIP2	ARID1A	ZNF579	ZNF35
CRIPT	ASH2L	ZNF623	ZNF350
CRKL	ATAD2	ZNF638	ZNF362
CSE1L	ATF2	ZNF687	ZNF384
CSNK1D	BEND3	ZSCAN5A	ZNF385A
CSTF1	BLM	NR3C1	ZNF414
CSTF2	BRD1	RFX2	ZNF444
CSTF2T	BRD4	ACTN4	ZNF45
CSTF3	BRD8	ACTR5	ZNF451
CTDSPL2	BTAF1	ADNP2	ZNF460
CTNNBL1	CCDC59	AGO2	ZNF462
CUL1	CDK5	AIP	ZNF48
CUL4A	CDK9	ANXA4	ZNF512
CUL4B	CDX2	ASH1L	ZNF512B
CWC22	CHAF1B	BASP1	ZNF516
CWC25	CHD4	CALR	ZNF532
CWF19L2	CHD6	CBFB	ZNF564
CYRIB	CHD8	CC2D1A	ZNF579
CYSRT1	CHTOP	CCNA2	ZNF581
DAZAP1	CIZ1	CDK1	ZNF592
DCAF13	CNOT2	CEP290	ZNF593
DCAF7	COPS5	CNOT1	ZNF609
DCAKD	DCAF1	CTNND1	ZNF622
DCLRE1A	DDX17	DDX54	ZNF623
DCTN5	DDX5	ENY2	ZNF627
DCUN1D1	DHX33	EZR	ZNF629
DCUN1D5	DHX36	FHL2	ZNF638
DDA1	DLX1	FHOD1	ZNF639
DDB1	DNAJB1	KLF13	ZNF646
DDX10	DPF2	KMT2D	ZNF652
DDX19A	DPY30	MAFG	ZNF664
DDX23	DR1	MED20	ZNF668
DDX27	EP400	NIBAN2	ZNF687
DDX31	EPC1	PARK7	ZNF689
DDX39A	FIZ1	PREB	ZNF691
DDX41	GATAD2A	RAF1	ZNF706
DDX42	GTF2B	REL	ZNF740
DDX46	H1-5	RHOA	ZNF768
DDX47	HEATR1	TAF12	ZNF771
DDX50	HIRA	TRIM25	ZNF777
DDX51	HMGA2	TSG101	ZNF787
DDX52	HMGB3	WDR77	ZSCAN25
DDX55	HNRNPC	YBX3	ZSCAN26
DDX56	HNRNPK	YWHAB	ZSCAN29
DENND2B	HOXA11	ZNF121	ZSCAN5A
DERA	INO80B	ZNF189	ZXDC
DHX15	KAT8	ZNF646	ZZZ3
DHX16	KDM2A	NR1H2	AGO1
DHX34	KDM4B	YY2	ASCC3
DHX35	KDM4D	ASCC1	ATF4
DHX37	KDM5A	CHEK1	ATF5
DHX38	MAFF	CNOT11	ATF6B
DHX40	MED14	CNOT7	ATF7IP
DHX8	MED19	KDM3B	BACH2
DIDO1	MED8	KMT5C	BRIP1
DIMT1	MEIS1	MEAF6	CASK
DIS3	MEN1	MED22	CDK12
DKC1	MGA	MNDA	CDK13
DLG3	MLLT6	MYCBP	CHD1
DLST	MLX	PCGF2	CHD9
DNAJB4	MORF4L1	PIN1	CIC
DNAJB6	MYBL2	PYCARD	CREM
DNAJC17	NCOR1	SMAD5	CRTC2
DNAJC25	NFRKB	SMYD3	DAXX
DNAJC7	NFXL1	SUPT4H1	DEAF1
DNAJC8	NFYC	TCEA2	DOT1L
DNAJC9	NKRF	TDG	E4F1
DPH1	NONO	TGIF2	EGFR
DRG1	NR4A1	THAP10	ELF4
DROSHA	NRF1	ZNF511	ELK4
DSCC1	NSD2	ARL2BP	ELP1
DSN1	PARP12	AURKAIP1	EYA4
DUSP11	PAXBP1	CRK	EZH1
DUSP12	PAXIP1	DPF1	FOSB
DUSP23	PCBD1	EGLN1	FOSL1
DUT	PCGF5	HINT1	FOXL2
DYNLT1	PHF12	ING5	FOXO3
EBNA1BP2	PHF20	LANCL2	GLIS2
ECPAS	PIAS2	MTPN	GMEB1
EEF1D	PIAS4	NMI	HELZ2
EFTUD2	PITX1	PEX14	HOXB13
EIF3L	PKNOX1	PIH1D1	IKBKG
EIF4A3	POLR3C	PLSCR1	INO80
EIF6	RBBP5	SNX6	INO80D
ELAC2	RBMX	SUV39H1	IRF2BPL
ELAVL1	RBPJ	TGFB1	KDM5C
ELOA	RCOR2	TRADD	LRRFIP1
EMD	RCOR3	ZNF536	MAGED1
EME1	SAP130	MED21	MED13L
EMG1	SAP18	NR1H3	MED9
ENDOD1	SGF29	PMF1	MMS19
ENSA	SIRT6	SETD7	MYNN
EPOP	SKIL	TBPL1	MYO6
ERCC1	SMARCA4	TERF1	MZF1
ERCC4	SMARCA5	TRIP4	NCOR2
ERCC6	SMARCC1	ZBTB14	NFE2L1
ERGIC1	SNIP1	IRF3	NFE2L2
ERH	SRSF2	CTH	OTX1
ESPL1	TAF4	NCK1	PBXIP1
ESS2	TAF4B	PFDN5	POU2F3
ETAA1	TAF6L	SIRT5	PRDM4
EXOC4	TAF7	TRIM11	RPTOR
EXOSC1	TAF8	WDTC1	SALL4
EXOSC10	TBX3		SATB2
EXOSC2	TDP2		SDR16C5
EXOSC3	TFDP1		SETD2
EXOSC5	TFDP2		SFMBT2
EXOSC7	TGIF1		SIX5
EXOSC9	THOC5		SMARCAD1
FAAP24	THYN1		SMARCAL1
FAM107B	TP53BP1		SNAPC4
FAM32A	TRIP13		SOX13
FAM50A	UBP1		SREBF1
FAM50B	UTP4		SRF
FAM76B	WDHD1		TAF13
FAM83A	XRCC6		TAF1C
FAM98B	ZBTB1		TAF3
FANCD2	ZBTB7A		TCF3
FANCF	ZFP64		TFAP2B
FANCI	ZNF131		THAP12
FANCL	ZNF174		TIMELESS
FANCM	ZNF184		TMF1
FARSB	ZNF22		TNKS
FBL	ZNF320		TRIM16
FBXL18	ZNF45		TSHZ1
FBXL6	ZNF451		YAP1
FBXO11	ZNF462		YY1AP1
FBXO28	ZNF512		ZBTB17
FBXO31	ZNF512B		ZBTB20
FBXO46	ZNF516		ZBTB43
FCF1	ZNF532		ZBTB44
FEN1	ZNF579		ZBTB45
FIBP	ZNF581		ZEB1
FIP1L1	ZNF592		ZEB2
FKBP5	ZNF593		ZFAT
FLYWCH1	ZNF623		ZFHX3
FLYWCH2	ZNF629		ZFTA
FMN1	ZNF639		ZKSCAN2
FTSJ3	ZNF652		ZNF16
FUBP1	ZNF664		ZNF205
FUBP3	ZNF668		ZNF274
FYTTD1	ZNF687		ZNF335
GAPDHS	ZNF689		ZNF354A
GAR1	ZNF691		ZNF471
GATD1	ZNF740		ZNF483
GCLC	ZNF771		ZNF574
GDA	ZNF777		ZNF587
GDPD3	ZNF787		ZNF618
GEMIN2	ZSCAN26		ZNF628
GET3	ZSCAN29		ZNF653
GFPT1	ZSCAN5A		ZNF692
GLE1	ZZZ3		ZNF710
GLYR1	AAAS		ZNF711
GNL2	ABHD14B		ZNF746
GNL3L	ABI2		ZNF800
GPALPP1	ACIN1		ZNF865
GPATCH11	ACP1		ZSCAN20
GPKOW	ACSL3		ZSCAN22
GPS1	ACYP2
GRWD1	ADAR
GSK3A	ADARB1
GSS	ADPRS
GTF2E2	AFG2B
GTF2F2	AHDC1
GTF3C1	AKAP8
GTF3C2	AKAP8L
GTF3C3	ALDOC
GTF3C4	ALG8
GTF3C5	ALKBH2
GTPBP4	ANAPC10
H1-0	ANAPC11
H1-1	ANAPC2
H1-10	ANKRD17
H2BC26	ANKZF1
H2BC5	ANLN
H3-3A	ANXA11
HASPIN	ANXA5
HDGFL2	ANXA8L1
HDGFL3	API5
HEATR3	APOBEC3B
HECTD1	APOC3
HMCES	AQR
HMGN1	ARIH1
HMGN2	ARL6IP4
HMGN3	ARL6IP6
HMGN4	ARMC8
HMGN5	ARPC2
HNRNPA0	ARPC3
HNRNPA1	ASXL2
HNRNPA1L2	ATAD5
HNRNPA2B1	ATM
HNRNPA3	ATP6V1C1
HNRNPAB	AUP1
HNRNPDL	BAG1
HNRNPF	BANF1
HNRNPH1	BARD1
HNRNPH2	BCL7B
HNRNPH3	BCL7C
HNRNPL	BICRAL
HNRNPLL	BMAL1
HNRNPM	BRPF3
HNRNPR	BUD13
HNRNPUL1	C11orf54
HNRNPUL2	C12orf43
HP1BP3	C15orf61
HPSE	C16orf87
IFI16	C17orf49
IFRD2	C19orf47
IGHMBP2	C19orf53
IK	C1orf174
IL37	C1orf35
IMP3	C2orf42
IMP4	C2orf49
IMPA2	C5orf24
ING2	C7orf50
INTS1	C8orf33
INTS13	C9orf78
INTS3	CBLL1
INTS4	CBR1
INTS5	CBX1
INTS6	CCDC12
INTS7	CCDC127
INTS8	CCDC77
INTS9	CDC40
IPO5	CDCA8
IPO8	CDK2AP1
IRF2BP2	CDKN2A
ISG20L2	CDKN2AIP
ISY1	CELF1
IWS1	CENATAC
KANK2	CENPH
KANSL1	CENPT
KANSL3	CENPV
KAT7	CFAP20
KCTD14	CHAF1A
KCTD15	CHAMP1
KHDC4	CHD2
KHDRBS1	CLIC3
KIF22	CLK1
KIF23	CLK3
KLHL18	CLP1
KNOP1	CMPK1
KPNA1	CMSS1
KPNA2	COPS3
KPNA4	COPS4
KPNB1	COPS6
KRI1	COPS7A
KRR1	COPS8
KRT77	CPNE1
LAMTOR2	CPS1
LAS1L	CPSF1
LBR	CPSF2
LEMD2	CRIP2
LEMD3	CRIPT
LENG8	CRKL
LGALSL	CSE1L
LIG3	CSNK1D
LLPH	CSTF1
LMNA	CSTF2T
LMNB1	CTDSPL2
LMNB2	CTNNBL1
LRRC40	CUL4B
LRRC41	CWC25
LRRC47	CWF19L2
LRWD1	DAZAP1
LSM10	DCAF13
LSM2	DCAF7
LSM3	DCTN5
LSM7	DCUN1D1
LUC7L	DCUN1D5
LUC7L2	DDX23
LUC7L3	DDX27
LYRM4	DDX39A
MACROD1	DDX42
MACROH2A1	DDX47
MAD1L1	DDX50
MAD2L1	DDX55
MAD2L1BP	DHX15
MAK16	DHX16
MAP2K6	DHX34
MAPK3	DHX37
MAT2A	DHX38
MATR3	DHX40
MAU2	DKC1
MBNL1	DLST
MBNL2	DNAJB4
MCEE	DNAJB6
MCM10	DNAJC17
MCM2	DNAJC25
MCM3	DNAJC7
MCM4	DPH1
MCM5	DRG1
MCM6	DROSHA
MCM7	DSCC1
MDC1	DSN1
ME1	DUSP11
MEPCE	DUSP12
METTL16	DUT
MFAP1	EBNA1BP2
MGMT	EEF1D
MGST3	EFTUD2
MKI67	EIF3L
MLF2	EIF4A3
MLH1	ELAC2
MON2	ELAVL1
MORC2	ELOA
MORC3	EMD
MPG	EMG1
MPHOSPH10	ENDOD1
MRE11	ENSA
MRTO4	ERCC1
MSH2	ERCC4
MSH3	ERCC6
MSH6	ERH
MSL1	ESPL1
MTBP	ESS2
MTREX	ETAA1
MUS81	EXOC4
MYADM	EXOSC1
MYG1	EXOSC10
MYH14	EXOSC7
MYO1C	EXOSC9
MYO1E	FAAP24
MYPN	FAM107B
NAA40	FAM32A
NAA50	FAM50B
NABP1	FAM98B
NABP2	FBL
NACC1	FBXL6
NAE1	FCF1
NAIF1	FIBP
NAMPT	FIP1L1
NANS	FKBP5
NAP1L4	FLYWCH2
NAT10	FYTTD1
NAV2	GAPDHS
NAXE	GAR1
NBN	GATD1
NCAPD3	GCLC
NCAPG2	GDA
NCAPH2	GDPD3
NCBP2	GEMIN2
NCBP3	GET3
NDC1	GLYR1
NEK7	GNL3L
NEPRO	GPALPP1
NFKBIL1	GPKOW
NHEJ1	GPS1
NIFK	GRWD1
NIP7	GTF2E2
NLE1	GTF2F2
NMD3	GTF3C1
NMNAT1	GTF3C3
NOC3L	GTF3C4
NOC4L	GTF3C5
NOL10	H1-0
NOL4L	H1-10
NOL6	H2BC26
NOL8	H2BC5
NOL9	H3-3A
NOLC1	HDGFL2
NOM1	HDGFL3
NOP10	HEATR3
NOP14	HECTD1
NOP16	HMCES
NOP2	HMGN1
NOP53	HMGN2
NOP56	HMGN4
NOP58	HMGN5
NOP9	HNRNPA0
NOSIP	HNRNPA1
NPEPL1	HNRNPA1L2
NRDC	HNRNPA2B1
NRM	HNRNPA3
NSA2	HNRNPAB
NSFL1C	HNRNPDL
NSL1	HNRNPH1
NSMCE1	HNRNPH2
NSMCE2	HNRNPH3
NSMCE4A	HNRNPL
NSUN2	HNRNPLL
NSUN5	HNRNPM
NUDT21	HNRNPR
NUF2	HNRNPUL1
NUFIP2	HP1BP3
NUMA1	IFI16
NUP107	IFRD2
NUP133	IGHMBP2
NUP153	IK
NUP155	IL37
NUP188	IMP3
NUP35	IMP4
NUP37	IMPA2
NUP42	ING2
NUP43	INTS1
NUP50	INTS3
NUP54	INTS4
NUP85	INTS5
NUP88	INTS6
NUSAP1	INTS9
NVL	IPO8
NXF1	IRF2BP2
OARD1	ISY1
OGFOD3	KANK2
OGG1	KANSL3
ORC1	KCTD15
ORC3	KHDRBS1
ORC4	KIF22
ORC5	KIF23
ORC6	KLHL18
OXNAD1	KNOP1
PAAF1	KPNA2
PABPN1	KPNA4
PAK1IP1	KPNB1
PAK2	KRI1
PAPOLA	KRT77
PAPOLG	LAMTOR2
PARN	LAS1L
PARP1	LBR
PARP2	LEMD2
PAXX	LEMD3
PCBP1	LENG8
PCF11	LGALSL
PCID2	LIG3
PCNA	LLPH
PCNP	LMNA
PCYT1A	LMNB1
PDCD11	LMNB2
PDS5A	LRRC40
PDS5B	LRRC41
PDXK	LRRC47
PELO	LRWD1
PEPD	LSM3
PGAM1	LSM7
PGLS	LUC7L
PGP	LUC7L2
PHAX	LUC7L3
PHC2	LYRM4
PHC3	MACROH2A1
PHF20L1	MAD1L1
PHF3	MAD2L1
PHF6	MAD2L1BP
PHLDA2	MAPK3
PIK3C2A	MAT2A
PIMREG	MBNL1
PIN4	MBNL2
PKP1	MCEE
PLCB3	MCM10
PMM2	MCM2
PMS2	MCM3
PNKP	MCM4
PNN	MCM5
PNO1	MCM6
POGLUT2	MCM7
POGZ	ME1
POLA2	MEPCE
POLD1	METTL16
POLD2	MFAP1
POLDIP3	MGMT
POLE3	MGST3
POLL	MLF2
POLR1A	MON2
POLR1B	MORC3
POLR1C	MPG
POLR1E	MPHOSPH10
POLR1F	MRTO4
POLR1G	MSH2
POLR1H	MSH3
POLR2B	MSH6
POLR2C	MSL1
POLR2E	MTBP
POLR2G	MTREX
POLR2H	MUS81
POLR2L	MYADM
POLR3A	MYG1
POLR3B	MYH14
POLR3D	MYO1C
POLR3E	MYO1E
POM121	MYPN
POP1	NAA40
POP4	NAA50
POP5	NABP1
POP7	NABP2
PPIG	NACC1
PPIL1	NAE1
PPIL2	NAIF1
PPIL3	NAMPT
PPIL4	NANS
PPM1D	NAP1L4
PPM1G	NAT10
PPME1	NAV2
PPP1CB	NAXE
PPP1R10	NBN
PPP1R7	NCBP2
PPP1R8	NCBP3
PPP4C	NDC1
PPWD1	NEK7
PRCC	NEPRO
PRIM2	NFKBIL1
PRKAA1	NIP7
PRKDC	NMD3
PRP4K	NMNAT1
PRPF19	NOC4L
PRPF3	NOL6
PRPF31	NOL9
PRPF38A	NOLC1
PRPF4	NOM1
PRPF40A	NOP10
PRPF8	NOP14
PRR14	NOP16
PRR14L	NOP2
PRR3	NOP53
PSMA1	NOP56
PSMA6	NOP9
PSMB1	NOSIP
PSMB2	NPEPL1
PSMB4	NRDC
PSMB7	NRM
PSMC3IP	NSA2
PSMD1	NSFL1C
PSMD13	NSL1
PSMD14	NSMCE1
PSMD3	NSMCE2
PSMD4	NSMCE4A
PSMD7	NSUN2
PSME3	NSUN5
PSMG2	NUDT21
PTBP1	NUF2
PTBP2	NUFIP2
PTBP3	NUMA1
PTPA	NUP107
PUM3	NUP133
PUS7	NUP153
PWP1	NUP155
PWP2	NUP35
PWWP2A	NUP42
QKI	NUP43
QSER1	NUP50
RAB5A	NUP54
RAB8A	NUSAP1
RAB9A	NVL
RACGAP1	NXF1
RACK1	OGFOD3
RAD18	OGG1
RAD23A	ORC3
RAD23B	ORC6
RAD50	PAAF1
RAD51AP1	PABPN1
RAD52	PAK1IP1
RAE1	PAPOLA
RAI14	PAPOLG
RALGAPB	PARN
RANBP2	PARP2
RANGAP1	PAXX
RAVER1	PCBP1
RBBP6	PCID2
RBIS	PCNA
RBM10	PCNP
RBM12	PDS5B
RBM12B	PELO
RBM17	PEPD
RBM19	PGLS
RBM22	PHAX
RBM25	PHC2
RBM26	PHC3
RBM27	PHF20L1
RBM28	PHF3
RBM3	PHLDA2
RBM33	PIK3C2A
RBM34	PLCB3
RBM4	PMM2
RBM42	PMS2
RBM45	PNKP
RBM4B	PNN
RBM5	PNO1
RBM6	POLA2
RBM7	POLD1
RBM8A	POLL
RBMS2	POLR1A
RBMX2	POLR1B
RBMXL1	POLR1C
RCC1	POLR1E
RCL1	POLR1F
RDH14	POLR1G
RECQL	POLR1H
RFC1	POLR2B
RFC2	POLR2C
RFC3	POLR2E
RFC4	POLR2H
RFC5	POLR2L
RIF1	POLR3A
RIOX1	POLR3D
RIOX2	POLR3E
RMI1	POM121
RMI2	POP1
RNASEH2B	POP4
RNF169	PPIG
RNF40	PPIL1
RNGTT	PPIL2
RNMT	PPIL3
RNPS1	PPM1D
RPA1	PPM1G
RPA2	PPME1
RPF1	PPP1CB
RPF2	PPP1R10
RPL18A	PPP1R7
RPL22	PPP4C
RPL22L1	PPWD1
RPL27	PRCC
RPL7A	PRIM2
RPP25	PRKAA1
RPP30	PRKDC
RPP38	PRP4K
RPP40	PRPF19
RPRD2	PRR14
RPS19	PSMC3IP
RPS6KA3	PSMD1
RPUSD3	PSMD13
RRP12	PSMD14
RRP36	PSMD3
RRP7A	PSMD4
RRP9	PSME3
RRS1	PSMG2
RSBN1	PTBP2
RSBN1L	PTBP3
RSL24D1	PTPA
RSRC1	PUS7
RTCA	PWP1
RTCB	PWP2
RTF2	PWWP2A
RTRAF	QKI
S100A4	QSER1
S100P	RAB5A
SARNP	RAB8A
SART1	RACGAP1
SART3	RACK1
SCAF1	RAD18
SCAF11	RAD23A
SCAF4	RAD23B
SCAF8	RAD50
SCFD2	RAD51AP1
SDAD1	RAD52
SDCBP2	RAE1
SDE2	RAI14
SEC11A	RALGAPB
SEC13	RANBP2
SEC24B	RANGAP1
SELENBP1	RBBP6
SELENOH	RBIS
SENP3	RBM10
SEPHS1	RBM12
SERF2	RBM12B
SERPINB8	RBM19
SET	RBM22
SETD5	RBM25
SETMAR	RBM27
SF3A1	RBM28
SF3A2	RBM3
SF3A3	RBM4
SF3B1	RBM4B
SF3B2	RBM6
SF3B3	RBM7
SF3B4	RBM8A
SF3B5	RBMXL1
SF3B6	RCC1
SGO1	RDH14
SGPP1	RECQL
SGTA	RFC1
SHCBP1	RFC3
SINHCAF	RFC4
SKIC2	RFC5
SKP1	RIF1
SLC25A12	RMI1
SLC3A2	RMI2
SLC4A1AP	RNASEH2B
SLF1	RNF169
SLFN5	RNGTT
SLU7	RNMT
SLX9	RNPS1
SMARCA1	RPA1
SMC1A	RPA2
SMC2	RPF1
SMC3	RPF2
SMC5	RPL18A
SMC6	RPL22L1
SMCHD1	RPP25
SMG8	RPP30
SMNDC1	RPP38
SMPD4	RPUSD3
SMTN	RRP12
SMUG1	RSBN1
SNRNP200	RSBN1L
SNRNP27	RSL24D1
SNRNP35	RSRC1
SNRNP40	RTCA
SNRNP48	RTRAF
SNRNP70	S100P
SNRPA	SARNP
SNRPA1	SCAF4
SNRPB	SCAF8
SNRPB2	SCFD2
SNRPC	SDAD1
SNRPD3	SDCBP2
SPAST	SDE2
SPECC1	SEC11A
SPIN1	SEC13
SPTBN4	SEC24B
SPTY2D1	SELENBP1
SREK1	SELENOH
SRM	SENP3
SRP14	SEPHS1
SRRM2	SERF2
SRRT	SERPINB8
SRSF1	SET
SRSF10	SETD5
SRSF11	SETMAR
SRSF3	SF3A2
SRSF4	SF3A3
SRSF5	SF3B1
SRSF6	SF3B3
SRSF7	SF3B4
SRSF9	SF3B5
SSB	SF3B6
SSBP4	SINHCAF
STAG1	SKIC2
STAG2	SKP1
STAMBP	SLC3A2
STAU2	SLC4A1AP
STEAP4	SLFN5
STEEP1	SLU7
STK10	SMARCA1
STK26	SMC1A
STK35	SMC2
STXBP3	SMC3
SUGP1	SMC6
SUGP2	SMCHD1
SUMO2	SMG8
SUMO3	SMNDC1
SUN1	SMTN
SUN2	SMUG1
SURF2	SNRNP200
SURF6	SNRNP27
SYF2	SNRNP40
SYMPK	SNRNP70
SYNCRIP	SNRPA
SYNE3	SNRPA1
TARDBP	SNRPB
TASOR2	SNRPB2
TATDN1	SNRPC
TBL3	SNRPD3
TBRG1	SPAST
TCEANC2	SPTY2D1
TCOF1	SREK1
TDP1	SRP14
TEX10	SRRM2
TFIP11	SRSF1
THOC1	SRSF11
THOC2	SRSF3
THOC3	SRSF4
THOC6	SRSF5
THY1	SRSF6
TIA1	SRSF7
TIAL1	SRSF9
TICRR	SSB
TIGD2	SSBP4
TKT	STAG1
TLK1	STAG2
TMA16	STAMBP
TMA7	STAU2
TMEM201	STEAP4
TMEM209	STEEP1
TMEM35B	STK10
TMUB1	STK26
TNPO1	STK35
TOE1	SUGP1
TOP2A	SUMO2
TOP2B	SUN1
TOPBP1	SUN2
TOR1AIP1	SURF2
TPI1	SURF6
TPX2	SYNCRIP
TRA2A	SYNE3
TRA2B	TARDBP
TRAF4	TASOR2
TRIM41	TATDN1
TRIP12	TBL3
TRIR	TBRG1
TRMT1L	TCEANC2
TSNAX	TCOF1
TSPYL1	TDP1
TSR1	TFIP11
TXNL4A	THOC1
TXNRD1	THOC2
U2AF1	THOC3
U2AF2	THOC6
U2SURP	THY1
UACA	TIA1
UBA1	TIAL1
UBA2	TIGD2
UBE2E1	TMA7
UBE2I	TMEM201
UBE2M	TMEM35B
UBE2N	TMUB1
UBE2T	TNPO1
UBE2V1	TOE1
UBE2V2	TOR1AIP1
UBFD1	TPX2
UBN1	TRA2A
UBN2	TRA2B
UBQLN1	TRAF4
UBR5	TRIP12
UBXN7	TSNAX
UGDH	TSR1
UHRF1	U2AF1
UHRF2	U2AF2
UIMC1	U2SURP
UNC45A	UACA
UNG	UBA1
UPF1	UBA2
UPF3A	UBE2E1
UPP1	UBE2I
URB1	UBE2M
URB2	UBE2N
USP1	UBE2T
USP22	UBE2V1
USP3	UBFD1
USP36	UBQLN1
USP39	UBR5
USP42	UBXN7
USP48	UGDH
USP7	UHRF1
UTP11	UHRF2
UTP14A	UIMC1
UTP18	UNC45A
UTP20	UNG
UTP23	UPF1
UTP3	UPF3A
UTP6	UPP1
VIRMA	URB1
VPS72	USP1
VRK1	USP3
VRK3	USP36
VWA5A	USP39
WAPL	USP48
WBP11	UTP11
WDR13	UTP14A
WDR18	UTP18
WDR25	UTP20
WDR3	UTP23
WDR33	UTP6
WDR36	VIRMA
WDR46	VRK1
WDR55	VRK3
WDR74	VWA5A
WDR76	WAPL
WDR82	WBP11
WRAP53	WDR18
WRN	WDR25
WRNIP1	WDR3
WTAP	WDR33
XAB2	WDR36
XPC	WDR55
XPO1	WDR74
XPO5	WDR76
XPOT	WDR82
XRCC1	WRAP53
XRCC5	WRN
YBEY	WRNIP1
YLPM1	WTAP
YTHDC1	XAB2
ZBTB9	XPC
ZC3H11A	XPO1
ZC3H13	XPO5
ZC3H14	XPOT
ZC3H18	XRCC1
ZC3H3	XRCC5
ZC3H4	YBEY
ZC3H8	YLPM1
ZC3HC1	YTHDC1
ZCCHC8	ZC3H13
ZCCHC9	ZC3H14
ZFAND6	ZC3H18
ZFC3H1	ZC3H3
ZFR	ZC3HC1
ZMYM3	ZCCHC8
ZMYM4	ZFC3H1
ZNF106	ZFR
ZNF330	ZMYM3
ZNF346	ZNF106
ZNHIT1	ZNHIT1
ZRANB2	ZRANB2
ZZEF1	ZZEF1
NR1H2	ELK4
YY2	FOSL1
ASCC1	MZF1
CHEK1	SOX13
CNOT11	TCF3
CNOT7	ATF4
KDM3B	ATF5
KMT5C	ATF7IP
MEAF6	BACH2
MED21	CASK
MED22	CDK13
MNDA	CHD1
MYCBP	CHD9
NR1H3	CRTC2
PCGF2	DAXX
PIN1	DEAF1
PMF1	EYA4
PYCARD	EZH1
SETD7	FOSB
SMAD5	FOXL2
SMYD3	GLIS2
SUPT4H1	GMEB1
TBPL1	INO80
TCEA2	IRF2BPL
TDG	KDM5C
TERF1	MED9
TGIF2	MMS19
THAP10	NCOR2
TRIP4	OTX1
ZBTB14	PBXIP1
ZNF511	POU2F3
ABRAXAS1	PRDM4
ACD	SATB2
ADI1	SETD2
AK6	SFMBT2
AMMECR1	TAF13
AMMECR1L	YAP1
AMZ2	YY1AP1
ANAPC15	ZBTB20
ARHGEF38	ZBTB43
ARL2	ZBTB44
ARL4A	ZEB2
ATOX1	ZFHX3
ATP6V1G1	ZNF16
BABAM1	ZNF205
BCL2L2	ZNF274
BPNT1	ZNF335
C1S	ZNF354A
C8orf82	ATR
CACUL1	BMAL2
CCNQ	BUB1
CDKN1A	CRAMP1
CENPQ	DGCR8
CENPW	DNAAF5
CFDP1	FAF1
CIAO1	FAM120C
COPS7B	FBRS
CRYBG2	H3C14
CWC15	JADE2
DCPS	LIG1
DDX19B	MAN2B1
DEF6	MBD6
DHRS1	MPND
DISP3	PALB2
DNAAF10	PAPOLB
DPCD	QRICH1
DPH2	RAB3GAP1
DTWD1	RANBP9
DUSP3	RFWD3
ECSIT	RGPD5
EIPR1	SAMHD1
FBXO5	SGO2
FN3KRP	SHPK
FZR1	SKIC3
GEMIN6	SLF2
GFOD2	TUT1
GINS1	WASHC4
GMPPA	ZSWIM9
GNAQ	FOXO3
GPN3	NFE2L2
GRB2	SRF
HDHD3	ATF6B
HIKESHI	BRIP1
HUS1	CDK12
INTS15	CIC
ITGB1BP1	CREM
KCTD10	DOT1L
KIN	E4F1
LIAS	ELF4
LIN37	HOXB13
LMO4	MYNN
LRR1	MYO6
LSM11	NFE2L1
LSM8	SALL4
LYSMD1	SMARCAD1
LZIC	SMARCAL1
MAEA	SNAPC4
MAGOH	TAF1C
MAP2K4	TAF3
MAPK14	TFAP2B
METTL1	TIMELESS
METTL17	TNKS
METTL5	TSHZ1
MICU2	ZEB1
MIF4GD	ZFAT
MOB2	ZKSCAN2
MOSPD1	ZNF471
MPHOSPH6	ZNF483
MPLKIP	ZNF574
MSANTD2	ZNF587
MTMR3	ZNF618
NADK	ZNF628
NKIRAS2	ZNF653
NME3	ZNF692
NME7	ZNF711
NT5DC1	ZNF800
NTMT1	ZNF865
NUDCD1	ZSCAN20
NUDT16	AGL
OIP5	AGTPBP1
OSGEP	AMPD3
OVCA2	ANKS1B
PBDC1	ARHGAP10
PEF1	ATXN1
PEX3	ATXN1L
PM20D2	BICRA
POLD3	BRAT1
POLE2	BTBD16
POLR2D	C14orf93
POLR2I	CACTIN
POLR3G	CDC7
POLR3H	CHTF18
PPP4R2	CMTR1
PRPF18	CUL2
PSME2	DGKZ
PTER	DNPH1
PTMA	DTL
PTPN2	DUS3L
PTPN6	ECT2
RAD1	ENOPH1
RAD51	ERCC5
RANBP3	FAAP100
RGS10	FAM111B
RNASEH2A	FANCA
RNASEH2C	FCHSD1
RPP25L	FNBP4
RRAGC	H3C1
SCNM1	HJURP
SH3BGRL3	IGSF3
SMIM13	IPO11
SMS	JRKL
SPAG7	KIAA1328
SPC24	MFSD10
SPRYD4	MMS22L
STK19	MYPOP
STN1	NDC80
TAPBP	NLRP10
TATDN3	NPC1
TAX1BP3	NUFIP1
TFPT	OGFR
TINF2	PARP4
TMEM41A	PHC1
TMEM50B	PHLDB3
TMEM69	PPP4R1
TMX4	PPP4R3A
TOR1A	PROSER1
TSEN15	PTK6
TSEN2	PTPN23
TSEN34	RECQL4
TTC9C	RGPD8
TXNL4B	RNF144B
UBE2A	RNPC3
UBE2Q1	RPS6KA4
UBLCP1	SEC11C
UCHL3	SEC24A
UCK2	SERPINB9
UFC1	SETX
USP12	SIPA1
USP46	SLC1A3
XRCC4	SLC4A2
YJU2	SRRM1
ZMAT5	TOP3B
ZNF830	TPPP3
ZWINT	TPRG1
	TRPM4
	TTC21A
	TTC3
	UBE4A
	UBQLN4
	UBR4
	USP24
	USP28
	WASHC5
	XPO6
	ZDHHC5

## Sheet: S3
Gene-NPs	LOG2-FC	p-value		Gene-TFs/Co-factors	LOG2-FC	p-value
GABPB1	7.92158	9.38435e-08		GABPB1	7.92158	9.38435e-08
DNAJC25	7.65203	0.319248		MXD4	5.76009	0.000137199
RGPD5	6.7885	6.96275e-06		CCNA2	5.62194	0.144371
NSMCE1	5.55283	0.0832977		RFXANK	5.40134	0.0246445
RFXANK	5.40134	0.0246445		BACH2	5.2809	8.90972e-05
BACH2	5.2809	8.90972e-05		VDR	5.03983	0.000117861
VDR	5.03983	0.000117861		ESRRA	4.79665	1.47698e-07
SYF2	4.97916	0.00273569		TFDP2	4.76526	0.124035
NSMCE4A	4.78484	0.0106765		ING3	4.56119	0.00295447
TFDP2	4.76526	0.124035		MEF2A	4.51568	0.0101117
KCTD15	4.69234	0.000186582		HOXB13	4.50608	9.42637e-05
RNASEH2B	4.68517	0.197877		TAF13	4.20086	0.0119107
ING3	4.56119	0.00295447		NFIB	4.11615	2.09233e-06
GPALPP1	4.53632	2.5274e-06		NFYB	4.09525	1.23121e-05
MEF2A	4.51568	0.0101117		NFIC	4.02121	4.4604e-06
HOXB13	4.50608	9.42637e-05		NFYC	4.00126	1.5164e-05
FAM107B	4.44638	0.00926285		NR2C2	3.90445	0.000105245
OXNAD1	4.33328	0.142546		USF1	3.89894	3.37895e-06
PROSER1	4.23293	0.0134071		NFIA	3.87584	1.3185e-06
TAF13	4.20086	0.0119107		CREB1	3.83631	0.000349121
NFIB	4.11615	2.09233e-06		USF2	3.76959	6.76882e-06
NFYB	4.09525	1.23121e-05		NR4A3	3.69217	4.53943e-05
NFIC	4.02121	4.4604e-06		ETV6	3.58751	3.42439e-06
NFYC	4.00126	1.5164e-05		TADA2A	3.56314	0.276593
NR2C2	3.90445	0.000105245		MLX	3.42934	0.130288
USF1	3.89894	3.37895e-06		NR4A1	3.41332	3.32188e-05
NFIA	3.87584	1.3185e-06		NR4A2	3.23429	0.000718371
CREB1	3.83631	0.000349121		ZFTA	3.08431	3.46393e-05
USF2	3.76959	6.76882e-06		MEF2C	3.08306	0.00148516
ETV6	3.58751	3.42439e-06		TFEB	3.02775	5.22716e-06
TADA2A	3.56314	0.276593		ZNF414	2.8423	0.00759363
MBNL2	3.45343	0.00121043		ELK1	2.7985	1.08533e-06
MLX	3.42934	0.130288		PBX1	2.7764	0.00030519
NR4A1	3.41332	3.32188e-05		TFE3	2.74353	0.000343771
DUSP12	3.2721	0.228491		IRF1	2.73448	9.76535e-05
NR4A2	3.23429	0.000718371		ATF1	2.61888	5.4638e-06
CUL4B	3.20524	1.21164e-05		SALL4	2.60103	0.0116973
CUL4A	3.19182	4.67446e-06		SRF	2.5944	0.0345906
MEF2C	3.08306	0.00148516		ELK3	2.5143	0.000597877
RSRC1	3.03227	0.114707		MNT	2.50813	0.000583712
DDB1	2.95206	5.63108e-07		TAF4	2.49554	2.85258e-07
ZNHIT1	2.88674	0.00283389		PCGF5	2.48318	0.0840752
ZNF414	2.8423	0.00759363		SP4	2.46026	0.0134455
ELK1	2.7985	1.08533e-06		ATF2	2.44514	5.43403e-05
PBX1	2.7764	0.00030519		NFIL3	2.41743	1.74239e-06
IRF1	2.73448	9.76535e-05		ZEB2	2.41455	1.1491e-06
RGPD8	2.69433	0.00676559		NFE2L1	2.40215	1.18352e-05
ATF1	2.61888	5.4638e-06		ATF7	2.3817	5.19671e-07
SALL4	2.60103	0.0116973		TAF3	2.36744	1.57241e-05
SRF	2.5944	0.0345906		CLOCK	2.36134	3.11107e-07
ELK3	2.5143	0.000597877		NFIX	2.35501	0.00169367
MNT	2.50813	0.000583712		FOSL1	2.34707	0.000155552
TAF4	2.49554	2.85258e-07		IRF2	2.33996	1.42994e-05
PCGF5	2.48318	0.0840752		ZBTB21	2.32724	0.00063969
BICRAL	2.47174	1.86315e-05		NR2C1	2.31749	7.18804e-05
TUT1	2.46032	0.0176787		CTCF	2.29183	1.42087e-07
SP4	2.46026	0.0134455		TAF5	2.28564	1.11082e-05
NEPRO	2.45546	5.13703e-05		JUND	2.28539	1.84672e-05
ATF2	2.44514	5.43403e-05		TAF6	2.2692	9.52153e-07
NFIL3	2.41743	1.74239e-06		ZSCAN20	2.25016	0.00169481
ZEB2	2.41455	1.1491e-06		POU2F3	2.23471	0.056637
NFE2L1	2.40215	1.18352e-05		BACH1	2.22632	1.18447e-05
YBEY	2.40057	0.000207399		NAB2	2.22477	0.156189
BRD9	2.38887	0.00017177		TAF11	2.20041	0.000399524
TAF3	2.36744	1.57241e-05		PKNOX1	2.18493	0.00212203
CLOCK	2.36134	3.11107e-07		RXRB	2.18216	0.000312036
NFIX	2.35501	0.00169367		CIZ1	2.1635	6.02975e-06
FOSL1	2.34707	0.000155552		MITF	2.15019	0.000396766
IRF2	2.33996	1.42994e-05		CREM	2.147	0.000272209
ZBTB21	2.32724	0.00063969		GMEB1	2.13877	0.00234894
NR2C1	2.31749	7.18804e-05		ATF6B	2.11391	0.0368657
CTCF	2.29183	1.42087e-07		OGT	2.09625	6.58884e-06
TAF5	2.28564	1.11082e-05		GABPA	2.09156	0.00191813
JUND	2.28539	1.84672e-05		TCEA2	2.06694	0.469584
TAF6	2.2692	9.52153e-07		GTF2E1	2.06236	0.0754882
ZSCAN20	2.25016	0.00169481		NFE2L2	2.05464	0.000131446
POU2F3	2.23471	0.056637		SMARCE1	2.03674	5.19867e-05
BACH1	2.22632	1.18447e-05		EYA4	2.03218	0.066608
PALB2	2.21881	0.000350605		TAF8	2.01269	3.94246e-05
BMAL1	2.20305	7.27371e-05		CEBPG	1.98561	1.0177e-05
TAF11	2.20041	0.000399524		NFKB1	1.98075	0.000579641
PKNOX1	2.18493	0.00212203		CCAR2	1.95515	1.9494e-07
RXRB	2.18216	0.000312036		NR2F2	1.95026	1.1388e-07
LAS1L	2.16698	3.70128e-08		AATF	1.9462	3.4825e-06
CIZ1	2.1635	6.02975e-06		SMARCC1	1.94302	1.47367e-06
CREM	2.147	0.000272209		TAF4B	1.92828	1.16888e-06
GMEB1	2.13877	0.00234894		TRPS1	1.92032	9.31289e-09
ATF6B	2.11391	0.0368657		RXRA	1.91007	3.63028e-05
OGT	2.09625	6.58884e-06		CEBPZ	1.88697	1.3883e-05
GABPA	2.09156	0.00191813		MYBBP1A	1.86357	7.95651e-08
TTC3	2.09091	0.242533		BBX	1.86015	2.34365e-06
RNF144B	2.08241	0.00336777		TSHZ1	1.85488	0.0360705
TCEA2	2.06694	0.469584		BRD7	1.85405	3.27553e-05
GTF2E1	2.06236	0.0754882		SIX4	1.84901	7.627e-05
POP1	2.06019	4.67783e-08		JUNB	1.84774	0.00147609
NFE2L2	2.05464	0.000131446		NFATC3	1.84639	8.21759e-06
SMARCE1	2.03674	5.19867e-05		ZNF587	1.84452	0.00711165
EYA4	2.03218	0.066608		MLLT6	1.84115	0.00631855
TAF8	2.01269	3.94246e-05		CBX2	1.83707	0.00280476
BMAL2	2.00134	0.00225954		ZBTB33	1.81592	0.00308112
C14orf93	1.99877	0.000841356		GTF2IRD1	1.81192	2.31044e-06
RRP12	1.99717	8.57362e-09		FOXO3	1.79802	0.059684
CEBPG	1.98561	1.0177e-05		ZEB1	1.79597	0.0017436
PAPOLB	1.98486	0.0113706		ING1	1.79491	0.181371
NFKB1	1.98075	0.000579641		SETD2	1.79299	0.000282697
FTSJ3	1.97728	2.16382e-07		CREB5	1.78526	9.41231e-06
NSMCE2	1.97575	0.0478894		ARID2	1.77901	2.21756e-06
BRAT1	1.96197	0.0560116		KLF13	1.77685	0.06018
CCAR2	1.95515	1.9494e-07		SATB2	1.77386	0.000243319
NR2F2	1.95026	1.1388e-07		MEF2D	1.77243	9.30512e-06
AATF	1.9462	3.4825e-06		ZNF706	1.76855	2.88878e-05
SMARCC1	1.94302	1.47367e-06		ZNF143	1.75461	4.24796e-05
RPP40	1.93939	0.00107605		TAF1	1.75403	0.00643158
RPP30	1.93326	2.07572e-06		TCF3	1.74165	0.000545457
H2BC26	1.93309	0.00109582		ZBED6	1.73878	0.00125652
NOP14	1.93133	1.08102e-07		ZBTB41	1.73749	0.000120165
TAF4B	1.92828	1.16888e-06		RBX1	1.72038	2.36976e-06
NEK7	1.92632	0.273287		FOXC2	1.71393	0.0122828
DENND2B	1.92126	0.000766113		PBX2	1.70414	0.000864623
TRPS1	1.92032	9.31289e-09		ZNF131	1.69207	0.00013865
RXRA	1.91007	3.63028e-05		ZZZ3	1.69201	3.1237e-05
NOC3L	1.88945	2.20556e-06		BRCA1	1.69055	0.000670164
MYBBP1A	1.86357	7.95651e-08		TAF7	1.68441	2.3581e-05
BBX	1.86015	2.34365e-06		PPARG	1.67759	0.073398
BUB1	1.85934	0.00552303		ZNF618	1.66963	0.0116223
TSHZ1	1.85488	0.0360705		MED30	1.65302	0.06083
SIX4	1.84901	7.627e-05		GTF2A2	1.65036	0.0030567
JUNB	1.84774	0.00147609		EGR1	1.64767	0.000173516
ZNF587	1.84452	0.00711165		MED23	1.6408	4.65564e-05
MLLT6	1.84115	0.00631855		ZNF579	1.63643	3.4655e-05
POLR1H	1.83714	0.258896		TTF1	1.63535	1.6655e-06
CBX2	1.83707	0.00280476		PELP1	1.63248	5.01167e-06
GTF2IRD1	1.81192	2.31044e-06		ZNF689	1.62625	0.000390311
DDX10	1.80941	1.03413e-06		TNKS	1.62556	0.0101644
ARL6IP4	1.80131	0.0174531		ZNF512	1.62061	2.66542e-06
RIOX1	1.79977	2.01378e-05		RAD21	1.60854	4.23461e-06
FOXO3	1.79802	0.059684		MAGED1	1.6049	0.10198
ZEB1	1.79597	0.0017436		NOC2L	1.6046	0.000104315
ING1	1.79491	0.181371		ZBTB7B	1.59619	0.000282672
SETD2	1.79299	0.000282697		NCOR2	1.58497	0.00403707
CREB5	1.78526	9.41231e-06		ZHX1	1.57563	6.38263e-05
RBM34	1.78164	2.16005e-05		REPIN1	1.575	1.35526e-06
WDR18	1.78159	6.80181e-05		ATF3	1.56811	0.00108425
ARID2	1.77901	2.21756e-06		TOX4	1.56352	5.74035e-05
SATB2	1.77386	0.000243319		ELF2	1.55414	4.00359e-05
KANK2	1.77362	0.00876246		TAF9B	1.54957	7.25601e-05
MEF2D	1.77243	9.30512e-06		FOSL2	1.54926	6.60895e-05
NOL9	1.77095	0.000376848		GZF1	1.54406	2.15776e-05
TEX10	1.75646	1.73969e-07		DDX54	1.54107	1.31656e-07
ZNF143	1.75461	4.24796e-05		FOXA1	1.53581	0.000328408
DHX35	1.75424	4.39021e-05		SP1	1.52923	0.000340698
TAF1	1.75403	0.00643158		PHF12	1.52817	9.02632e-06
FANCI	1.74763	1.51095e-06		CEBPB	1.52486	1.09553e-07
ESS2	1.74535	0.0785399		GTF2I	1.52106	1.29474e-06
TCF3	1.74165	0.000545457		FOXC1	1.50712	0.000504588
ZBED6	1.73878	0.00125652		MRTFA	1.5039	0.000151212
MBD6	1.7326	9.47952e-05		TGIF1	1.49819	7.2288e-05
RBX1	1.72038	2.36976e-06		MAX	1.49501	0.00035628
POP4	1.71667	0.000289073		SMARCD1	1.48228	7.20398e-06
FOXC2	1.71393	0.0122828		EPC1	1.47811	1.964e-05
HDGFL2	1.71203	0.000585394		CHD1L	1.47769	0.000174888
DGCR8	1.71002	0.0468148		ZFX	1.46629	0.00129958
NOM1	1.70666	1.79668e-05		ESF1	1.45985	0.000375959
PBX2	1.70414	0.000864623		ELF1	1.45919	3.14451e-06
SENP3	1.69957	0.000305523		TCF12	1.45621	6.54511e-05
ZNF131	1.69207	0.00013865		YY1AP1	1.45065	0.00302656
ZZZ3	1.69201	3.1237e-05		PAXBP1	1.4494	8.61659e-07
BRCA1	1.69055	0.000670164		NR2F1	1.44853	0.0038287
CDK2AP1	1.68755	0.0031161		NFYA	1.44368	0.123194
TAF7	1.68441	2.3581e-05		ZNF711	1.44194	0.0164551
SGO2	1.68252	9.21119e-05		MED17	1.4265	6.06287e-06
PPARG	1.67759	0.073398		NUP98	1.42252	2.67641e-06
ZNF618	1.66963	0.0116223		IKZF5	1.42183	0.000506872
MED30	1.65302	0.06083		ZBTB17	1.41653	0.0368042
GTF2A2	1.65036	0.0030567		SIN3A	1.41244	4.82331e-05
EGR1	1.64767	0.000173516		CAMK2D	1.41026	0.434627
XRCC4	1.64487	0.531448		MPHOSPH8	1.4078	5.22505e-06
MED23	1.6408	4.65564e-05		ZHX3	1.40755	0.000319343
ZNF579	1.63643	3.4655e-05		SP110	1.39926	2.06297e-07
TTF1	1.63535	1.6655e-06		TFDP1	1.39446	0.00595076
INTS5	1.63475	1.22247e-05		CRTC2	1.39341	0.00344576
PELP1	1.63248	5.01167e-06		MED20	1.38959	0.0011144
PRP4K	1.63118	0.000176888		ZBTB7A	1.38626	0.00258277
ZNF689	1.62625	0.000390311		TCERG1	1.38429	9.18841e-07
TNKS	1.62556	0.0101644		TEAD4	1.37745	0.00149963
ZNF512	1.62061	2.66542e-06		PHF10	1.36665	0.000652417
SIPA1	1.62009	0.000577776		MEIS1	1.36208	0.000990061
USP28	1.61113	0.0447362		ZBED1	1.35817	0.00225513
CRAMP1	1.60986	0.000242117		ZNF609	1.35756	0.00227348
RAD21	1.60854	4.23461e-06		MED31	1.35452	0.0749066
LIG1	1.60494	0.000587817		MXI1	1.34931	0.00182961
C18orf21	1.60061	5.17564e-06		ZKSCAN2	1.34408	0.00124164
ZBTB7B	1.59619	0.000282672		ELF4	1.33946	0.00460785
RIOX2	1.59008	0.121386		ATF5	1.33503	9.54207e-05
NCOR2	1.58497	0.00403707		DNTTIP2	1.3345	1.3959e-05
RSBN1	1.58131	0.00022397		MED24	1.33399	1.85444e-06
MCM2	1.57813	1.39631e-05		ZBTB4	1.33069	0.00031012
ZHX1	1.57563	6.38263e-05		PRDM10	1.32972	2.80662e-05
REPIN1	1.575	1.35526e-06		RARG	1.32142	0.0116583
KRI1	1.57347	6.40692e-06		JUN	1.32004	0.00480219
UTP14A	1.57254	1.68135e-06		ZNF281	1.31398	0.00368929
CDC7	1.57234	0.0832158		ZNF341	1.31232	0.0147193
FBXO31	1.57195	0.00013		BEND3	1.30988	2.56913e-05
POP5	1.57107	0.103002		ZNF318	1.30435	0.00810547
ATF3	1.56811	0.00108425		CDC5L	1.29669	4.44656e-07
TOX4	1.56352	5.74035e-05		ZFP3	1.29416	0.00569062
RPP38	1.55825	4.19066e-06		ZFP91	1.29087	4.81103e-06
ELF2	1.55414	4.00359e-05		ZNF217	1.29073	4.55669e-05
MPHOSPH10	1.55034	1.10858e-08		PATZ1	1.28405	4.20239e-06
TAF9B	1.54957	7.25601e-05		TADA1	1.27789	0.00057482
FOSL2	1.54926	6.60895e-05		TAF2	1.27561	3.14497e-06
DDX41	1.5441	5.04177e-07		PRDM4	1.27073	0.000409505
GZF1	1.54406	2.15776e-05		PAXIP1	1.26624	9.86368e-05
SRRT	1.53695	2.34058e-06		RFXAP	1.26165	0.00210848
FOXA1	1.53581	0.000328408		TAF9	1.26161	6.0569e-05
FBRS	1.53295	0.003189		ZNF451	1.26129	0.00070643
BOP1	1.53257	2.37899e-05		ADNP2	1.25686	0.0111445
URB2	1.53007	6.41208e-05		ZNF148	1.25315	0.000121805
PAPOLG	1.52961	0.000554895		DEAF1	1.25276	0.00654331
SP1	1.52923	0.000340698		SREBF1	1.25258	9.30291e-05
GNL2	1.52873	2.36663e-07		KAT6B	1.25176	0.0587086
PHF12	1.52817	9.02632e-06		GMEB2	1.24953	0.00487574
NOL10	1.52773	5.73512e-05		BRD8	1.2465	2.28346e-05
CEBPB	1.52486	1.09553e-07		GON4L	1.24618	0.000283145
GTF2I	1.52106	1.29474e-06		DR1	1.24462	0.00826383
HMGN5	1.5191	0.0322316		CEBPD	1.24325	7.77193e-05
PRPF3	1.50863	1.6446e-06		LEO1	1.24278	1.69201e-05
FOXC1	1.50712	0.000504588		LIN9	1.2361	0.00149934
HJURP	1.50561	0.000936364		GABPB2	1.23606	0.0483459
MRTFA	1.5039	0.000151212		CEP290	1.23245	0.0894386
ANAPC2	1.50385	2.96897e-05		HOXA11	1.23159	0.0192406
TGIF1	1.49819	7.2288e-05		MTA2	1.22492	3.52106e-05
USP42	1.49543	2.26174e-05		CTR9	1.22336	8.44432e-06
MAX	1.49501	0.00035628		EYA1	1.22308	0.000249305
WRAP53	1.49406	0.00617269		PBRM1	1.22301	7.58005e-05
MSH6	1.49024	0.000110838		MGA	1.22194	8.11923e-05
ZC3H3	1.48594	1.68802e-05		SMARCA4	1.22049	0.000222208
FBXO46	1.48306	0.174878		MIS18BP1	1.21808	0.000582892
SMARCD1	1.48228	7.20398e-06		SUPT7L	1.21311	3.64932e-05
UTP3	1.47961	1.15495e-05		REST	1.21261	0.000202261
EPC1	1.47811	1.964e-05		NSD2	1.20985	8.33935e-06
CHD1L	1.47769	0.000174888		MED15	1.20854	0.000976025
RSBN1L	1.46932	0.000322937		ZFHX3	1.20597	0.00714767
ZFX	1.46629	0.00129958		KDM1B	1.20596	4.43785e-05
ANAPC10	1.46435	0.0466781		ZBTB43	1.20527	0.00858339
ESF1	1.45985	0.000375959		SENP1	1.20335	0.000261378
ELF1	1.45919	3.14451e-06		MYC	1.19325	0.000295445
TCF12	1.45621	6.54511e-05		ELK4	1.19264	0.0934684
ETAA1	1.45255	0.0267313		WIZ	1.18816	1.15097e-05
NUP153	1.45129	9.23404e-06		BAZ1B	1.18611	3.01506e-07
YY1AP1	1.45065	0.00302656		GNL3	1.18352	1.44128e-05
PAXBP1	1.4494	8.61659e-07		ZSCAN5A	1.18247	2.16668e-05
NR2F1	1.44853	0.0038287		CNBP	1.18212	4.16913e-05
SUGP2	1.44813	3.89023e-07		TAF10	1.17432	0.00159941
NFYA	1.44368	0.123194		ZNF629	1.17239	0.00937603
TMEM35B	1.4425	0.342967		ZNF320	1.17223	0.00128945
ZNF711	1.44194	0.0164551		ZBTB11	1.16843	2.34652e-05
PDS5A	1.44124	4.89228e-06		ATF7IP	1.16716	0.310021
UIMC1	1.43859	0.00687426		TAF12	1.1629	0.0676998
ZC3H11A	1.43733	1.42439e-06		RFX1	1.15556	7.56968e-05
RPP25	1.43487	0.00280494		KLF5	1.15461	0.000505901
NAT10	1.43293	4.13888e-07		RBM15	1.15414	7.28554e-06
BCL7B	1.4292	0.00166583		CHD6	1.15349	0.000205552
MED17	1.4265	6.06287e-06		ZMYM2	1.15038	9.83637e-05
IKZF5	1.42183	0.000506872		FOXP4	1.14138	0.0607448
NUP133	1.41923	7.15533e-06		FOXK1	1.13804	8.14674e-07
INTS8	1.41707	0.000650253		TIMELESS	1.13317	0.000972865
SIN3A	1.41244	4.82331e-05		FOXK2	1.13151	3.79595e-05
STAG2	1.40947	2.48585e-06		SMARCA2	1.13002	3.58224e-05
MPHOSPH8	1.4078	5.22505e-06		HOXC13	1.12634	0.0012283
ZHX3	1.40755	0.000319343		RLIM	1.12337	0.0191201
SP110	1.39926	2.06297e-07		DDX20	1.1227	0.00208996
FAM111B	1.39488	6.93456e-06		YEATS2	1.1209	0.000554341
TFDP1	1.39446	0.00595076		NR3C1	1.12087	0.000186628
CRTC2	1.39341	0.00344576		ARNT	1.11928	0.00037604
RBM25	1.3922	7.03881e-05		KDM2A	1.11481	1.46568e-05
SYNE3	1.39199	5.62126e-05		CCNT1	1.10704	0.0149157
ZBTB7A	1.38626	0.00258277		ZKSCAN8	1.10535	0.00159194
TFIP11	1.38443	0.000162055		ZNF292	1.1053	0.0219461
TCERG1	1.38429	9.18841e-07		NFXL1	1.10326	0.011974
SMC3	1.37819	2.21579e-06		NPAS2	1.10171	0.0101365
TEAD4	1.37745	0.00149963		ZNF207	1.09899	0.0014708
VRK3	1.37555	0.00265039		LYAR	1.09584	1.07966e-05
SCFD2	1.37221	0.585181		ELOF1	1.09368	0.00660821
SGPP1	1.37189	0.344546		EPC2	1.09367	0.0107052
DDX51	1.36986	1.31483e-06		SIX2	1.09057	0.000825163
UTP20	1.3669	4.79165e-07		CCAR1	1.08693	6.20836e-06
PHF10	1.36665	0.000652417		MAFG	1.08653	0.0011988
SURF6	1.36576	0.000400901		ADNP	1.08167	5.02617e-06
ZNF330	1.3622	0.172384		HCFC1	1.07942	5.84313e-05
MEIS1	1.36208	0.000990061		CREB3L2	1.07808	0.0323934
ZNF609	1.35756	0.00227348		SOX13	1.0766	4.25585e-06
SGO1	1.3563	3.57292e-06		ZNF22	1.07509	0.000260643
MED31	1.35452	0.0749066		MED29	1.07504	0.152296
MXI1	1.34931	0.00182961		SUPT16H	1.07294	0.00012381
ANLN	1.34671	7.35419e-06		HELLS	1.07268	0.000241459
ZKSCAN2	1.34408	0.00124164		L3MBTL2	1.06933	8.15814e-05
AKAP8	1.34183	0.000101385		PHF20	1.06882	0.000431766
WDR3	1.34177	1.57924e-05		E4F1	1.06628	0.000209184
TPX2	1.34048	1.48617e-06		GTF2A1	1.06515	0.00131453
ELF4	1.33946	0.00460785		MLLT10	1.05942	0.0032051
RPF1	1.33927	6.82103e-05		MLXIP	1.05684	0.103393
XPC	1.33831	7.02837e-06		FHOD1	1.05652	0.000196156
NDC1	1.3361	6.21978e-05		EHMT2	1.0532	1.80448e-05
MAD1L1	1.33541	1.12966e-05		NPAT	1.05232	0.00038414
ATF5	1.33503	9.54207e-05		SMARCC2	1.04581	3.69257e-05
DNTTIP2	1.3345	1.3959e-05		MYBL1	1.0416	0.011909
TMPO	1.3335	2.15574e-06		TTF2	1.03377	3.79577e-05
ZBTB4	1.33069	0.00031012		EMSY	1.03153	0.00363902
PRDM10	1.32972	2.80662e-05		PRPF6	1.03075	2.17351e-05
SMC2	1.32751	1.14654e-06		HIVEP1	1.02639	0.0866284
GRWD1	1.32259	0.00269972		KDM6A	1.02581	0.00468875
LENG8	1.32151	6.68555e-06		E2F6	1.02542	0.0189674
RARG	1.32142	0.0116583		MAFK	1.02419	2.05743e-05
JUN	1.32004	0.00480219		ZNF777	1.02334	0.00899896
COIL	1.31852	0.00310588		RFX2	1.02323	0.000126513
ZNF281	1.31398	0.00368929		SMARCA5	1.02191	7.20803e-06
ZNF341	1.31232	0.0147193		MTA1	1.02015	0.000498303
USP36	1.31146	1.50729e-05		CHD3	1.01961	4.68561e-05
DNAJC9	1.31008	0.000236943		NRF1	1.01719	0.000779418
BEND3	1.30988	2.56913e-05		PIAS4	1.01573	0.00156778
ZNF318	1.30435	0.00810547		CDK1	1.01537	0.00121341
ZC3H18	1.30316	4.46397e-05		ZBTB40	1.01372	0.000160239
POLR2L	1.30169	0.00110193		CCNK	1.01275	0.00764923
XPO5	1.29792	0.000310363		ZNF35	1.01201	0.16692
PAK1IP1	1.29681	2.01277e-05		NOL11	1.01183	6.31468e-05
CDC5L	1.29669	4.44656e-07		ZNF746	1.01104	0.00984263
NOP56	1.29187	1.8357e-05		POU2F1	1.0092	0.000212575
CDKN2A	1.29169	0.000707484		FOXP1	1.00896	0.000580073
ZFP91	1.29087	4.81103e-06		THRAP3	1.00822	0.000126451
ZNF217	1.29073	4.55669e-05		SMARCD2	1.00631	5.36382e-05
LSM10	1.29022	0.0486926		ORC2	1.00615	0.00711837
C7orf50	1.28831	6.93281e-05		WDHD1	1.00192	0.000234613
INTS6	1.2872	1.7654e-06		MED25	1.00188	0.236513
PATZ1	1.28405	4.20239e-06		GATAD2B	1.0008	6.86844e-05
LMNB1	1.28205	1.58942e-06		SUPT20H	0.997302	0.000240142
TADA1	1.27789	0.00057482		THOC5	0.994397	0.000101401
LRWD1	1.27479	0.00602548		SAFB	0.993656	7.12125e-05
CBX1	1.27194	0.48187		RCOR2	0.987698	0.025092
PRDM4	1.27073	0.000409505		RB1	0.986054	8.52252e-05
PAXIP1	1.26624	9.86368e-05		ATAD2	0.985363	0.00418291
RFXAP	1.26165	0.00210848		KAT2A	0.983519	0.000236282
TAF9	1.26161	6.0569e-05		ALX4	0.981177	0.00121331
ZNF451	1.26129	0.00070643		TBX3	0.975717	5.19556e-06
MTBP	1.25953	9.46948e-06		MED26	0.974606	0.0311839
MCM4	1.25796	0.000108154		MED1	0.970494	0.000820825
TMEM209	1.2552	0.00028038		TFAP4	0.964442	0.000252394
SMPD4	1.25489	1.20668e-05		MBD1	0.962515	0.00256326
ZNF148	1.25315	0.000121805		ZKSCAN1	0.958847	5.16546e-05
ZFAND6	1.25311	0.528468		RNF20	0.95822	2.10612e-05
DEAF1	1.25276	0.00654331		SP100	0.95791	0.000524522
KAT6B	1.25176	0.0587086		TFCP2	0.951373	0.00218515
PHC3	1.2512	4.87396e-06		ZNF471	0.95113	0.346999
CHAMP1	1.25088	3.53793e-06		ZNF710	0.949455	0.00698792
GMEB2	1.24953	0.00487574		ZNF142	0.947703	0.00155859
CDCA2	1.24848	3.36557e-06		ABL1	0.946594	0.00222271
BRD8	1.2465	2.28346e-05		ZBTB38	0.944474	0.0124378
GON4L	1.24618	0.000283145		ZNF316	0.944276	0.000321653
NBN	1.24602	3.85318e-06		SIRT6	0.941685	0.0569636
FANCF	1.24571	0.0167145		TEAD3	0.937718	0.023935
LLPH	1.24564	0.000123446		ZBTB48	0.934388	0.000282274
DR1	1.24462	0.00826383		ZNF280C	0.934327	0.000133429
CEBPD	1.24325	7.77193e-05		MZF1	0.93408	0.000460485
LEO1	1.24278	1.69201e-05		KCTD1	0.929216	0.0383953
MCM3	1.24108	8.57753e-05		EP400	0.927842	1.08272e-05
WAPL	1.23842	0.000297041		KLF3	0.925471	0.0101177
RANBP9	1.23831	0.00107419		RLF	0.924758	0.000557146
LIN9	1.2361	0.00149934		HDAC3	0.922792	0.0345661
GABPB2	1.23606	0.0483459		MAFF	0.919219	0.00272926
NUP107	1.23373	0.00156507		ZNF740	0.91732	7.82427e-05
CMTR1	1.23246	0.107341		SNAI1	0.908704	0.228903
HOXA11	1.23159	0.0192406		FOS	0.908124	0.0261728
USP48	1.23017	4.66575e-05		UTP4	0.907004	0.000125026
LBR	1.22959	1.78735e-05		EYA3	0.906386	0.051734
MTA2	1.22492	3.52106e-05		REXO4	0.903064	1.77175e-05
CTR9	1.22336	8.44432e-06		PLK1	0.89942	0.001787
EYA1	1.22308	0.000249305		GLIS2	0.897962	0.0104614
PBRM1	1.22301	7.58005e-05		SON	0.896205	0.00219895
MORC3	1.22196	2.00171e-05		PHF8	0.896146	6.91093e-05
MGA	1.22194	8.11923e-05		ZNF385A	0.892885	0.00632599
SMARCA4	1.22049	0.000222208		DNMT1	0.892657	3.33022e-06
MIS18BP1	1.21808	0.000582892		ASH1L	0.890973	0.00838781
DDX42	1.21508	2.42635e-05		PARP12	0.890452	0.148467
SUPT7L	1.21311	3.64932e-05		KHSRP	0.88731	0.000142044
REST	1.21261	0.000202261		ZBTB45	0.887279	0.00221348
NSD2	1.20985	8.33935e-06		C1D	0.886853	0.00389475
MED15	1.20854	0.000976025		MBD3	0.886783	0.00116154
MCM6	1.20764	2.14506e-06		ZFAT	0.881246	0.0101495
SYMPK	1.20637	8.92003e-05		MYBL2	0.881024	0.00428447
ZFHX3	1.20597	0.00714767		KAT2B	0.880722	0.0434864
KDM1B	1.20596	4.43785e-05		SAP30	0.878517	0.0192678
XPO1	1.20528	1.71295e-05		KDM5A	0.877095	0.00257328
ZBTB43	1.20527	0.00858339		CTBP2	0.874003	0.000282817
NUP155	1.20491	6.03249e-06		CXXC1	0.872933	1.84875e-05
SENP1	1.20335	0.000261378		RYBP	0.870881	0.000141239
KANSL3	1.19961	0.00224959		RFX3	0.86999	0.159177
IPO8	1.19942	0.0565674		MED14	0.867216	0.000371774
PDS5B	1.19732	1.29632e-05		MED13	0.863434	0.00875817
MYC	1.19325	0.000295445		SSRP1	0.86297	0.00021794
ELK4	1.19264	0.0934684		BRD2	0.859437	0.00113345
MRE11	1.19178	3.77426e-05		DHX33	0.859281	5.76901e-05
WASHC4	1.18996	0.00502181		TADA2B	0.857239	0.00525342
WIZ	1.18816	1.15097e-05		TERF2	0.8534	9.98309e-05
CSTF2	1.18798	0.000948939		SSU72	0.851872	0.00529846
THOC2	1.18783	2.69027e-05		ACTL6A	0.845126	0.000134274
BAZ1B	1.18611	3.01506e-07		ARID5B	0.843818	0.00026356
NCAPG2	1.18483	9.2362e-05		ZNF668	0.84149	0.000146144
GNL3	1.18352	1.44128e-05		GATAD2A	0.840872	0.002772
AAAS	1.18254	0.000518374		TFAP2A	0.839924	0.000281929
RAVER1	1.18251	2.62532e-05		PAF1	0.83775	0.000556312
ZSCAN5A	1.18247	2.16668e-05		TAF1C	0.837079	0.037057
CNBP	1.18212	4.16913e-05		AHR	0.835275	0.00225717
ZMYM3	1.18148	2.63652e-06		ZNF652	0.835001	0.000341845
ZMYM4	1.17903	6.34463e-05		THAP4	0.834128	0.000320567
SCAF1	1.17711	0.00082258		ZFP37	0.833736	0.00266776
FANCD2	1.17687	4.60419e-05		TFAP2C	0.833083	0.000235582
HDGFL3	1.17659	0.000411045		TAF6L	0.832518	0.000392668
TAF10	1.17432	0.00159941		CHTOP	0.831814	2.61484e-06
GTF3C3	1.17363	0.000186489		PML	0.828661	0.000370266
ZNF629	1.17239	0.00937603		SAFB2	0.828497	1.06559e-05
ZNF320	1.17223	0.00128945		ZBTB24	0.828407	0.000144365
BCL7C	1.16913	0.00126312		BRMS1L	0.82822	0.577572
ZBTB11	1.16843	2.34652e-05		ZHX2	0.82749	0.000547821
ATF7IP	1.16716	0.310021		NR2F6	0.824426	0.23076
UBE2E1	1.16567	0.0396894		CDK8	0.824234	0.0407068
POGZ	1.16251	3.48747e-05		TFB2M	0.818954	0.00414038
POP7	1.16154	0.00416876		CENPU	0.814955	0.068476
SMARCA1	1.16119	7.96199e-05		ICE2	0.814829	0.00177709
POLR2B	1.15906	7.32984e-05		EZH2	0.813549	0.00132535
RFX1	1.15556	7.56968e-05		XRN2	0.808974	0.000159941
KLF5	1.15461	0.000505901		TBP	0.808386	0.00305171
RBM15	1.15414	7.28554e-06		TEAD1	0.806878	0.00465806
CHD6	1.15349	0.000205552		PRDM2	0.806409	0.00046147
SEC11A	1.15216	0.0224589		ZNF335	0.798553	0.00268694
ORC5	1.15144	6.52933e-05		ABT1	0.797664	0.012966
MMS22L	1.14999	4.95025e-05		ZXDC	0.797089	0.0252196
THOC1	1.14914	7.42283e-05		ZNF628	0.796518	0.107356
RNF40	1.14814	0.000157603		DOT1L	0.795348	0.00234456
RANGAP1	1.14685	8.92254e-06		MRGBP	0.794663	0.0111006
CENPP	1.14501	0.0816881		ZNF317	0.789866	0.00101019
RMI1	1.14442	1.39936e-05		SAP130	0.789055	0.000421635
SHCBP1	1.14229	0.00243863		SP140L	0.789053	0.00910364
FOXP4	1.14138	0.0607448		DNAJA3	0.788219	0.00392923
FOXK1	1.13804	8.14674e-07		ZNF512B	0.787307	0.000457425
INTS4	1.13784	8.13082e-06		TXLNG	0.785857	0.00984945
TIMELESS	1.13317	0.000972865		SIN3B	0.785419	7.01823e-05
FOXK2	1.13151	3.79595e-05		ZNF627	0.782494	0.00812865
SMARCA2	1.13002	3.58224e-05		HIC2	0.782088	0.135967
ZC3H8	1.12686	0.00597307		KAT5	0.78205	0.0318752
CACTIN	1.12384	0.00147518		GATAD1	0.777156	0.0178757
ZC3HC1	1.12373	1.45098e-05		JDP2	0.774846	0.000763314
RLIM	1.12337	0.0191201		YAF2	0.773776	0.00183687
DDX20	1.1227	0.00208996		ZNF516	0.77269	0.00288952
POLD1	1.12161	5.33671e-06		BRD1	0.772004	0.00103922
YEATS2	1.1209	0.000554341		XRCC6	0.770838	6.46721e-06
ARNT	1.11928	0.00037604		SFSWAP	0.770712	0.000305011
ORC1	1.11921	0.000167175		PRDM15	0.768065	0.00012513
ECT2	1.11678	0.000160161		KDM1A	0.763363	0.00887578
DDX27	1.11647	0.000577762		TRIM28	0.762519	0.000228831
KDM2A	1.11481	1.46568e-05		KLF16	0.760424	0.00145053
ACSL3	1.11097	9.44496e-05		ZNF692	0.75978	0.0124819
CCNT1	1.10704	0.0149157		BAZ2B	0.756728	0.0010123
ZKSCAN8	1.10535	0.00159194		ZMYND8	0.752956	0.000429728
ZNF292	1.1053	0.0219461		MYNN	0.751569	0.00121664
NFXL1	1.10326	0.011974		DMAP1	0.748799	0.00293771
WRNIP1	1.10262	0.000413391		ZNF146	0.748041	0.000258463
NPAS2	1.10171	0.0101365		EHMT1	0.746088	9.77051e-06
ZNF207	1.09899	0.0014708		SIX5	0.745564	0.262136
RCL1	1.09886	0.000273236		MORF4L1	0.744868	0.000127372
NCAPD3	1.09787	0.000423288		BHLHE40	0.743127	0.00743487
IFRD2	1.09622	0.0100234		SMARCB1	0.742092	0.0011113
LYAR	1.09584	1.07966e-05		IRF2BPL	0.740515	0.0256531
EPC2	1.09367	0.0107052		TFAP2B	0.73742	0.452648
PRCC	1.09136	0.00669851		ZNF24	0.734551	0.00251332
SIX2	1.09057	0.000825163		SF1	0.73417	0.000462447
NOP53	1.08964	1.14879e-06		ERCC3	0.731381	0.00129151
AFG2B	1.08785	0.000843509		ZSCAN25	0.724496	0.000726936
CCAR1	1.08693	6.20836e-06		MED11	0.724384	0.0360099
RFC1	1.08482	0.000222803		SP3	0.724116	0.0183067
ACIN1	1.08295	5.3745e-05		NKRF	0.722369	0.000143962
ADNP	1.08167	5.02617e-06		KDM4B	0.720651	0.0459718
HCFC1	1.07942	5.84313e-05		HCFC2	0.720319	7.71692e-05
SLX9	1.07702	0.000847164		DEK	0.719066	9.5921e-06
SOX13	1.0766	4.25585e-06		RBPJ	0.718012	0.00303985
MLH1	1.07605	0.000112944		MED4	0.716938	0.00192873
ZNF22	1.07509	0.000260643		MED6	0.716913	0.017692
MED29	1.07504	0.152296		MED19	0.713754	0.257001
CPSF2	1.07487	4.16095e-06		SUPT3H	0.713535	0.165241
RPL27	1.07424	2.6993e-05		ATF4	0.712415	0.0141069
SUPT16H	1.07294	0.00012381		SND1	0.704134	0.000225863
HELLS	1.07268	0.000241459		BRMS1	0.70222	0.00256825
DHX16	1.06977	0.00735797		AFF4	0.698598	0.00581219
L3MBTL2	1.06933	8.15814e-05		RECQL5	0.698278	0.000108977
DCLRE1A	1.06927	3.91632e-05		ZNF174	0.696869	0.00789293
PHF20	1.06882	0.000431766		YY1	0.696698	2.19044e-05
E4F1	1.06628	0.000209184		ZNF219	0.694833	7.29495e-05
UBFD1	1.06594	0.423423		MIER1	0.693248	0.00175713
GTF2A1	1.06515	0.00131453		SUZ12	0.690878	0.000413119
GTF3C4	1.06434	7.9935e-06		TOP1	0.690491	0.000831962
MAU2	1.06151	7.38959e-05		ZNF184	0.690476	0.00356728
MLLT10	1.05942	0.0032051		DAPK3	0.68975	0.357094
FAAP100	1.05832	0.00211397		KLF4	0.689067	0.00119317
ZC3H14	1.05773	4.60827e-05		ZNF664	0.686269	8.91153e-05
QSER1	1.0573	0.00609102		LRPPRC	0.684035	9.20601e-05
SDAD1	1.05716	2.52822e-05		CUX1	0.682225	0.000505434
RPUSD3	1.05679	0.321451		NCOR1	0.676141	0.0699704
ERCC1	1.05666	0.491703		GTF2H1	0.676077	0.0333367
NOP58	1.05578	1.94803e-05		ILK	0.675989	0.0227825
DHX37	1.05545	8.68659e-05		DDX39B	0.674341	0.000105952
NOP9	1.05476	3.72724e-05		ZNF865	0.671553	0.130337
EHMT2	1.0532	1.80448e-05		ENY2	0.671299	0.01129
UHRF1	1.05279	3.91655e-05		BPTF	0.67112	7.07151e-05
PSMG2	1.05242	0.309784		ZNF592	0.670495	0.000526002
NPAT	1.05232	0.00038414		SNAPC4	0.670456	0.00307767
PRR14L	1.04892	0.0101127		ZNF687	0.669077	0.000330307
NAIF1	1.04818	0.00268091		ATF6	0.665291	0.122986
SETD5	1.04768	8.63585e-05		MRTFB	0.662951	0.0330409
SMARCC2	1.04581	3.69257e-05		ZNF771	0.662479	0.00430827
BAP1	1.04489	0.000477788		SFMBT2	0.658625	0.00133307
DIS3	1.04368	1.51884e-05		PIAS1	0.658241	0.0379652
NUP35	1.04237	0.000532943		PPARD	0.653228	0.0122424
API5	1.04208	0.00179978		ZNF274	0.651597	0.0861579
MYBL1	1.0416	0.011909		DDX17	0.650897	9.35579e-06
GTPBP4	1.04018	1.68301e-05		NSD3	0.646981	0.00319137
GTF3C2	1.04013	2.34035e-05		HEATR1	0.645222	7.8054e-05
RFWD3	1.03759	0.329102		CDK9	0.643261	0.00347521
NUP85	1.03593	0.00100175		KAT8	0.642589	0.0216605
SUN1	1.03539	0.000266637		ZNF354A	0.64251	0.0210542
MBNL1	1.03413	0.0025824		FIZ1	0.641316	0.0205925
EMSY	1.03153	0.00363902		MED13L	0.64078	0.118945
PRPF6	1.03075	2.17351e-05		CENPF	0.638275	0.339661
QRICH1	1.03061	0.000765437		NFAT5	0.637849	0.000979838
DDX56	1.03044	0.00146892		RFX5	0.635597	0.00469942
CSTF2T	1.03035	0.00379128		SS18	0.633413	0.054533
NVL	1.03002	7.88353e-05		NSD1	0.633197	0.00587072
ATR	1.02959	0.0326835		GATA6	0.630903	0.177784
STEEP1	1.02941	0.0180097		TADA3	0.630357	0.099729
RBM26	1.02921	0.000202178		MED12	0.628703	0.00100526
MYPOP	1.02854	0.0034576		RPRD1A	0.627493	0.169268
CRIPT	1.02753	0.0141742		LRIF1	0.62728	0.000289177
HIVEP1	1.02639	0.0866284		ZNF532	0.623946	0.0128254
KDM6A	1.02581	0.00468875		CDC73	0.623586	8.35922e-06
E2F6	1.02542	0.0189674		BAZ2A	0.622984	0.000104409
MAFK	1.02419	2.05743e-05		SETD1A	0.621896	0.0411041
ZNF777	1.02334	0.00899896		ZFP64	0.620795	0.00103023
ORC3	1.02205	2.05169e-05		SRFBP1	0.617877	0.0553045
PWP2	1.02192	0.000632734		TRERF1	0.615392	0.00703944
SMARCA5	1.02191	7.20803e-06		BCLAF1	0.614325	0.000134657
PHF20L1	1.02149	0.00341963		CHD8	0.609709	0.0138784
MTA1	1.02015	0.000498303		HMGXB4	0.607541	0.0149684
CHD3	1.01961	4.68561e-05		MED16	0.606883	0.0171081
RPRD2	1.01959	0.000186193		HTATSF1	0.606637	0.00471467
MCM7	1.01742	3.36912e-05		SGF29	0.600842	0.0379176
RIF1	1.01734	0.000371565		TFAM	0.599146	1.6684e-05
NRF1	1.01719	0.000779418		VEZF1	0.598859	0.00617535
NRM	1.01711	0.0491009		EZH1	0.597758	0.0130233
PIAS4	1.01573	0.00156778		TP53BP1	0.597744	0.00326579
SLC3A2	1.0141	9.81154e-05		RRN3	0.596901	0.00327568
ZBTB40	1.01372	0.000160239		ACTN1	0.595951	5.76388e-05
CCNK	1.01275	0.00764923		NCOA6	0.594023	0.038408
MEPCE	1.01255	0.0325485		KMT5B	0.593728	0.00207623
ZNF35	1.01201	0.16692		ATRX	0.592569	0.0347711
NOL11	1.01183	6.31468e-05		CDK13	0.591071	0.00986704
WBP11	1.01092	9.27005e-07		RBBP7	0.590061	4.77522e-05
POU2F1	1.0092	0.000212575		DAXX	0.587891	0.00445766
FOXP1	1.00896	0.000580073		SCMH1	0.585846	0.0197595
THRAP3	1.00822	0.000126451		NUP62	0.585604	0.0315864
RBM10	1.00812	3.59918e-06		ERBIN	0.585387	0.228379
DUSP23	1.00779	0.194176		HIRA	0.585056	0.000162508
SMARCD2	1.00631	5.36382e-05		CDK12	0.583381	0.101786
ORC2	1.00615	0.00711837		ZNF45	0.582032	0.334929
WDHD1	1.00192	0.000234613		SKI	0.58094	0.000688419
MED25	1.00188	0.236513		THAP11	0.579312	0.00940814
STK26	1.00096	0.196307		BUD31	0.577552	0.000660364
GATAD2B	1.0008	6.86844e-05		PUF60	0.573595	3.14624e-05
XPO6	0.998708	0.0011366		SMARCAL1	0.573101	0.00910852
METTL16	0.998565	0.00135745		ZNF230	0.572135	0.0284395
SUPT20H	0.997302	0.000240142		PLRG1	0.569777	0.00330815
CDC27	0.995353	0.000858648		KMT2B	0.565622	7.15448e-05
THOC5	0.994397	0.000101401		HMGA1	0.560515	0.0906719
SAFB	0.993656	7.12125e-05		ZNF653	0.558932	0.0203166
DDX31	0.991902	5.88373e-06		H1-5	0.552577	0.0111977
NOC4L	0.991102	0.00033524		NELFE	0.551998	0.716631
AHDC1	0.989324	5.41639e-05		FOXL2	0.550639	0.000366124
EBNA1BP2	0.989109	1.44449e-05		ZNF189	0.550441	0.00628649
NUF2	0.989073	0.189359		ZNF800	0.550203	0.000669812
RCOR2	0.987698	0.025092		PCGF6	0.550159	0.122443
PPP1R10	0.986995	4.96299e-05		DCAF1	0.546872	0.0255858
KNOP1	0.986424	0.000267858		MEN1	0.541463	0.000275995
RB1	0.986054	8.52252e-05		E2F3	0.538204	0.00335399
ATAD2	0.985363	0.00418291		UBP1	0.536222	0.0141149
WDR36	0.985072	4.53429e-05		PITX1	0.535614	0.17422
MCM5	0.98303	3.99426e-05		MECP2	0.535347	0.000222233
FANCA	0.982717	0.111565		KMT2D	0.535323	0.0801701
PHC1	0.981769	0.0142823		AURKB	0.534537	6.39014e-05
RNGTT	0.981694	0.000731972		ZNF581	0.534402	0.430702
ALX4	0.981177	0.00121331		SNIP1	0.531325	0.513478
SNRPC	0.979128	0.0225649		BLM	0.519905	0.0011295
RCC1	0.977025	0.0028307		ARGLU1	0.518013	0.0016958
TBX3	0.975717	5.19556e-06		RBBP4	0.517723	0.000129427
MED26	0.974606	0.0311839		GTF2B	0.516588	0.117307
DDX23	0.974547	6.06144e-06		BRD3	0.508449	0.144288
AGTPBP1	0.97097	0.00586388		MMS19	0.504365	0.01604
MED1	0.970494	0.000820825		MED27	0.50128	0.055091
C12orf43	0.970347	0.00360805		ETV3	0.497643	0.154525
STAG1	0.9696	0.00322977		SUDS3	0.492141	0.00198115
PMS2	0.96713	0.00298863		ZGPAT	0.489816	0.0192238
MSH2	0.966499	4.39534e-05		SUPT5H	0.486611	0.000213641
RPF2	0.963879	0.000577601		FOSB	0.482813	0.0949191
EXOSC9	0.963742	0.00623569		CCDC59	0.482334	0.0141234
MBD1	0.962515	0.00256326		ZNF593	0.480919	0.0119993
TMA7	0.961935	0.155404		WAC	0.477622	0.00813258
ZKSCAN1	0.958847	5.16546e-05		TRRAP	0.477329	0.00378923
RNF20	0.95822	2.10612e-05		ZNF622	0.473508	0.0826275
SP100	0.95791	0.000524522		GTF2H3	0.472988	0.0570063
PARN	0.955062	0.00037752		ZNF462	0.470874	0.0251835
DHX8	0.954287	0.00017067		TAF5L	0.467736	0.00411755
RBBP6	0.953345	0.00146041		ZBED4	0.464022	0.00123465
SMC6	0.953319	0.00226017		RCOR1	0.459542	0.00226783
FBXL6	0.951661	0.000847458		CENPB	0.459445	0.0061462
TFCP2	0.951373	0.00218515		SPEN	0.455886	0.00587229
ZNF471	0.95113	0.346999		NR0B2	0.455341	0.370633
IMP3	0.949222	6.0752e-05		ZNF574	0.454803	0.0369589
ZNF142	0.947703	0.00155859		DDX1	0.454632	6.35705e-06
ABL1	0.946594	0.00222271		RUVBL1	0.452795	0.00154233
ZBTB38	0.944474	0.0124378		ZNF646	0.451505	0.0807692
OGFOD3	0.943788	0.404362		CBX5	0.449998	0.0448285
SIRT6	0.941685	0.0569636		FOXF2	0.449334	0.515886
EXOSC1	0.940335	0.0180532		AHCTF1	0.447105	3.40045e-06
DHX34	0.939122	0.00676844		KDM4D	0.439434	0.0479445
SUN2	0.938653	0.000279171		H1-3	0.436941	0.00495692
ORC6	0.938329	0.173659		CHD1	0.436096	0.235186
ZBTB48	0.934388	0.000282274		ASH2L	0.432444	0.000244457
ZNF280C	0.934327	0.000133429		CDYL	0.428128	0.005852
MZF1	0.93408	0.000460485		ACTN2	0.425962	0.000121959
NACC1	0.932409	0.00180347		RAN	0.420311	0.0218738
PUM3	0.93222	7.04987e-06		APEX1	0.418806	0.0100013
MAK16	0.930272	0.00610595		TASOR	0.416707	0.0107644
NHEJ1	0.930143	0.0253216		PIAS2	0.414932	0.119508
ARL6IP6	0.929551	0.00476663		ARID4B	0.413726	0.618648
KCTD1	0.929216	0.0383953		PRDM1	0.412128	0.0197252
EP400	0.927842	1.08272e-05		MORF4L2	0.40982	0.112523
KLF3	0.925471	0.0101177		ZNF205	0.409819	0.0702341
RLF	0.924758	0.000557146		HOMEZ	0.409478	0.0582298
AKAP8L	0.923728	0.0010585		ZNF3	0.408103	0.383609
HDAC3	0.922792	0.0345661		RBBP5	0.406693	8.9028e-05
TOE1	0.921508	0.00122962		RNF2	0.405855	0.0406977
TNPO1	0.921052	0.000382145		RBM15B	0.404731	0.00565287
ATAD5	0.920619	0.000476073		MBTD1	0.401463	0.591933
MAFF	0.919219	0.00272926		NIPBL	0.400541	0.0319288
PWWP2A	0.91798	0.00021509		KLF10	0.400317	0.13509
UTP6	0.91752	0.000273838		RAI1	0.400151	8.87762e-05
ZNF740	0.91732	7.82427e-05		CHD4	0.395682	0.00155193
NCAPH2	0.916162	0.000805993		NPM1	0.394339	0.0127971
CENPN	0.915084	0.00092862		BASP1	0.391831	0.00110633
ANAPC5	0.912763	0.00168962		THAP12	0.391636	0.136513
SLU7	0.908947	0.00149955		SRCAP	0.388092	0.0419968
SNAI1	0.908704	0.228903		RCOR3	0.380157	0.0099054
SCAF4	0.908571	0.0138851		CXXC5	0.379878	0.0150694
FOS	0.908124	0.0261728		TERF2IP	0.376434	0.00409885
SLFN5	0.907322	0.000343842		TWIST2	0.375419	0.0269045
UTP4	0.907004	0.000125026		ZNF483	0.374282	0.113055
EYA3	0.906386	0.051734		EED	0.37374	0.000254938
SMC5	0.905524	0.000558617		SMAD4	0.37372	0.00349223
GNL3L	0.90533	5.66055e-05		ERCC2	0.372882	0.000157676
NOP2	0.904409	6.72757e-05		LCOR	0.368955	0.0191038
REXO4	0.903064	1.77175e-05		TBL1XR1	0.367702	0.00526446
EME1	0.898122	0.000966128		ZNF638	0.361247	0.000486832
ESPL1	0.898119	0.0781994		MAZ	0.361165	0.0146218
USP7	0.898093	1.51064e-05		MED10	0.359706	0.132407
GLIS2	0.897962	0.0104614		CDK2	0.356665	0.129489
SON	0.896205	0.00219895		HDAC2	0.351295	0.00059421
PHF8	0.896146	6.91093e-05		DPF2	0.350144	0.0539229
TBL3	0.895836	0.000213134		CDK7	0.348204	0.375672
ZDHHC5	0.893608	0.00110678		DNAJC2	0.342962	0.0348038
DNMT1	0.892657	3.33022e-06		ARID1A	0.342676	0.124059
POM121	0.891286	0.223683		NAA15	0.341972	0.00133006
TRMT1L	0.890917	0.00156013		SUMO1	0.340594	0.650133
PARP12	0.890452	0.148467		GTF2H4	0.339435	0.052605
HMGN3	0.890378	0.000488141		KMT2A	0.335109	9.90259e-05
KHSRP	0.88731	0.000142044		LIN54	0.333599	0.111234
C1D	0.886853	0.00389475		ISL2	0.333575	0.310265
MBD3	0.886783	0.00116154		CHD9	0.332665	0.111595
LMNB2	0.886386	0.00113394		ZNF121	0.331961	0.51979
MSH3	0.884315	0.000622002		HOXA5	0.331523	0.075912
CLP1	0.881632	0.0706119		DHX36	0.328042	0.0007087
FANCL	0.881481	0.406962		MNAT1	0.322855	0.271544
ZFAT	0.881246	0.0101495		KDM3A	0.319983	0.353081
MYBL2	0.881024	0.00428447		PBXIP1	0.318438	0.0268724
KAT2B	0.880722	0.0434864		ZBTB20	0.318264	0.0987492
SAP30	0.878517	0.0192678		CDX2	0.317342	0.0344066
KDM5A	0.877095	0.00257328		CGGBP1	0.31723	0.0350112
CTBP2	0.874003	0.000282817		POLR3F	0.316646	0.586422
CXXC1	0.872933	1.84875e-05		PINX1	0.315699	0.211431
UBN1	0.872514	0.000186485		ZNF564	0.315004	0.137801
SMG8	0.871982	0.000304069		CCNC	0.313514	0.2973
NUMA1	0.871099	4.13572e-05		SMARCAD1	0.308257	0.649796
RYBP	0.870881	0.000141239		KLF12	0.304623	0.265081
RFX3	0.86999	0.159177		HMGB2	0.303253	0.003861
MGST3	0.869004	0.0015672		PHIP	0.302964	0.146106
TICRR	0.867513	0.000143841		SNW1	0.299582	0.0127935
IWS1	0.867285	0.00958941		BRD4	0.296821	0.25297
MED14	0.867216	0.000371774		HDGF	0.290991	0.0493285
NUP88	0.863886	0.000342043		CBX8	0.286628	0.00320236
MED13	0.863434	0.00875817		MBD2	0.279035	0.0766804
CWC25	0.862866	0.000110915		ZNF623	0.274669	0.827389
RRS1	0.862099	1.2976e-06		FGF2	0.27362	0.0283446
PNN	0.86152	1.07297e-05		GATA2	0.268198	0.0693079
BRD2	0.859437	0.00113345		RPTOR	0.267938	0.0555979
DHX33	0.859281	5.76901e-05		ZNF362	0.267119	0.00422459
RBM27	0.857807	0.000162356		TCEA1	0.265357	0.106545
TADA2B	0.857239	0.00525342		POLR2A	0.261675	0.0859627
TERF2	0.8534	9.98309e-05		ZSCAN29	0.260945	0.564689
FEN1	0.853151	0.0130862		THYN1	0.260752	0.0537143
HMGN4	0.852862	0.00119524		TBL1X	0.260419	0.371433
POLL	0.85219	0.00327411		GLI3	0.259519	0.309185
ZNF106	0.852002	0.000720992		TRIM33	0.254043	0.570598
TOR1AIP1	0.848465	5.90842e-05		MED22	0.247173	0.888653
WDR76	0.848177	2.20171e-07		PPHLN1	0.246491	0.0243486
ACTL6A	0.845126	0.000134274		PHF21A	0.246167	0.0341071
FLYWCH1	0.844373	5.64522e-05		TCF20	0.245985	0.284975
HP1BP3	0.843958	0.000114224		PURB	0.240928	0.000609353
EFTUD2	0.843393	2.30436e-05		PSPC1	0.238611	0.00206963
KIF23	0.842807	8.59979e-06		ACTR8	0.233526	0.00449654
IK	0.842314	0.000545243		SAP18	0.233047	0.0745097
ZNF668	0.84149	0.000146144		CBX4	0.225607	0.0162489
GATAD2A	0.840872	0.002772		JMJD1C	0.221182	0.191318
TFAP2A	0.839924	0.000281929		H1-4	0.216726	0.109329
PAF1	0.83775	0.000556312		RING1	0.212543	0.0392546
TAF1C	0.837079	0.037057		ARID4A	0.21056	0.692937
ZNF652	0.835001	0.000341845		SFPQ	0.206814	0.00221449
ZFP37	0.833736	0.00266776		AGO2	0.2061	0.320142
TFAP2C	0.833083	0.000235582		DDX5	0.205881	0.000419241
TAF6L	0.832518	0.000392668		CCNH	0.202575	0.0317861
KIAA1328	0.832034	0.0321738		PHF5A	0.200454	0.141984
CHTOP	0.831814	2.61484e-06		CHAF1B	0.199286	0.0068794
TSPYL1	0.831529	0.0121992		INO80D	0.197756	0.117697
SPIN1	0.829321	0.00333257		ARID1B	0.195638	0.530156
PML	0.828661	0.000370266		HMGA2	0.194605	0.290099
SAFB2	0.828497	1.06559e-05		ITCH	0.192703	0.0325583
ZBTB24	0.828407	0.000144365		BRIP1	0.187744	0.111062
BRMS1L	0.82822	0.577572		DLX3	0.180007	0.816055
ZHX2	0.82749	0.000547821		ZNF787	0.179775	0.118095
NR2F6	0.824426	0.23076		TCF7L2	0.179401	0.141369
CDK8	0.824234	0.0407068		HMGB3	0.17929	0.0406883
CTNNBL1	0.824032	0.00132751		DLX1	0.178182	0.700149
RBM5	0.820792	4.01876e-05		ACTR6	0.172719	0.740489
TMEM201	0.81855	0.00767607		YEATS4	0.167624	0.686922
INTS1	0.818423	0.0185017		RUVBL2	0.161193	0.0823783
C15orf61	0.81798	0.136825		PSIP1	0.159006	0.14106
PRPF19	0.816545	0.000182958		MLLT1	0.156761	0.69252
XRCC5	0.815026	8.60291e-06		TOP1MT	0.154939	0.342476
ICE2	0.814829	0.00177709		ICE1	0.152273	0.346193
RNF169	0.814407	0.000638026		SIRT7	0.148349	0.295439
CDCA5	0.814067	0.00108873		CBX3	0.146094	0.620536
HPSE	0.813607	0.537019		RUNX2	0.145278	0.584287
EZH2	0.813549	0.00132535		MED8	0.143865	0.187187
BOD1L1	0.812116	0.000694007		CASP8AP2	0.14057	0.27108
KANSL1	0.81081	0.00303832		TAF15	0.140355	0.128245
XRN2	0.808974	0.000159941		HDAC1	0.13645	0.073004
TBP	0.808386	0.00305171		MUC1	0.134497	0.753977
TEAD1	0.806878	0.00465806		ELL	0.130262	0.594012
XAB2	0.806734	0.000228585		ZBTB1	0.126309	0.60385
KRR1	0.805951	0.00101411		WDR5	0.124629	0.312898
CUL1	0.80369	6.74014e-05		HOXC9	0.124516	0.299322
CHTF18	0.803502	0.00127394		CBFB	0.123817	0.591889
MSL1	0.802045	0.00176726		INO80	0.11885	0.0381997
MUS81	0.801547	4.66121e-05		ASF1A	0.108032	0.783693
RPL22	0.800064	0.00154468		PURA	0.0948395	0.583543
INTS9	0.798951	0.000688333		SQSTM1	0.0944524	0.239281
ZNF335	0.798553	0.00268694		C1QBP	0.0905501	0.743675
ZXDC	0.797089	0.0252196		PCGF1	0.0803113	0.363904
DDX46	0.796775	0.000369599		CTBP1	0.0759743	0.215797
ZNF628	0.796518	0.107356		NELFCD	0.0687926	0.261257
ZSWIM9	0.796176	0.0927453		EP300	0.0674316	0.62245
C8orf33	0.796129	0.00551447		SUPT6H	0.0553016	0.843551
U2AF2	0.796074	0.00222449		UBTF	0.0550822	0.242852
DOT1L	0.795348	0.00234456		BMI1	0.048611	0.90462
NLE1	0.795066	0.00417107		INO80B	0.0480118	0.777182
MRGBP	0.794663	0.0111006		KDM2B	0.0419951	0.382995
RPL18A	0.79433	0.000113156		SP2	0.0397239	0.564011
DIDO1	0.794068	0.000689171		RBM39	0.0394276	0.754081
PWP1	0.791088	0.0161772		ACTN4	0.039015	0.332951
RAE1	0.790429	0.000243804		GTF2F1	0.0389366	0.881286
ZNF317	0.789866	0.00101019		MSL3	0.0372133	0.838207
BARD1	0.789259	0.00913467		MTA3	0.0370942	0.812002
SAP130	0.789055	0.000421635		NONO	0.0328586	0.496122
SP140L	0.789053	0.00910364		SKIL	0.0324343	0.756289
PRKDC	0.787983	1.06626e-06		NELFA	0.0324233	0.911724
ZNF512B	0.787307	0.000457425		NFKB2	0.0315216	0.896094
SMC1A	0.786915	0.00201968		DHX9	0.0313948	0.127361
DTL	0.786557	0.0326226		ZIC2	0.0206117	0.919478
SIN3B	0.785419	7.01823e-05		KMT2C	0.0187775	0.893508
POLR1B	0.785314	0.000183827		DRAP1	0.0148742	0.954634
CENPH	0.785153	0.102612		FUS	0.00524489	0.952176
MYPN	0.784536	0.0018137		HMG20A	-0.00472674	0.982264
ZNF627	0.782494	0.00812865		ANP32E	-0.00529651	0.97552
HIC2	0.782088	0.135967		RUNX1	-0.0112402	0.714183
KAT5	0.78205	0.0318752		NKX2-5	-0.012711	0.959363
NCBP3	0.778473	2.6802e-05		BCOR	-0.0153569	0.78483
GATAD1	0.777156	0.0178757		SMAD2	-0.0177528	0.920098
JDP2	0.774846	0.000763314		WDR77	-0.0178346	0.957603
URB1	0.773981	0.000234492		ZNF768	-0.0208694	0.746122
YAF2	0.773776	0.00183687		ACTR5	-0.0233687	0.588317
ZNF516	0.77269	0.00288952		HOXC10	-0.0260587	0.932949
SPTY2D1	0.772206	1.08755e-05		HMG20B	-0.0267582	0.88765
BRD1	0.772004	0.00103922		PQBP1	-0.027624	0.931012
PIK3C2A	0.771025	0.00386983		COPS2	-0.0407837	0.711837
XRCC6	0.770838	6.46721e-06		PHF1	-0.0463636	0.891551
SFSWAP	0.770712	0.000305011		ZKSCAN4	-0.0475085	0.926131
DHX38	0.770599	0.000372494		RPRD1B	-0.0480756	0.824439
MGMT	0.769528	0.000288629		HTATIP2	-0.0559441	0.765978
INTS13	0.769162	0.000247828		RREB1	-0.0581549	0.0551367
PRDM15	0.768065	0.00012513		CAVIN1	-0.0581831	0.865992
KPNB1	0.76713	2.52848e-05		ZNF16	-0.0621147	0.703054
PSMC3IP	0.766634	0.610966		SAP30BP	-0.0629455	0.741739
CD70	0.766538	0.0223007		FHL2	-0.0644009	0.85756
LRRC41	0.764415	0.00750078		EDF1	-0.0690447	0.803565
NOL8	0.763456	0.000715431		OTX1	-0.0712593	0.804467
KDM1A	0.763363	0.00887578		HMGB1	-0.0752505	0.167453
TRIM28	0.762519	0.000228831		HLTF	-0.0773957	0.0228533
VRK1	0.761846	0.00345097		LDB1	-0.0800698	0.659289
KLF16	0.760424	0.00145053		MED18	-0.0872101	0.807714
MAD2L1	0.760009	0.130326		CC2D1A	-0.087971	0.772733
USP1	0.759954	0.00365183		PAWR	-0.0895927	0.830768
ZNF692	0.75978	0.0124819		TRIP13	-0.0968393	0.628734
BAZ2B	0.756728	0.0010123		YBX1	-0.0972157	0.306123
RRP36	0.755209	0.0472475		MCRS1	-0.111605	0.601399
ATRIP	0.754448	0.0366149		ZNF384	-0.11196	0.329328
ZMYND8	0.752956	0.000429728		TPR	-0.113286	0.0321621
PRPF40A	0.752442	0.00127094		BTAF1	-0.117729	0.0953996
MYNN	0.751569	0.00121664		ZSCAN22	-0.121865	0.838522
TCOF1	0.751027	0.00150713		TDP2	-0.125845	0.776562
DMAP1	0.748799	0.00293771		NDUFA13	-0.12916	0.062384
ZNF146	0.748041	0.000258463		HNRNPK	-0.129698	0.0036669
EHMT1	0.746088	9.77051e-06		RUNX3	-0.131368	0.0433522
XPOT	0.745565	0.000288042		NCL	-0.131751	0.164531
MORF4L1	0.744868	0.000127372		ELP1	-0.138801	0.397358
BHLHE40	0.743127	0.00743487		BANP	-0.14144	0.110125
SMARCB1	0.742092	0.0011113		SMAD1	-0.154132	0.674252
NSUN2	0.741026	6.17431e-05		SLTM	-0.156225	0.00298355
CGAS	0.740666	0.0328821		ZNF276	-0.170062	0.0588599
IRF2BPL	0.740515	0.0256531		STAT1	-0.186025	0.0814034
NUP50	0.740341	0.000419886		MBD4	-0.189262	0.267999
FIP1L1	0.739099	0.000921558		HOXC5	-0.19166	0.555813
PRPF4	0.738571	4.15205e-05		NFRKB	-0.2107	0.100402
ERH	0.73855	4.87041e-05		ZBTB44	-0.221549	0.567769
TFAP2B	0.73742	0.452648		GTF2H2	-0.230571	0.122973
WDR33	0.735577	0.0073578		YAP1	-0.239827	0.264088
ZNF24	0.734551	0.00251332		AGO1	-0.245203	0.025662
SF1	0.73417	0.000462447		NELFB	-0.24901	0.0373422
NOP16	0.733595	7.1747e-06		PHF2	-0.255084	0.0154092
NSA2	0.732342	0.00103825		SNX6	-0.267076	0.851033
ERCC3	0.731381	0.00129151		ZNF48	-0.268142	0.00737053
RAD18	0.730546	0.0111499		CHEK1	-0.269982	0.867338
CENPI	0.730514	0.201584		MTDH	-0.27361	0.0301986
BICRA	0.728186	0.191097		EWSR1	-0.278898	0.122842
KPNA2	0.72648	0.000665391		MTF2	-0.287378	0.0104201
ZSCAN25	0.724496	0.000726936		MAD2L2	-0.294473	0.584154
MED11	0.724384	0.0360099		RAF1	-0.30161	0.46476
SP3	0.724116	0.0183067		JARID2	-0.303312	0.132735
NKRF	0.722369	0.000143962		SCAI	-0.314042	0.268172
SLC1A3	0.722082	0.243932		HMGXB3	-0.329826	0.728212
KDM4B	0.720651	0.0459718		CASZ1	-0.339208	0.0324777
DYNLT1	0.720486	0.162007		NPM3	-0.345566	0.421586
HCFC2	0.720319	7.71692e-05		TFB1M	-0.363579	0.384741
DEK	0.719066	9.5921e-06		EZR	-0.368326	0.00174176
DDX47	0.718743	0.000331379		KMT5A	-0.376032	0.0174753
RBPJ	0.718012	0.00303985		DPY30	-0.380576	0.312421
ZBTB9	0.71697	5.36338e-06		YY2	-0.420218	0.768365
MED4	0.716938	0.00192873		CSDE1	-0.433915	0.000502807
MED6	0.716913	0.017692		INO80E	-0.435036	0.412714
WDR55	0.716236	0.0283942		CASK	-0.436789	0.0520173
DHX40	0.713772	0.0156405		UFL1	-0.438176	0.0819999
MED19	0.713754	0.257001		ZNF350	-0.439761	0.0923779
BRPF3	0.713649	0.0858213		ZNF639	-0.44822	0.022035
SUPT3H	0.713535	0.165241		THAP1	-0.451975	0.0895049
IMP4	0.712797	0.000399996		MYO6	-0.458393	0.0126473
ATF4	0.712415	0.0141069		POLR3C	-0.489937	0.0311164
SINHCAF	0.710992	0.00133973		REL	-0.503265	0.0409273
DNAJC17	0.705064	0.312868		ZNF691	-0.503583	0.0280598
FLYWCH2	0.701664	0.0444507		ZMYND11	-0.509175	6.52215e-05
RFC3	0.700606	0.00045766		PDCD4	-0.519306	0.0066494
STK10	0.699824	0.000131169		SNAPC2	-0.538079	0.455613
AFF4	0.698598	0.00581219		PA2G4	-0.558526	0.00512273
RECQL5	0.698278	0.000108977		MED28	-0.56359	0.0658166
ZNF174	0.696869	0.00789293		MED7	-0.578623	0.209066
YY1	0.696698	2.19044e-05		INO80C	-0.600557	0.0556269
FNBP4	0.69561	0.0264552		LRRFIP1	-0.636681	0.0177994
ZNF219	0.694833	7.29495e-05		ANP32A	-0.648602	0.0208631
DNAAF5	0.694333	0.0083882		FLII	-0.669545	0.00329558
MIER1	0.693248	0.00175713		ZNF280D	-0.674304	0.0700608
PARP1	0.692887	4.70002e-06		GSK3B	-0.67565	0.135812
ANKZF1	0.692114	0.00536338		BAZ1A	-0.694854	5.6727e-05
DUS3L	0.692089	0.0173852		ELOB	-0.711444	0.00794792
SUZ12	0.690878	0.000413119		ELP3	-0.714338	0.010143
TOP1	0.690491	0.000831962		HSPA8	-0.715062	3.07899e-05
ZNF184	0.690476	0.00356728		BTF3	-0.724099	0.0242116
NFKBIL1	0.68909	0.139422		PRMT5	-0.726694	2.79608e-05
KLF4	0.689067	0.00119317		ZNF444	-0.734896	0.0807985
GAPDHS	0.689005	0.366268		HNRNPU	-0.738343	6.05112e-05
ATM	0.687481	0.000165791		RALY	-0.740073	0.000721055
NUFIP1	0.686945	0.089035		PICALM	-0.741107	0.00611161
CDK11B	0.686572	0.00436158		HNRNPC	-0.745461	0.00255074
ZNF664	0.686269	8.91153e-05		ZNF326	-0.760108	0.000274493
PLCB3	0.685712	0.000941052		FLNA	-0.781854	0.000167241
ASXL2	0.685627	0.00378929		CNOT1	-0.784251	0.024937
PIMREG	0.685515	0.018249		MIDEAS	-0.790405	7.49609e-05
UTP11	0.683792	0.00204235		MED9	-0.795295	0.0478488
CMSS1	0.682953	0.00455797		PRMT1	-0.802986	0.012512
IPO5	0.681916	0.00164727		AURKAIP1	-0.809796	0.587638
SARNP	0.678565	3.16161e-05		GPS2	-0.810501	0.358952
FYTTD1	0.677954	0.000253691		TRIM27	-0.8183	0.0807619
RACGAP1	0.67655	0.000779934		ARRB2	-0.826168	0.00087147
NCOR1	0.676141	0.0699704		EGFR	-0.849597	0.0335679
GTF2H1	0.676077	0.0333367		H1-2	-0.855258	0.00574965
PIN4	0.675379	0.0318098		ZNF460	-0.866612	0.524843
DDX39B	0.674341	0.000105952		KDM5C	-0.869172	0.138138
ZNF865	0.671553	0.130337		SSBP3	-0.887922	0.0934444
BPTF	0.67112	7.07151e-05		HAT1	-0.892355	0.321825
ZNF592	0.670495	0.000526002		PPID	-0.904615	0.00400653
SNAPC4	0.670456	0.00307767		HELZ2	-0.921224	0.0301476
ZNF687	0.669077	0.000330307		HNRNPD	-0.928888	3.51996e-06
PCNA	0.666657	0.0156706		SRSF2	-0.937351	0.101593
H1-10	0.666375	0.00340193		ALYREF	-0.970466	0.000116283
PAPOLA	0.665703	0.0281437		ELOC	-1.01003	0.00604401
RNPS1	0.665552	0.211		CHCHD3	-1.04277	0.0468038
CWF19L2	0.665164	0.0110127		NIBAN2	-1.06801	0.000143022
VPS72	0.66451	0.000496904		PPIE	-1.07307	0.0452246
MRTFB	0.662951	0.0330409		CTNND1	-1.10097	3.5531e-06
ZNF771	0.662479	0.00430827		ILF2	-1.1077	3.3545e-07
HEATR3	0.662377	0.0148338		MYOD1	-1.11002	0.000356696
RNPC3	0.661189	0.192571		LTF	-1.12352	5.61281e-07
SFMBT2	0.658625	0.00133307		TRIP4	-1.17177	0.422648
SART1	0.658063	7.82199e-05		MEAF6	-1.17361	0.457598
DDX50	0.657727	0.00295758		TMF1	-1.21748	0.068771
POLR2G	0.656447	0.191728		LRRFIP2	-1.2453	0.00438365
HASPIN	0.655172	2.70541e-06		STAT3	-1.25475	0.0038755
TRIR	0.653987	0.00614979		STRAP	-1.29311	5.57365e-06
SF3B2	0.653096	5.17492e-05		RELA	-1.29593	0.00123688
PHF3	0.652527	0.000614056		CHD7	-1.2966	1.01619e-05
ZNF274	0.651597	0.0861579		YBX3	-1.32518	9.83741e-07
IFI16	0.651162	8.13604e-05		PBX3	-1.33236	0.578157
DDX17	0.650897	9.35579e-06		ANP32B	-1.33866	0.000254661
PRR14	0.649727	0.0419433		STAT6	-1.34111	0.000123143
RFC2	0.64814	8.55688e-05		TRIM25	-1.37752	0.0042996
LEMD3	0.647221	0.0369771		TRIP6	-1.39618	0.0125644
NUP43	0.645745	0.000165883		JUP	-1.40964	4.12153e-06
LEMD2	0.645281	0.00130524		CNOT9	-1.48427	0.0557642
HEATR1	0.645222	7.8054e-05		PCBD1	-1.51192	0.000131985
MORC2	0.64333	0.00708865		CNOT2	-1.51961	0.0548253
CDK9	0.643261	0.00347521		PARK7	-1.52929	0.00256294
KAT8	0.642589	0.0216605		ELANE	-1.55	0.0114948
ZNF354A	0.64251	0.0210542		CSNK2A2	-1.55537	0.000824443
UTP23	0.641641	0.0175439		ACTB	-1.6656	9.25401e-07
FIZ1	0.641316	0.0205925		PDLIM1	-1.68179	0.00495336
INTS3	0.640735	3.49331e-05		COPS5	-1.7269	0.00612425
CENPF	0.638275	0.339661		RBMX	-1.77821	4.46597e-07
NUP188	0.637978	0.00207585		CTNNB1	-1.821	0.000260771
NFAT5	0.637849	0.000979838		NME2	-1.8266	2.98816e-07
RFX5	0.635597	0.00469942		TLE3	-1.83188	0.00126395
CSTF3	0.635019	0.000499297		SUB1	-1.83429	8.995e-06
CENPV	0.635007	6.94892e-05		ASCC3	-1.8536	0.000198017
SS18	0.633413	0.054533		RHOA	-1.91097	4.59763e-05
NSD1	0.633197	0.00587072		RBM14	-1.92338	3.29299e-08
GATA6	0.630903	0.177784		EGLN1	-1.92837	0.0700374
TADA3	0.630357	0.099729		NUDT5	-1.94929	0.000197134
MED12	0.628703	0.00100526		DNAJB1	-1.9748	3.28841e-06
LRIF1	0.62728	0.000289177		ASCC1	-2.00506	0.248812
ZNF532	0.623946	0.0128254		WBP2	-2.017	0.00659956
CDC73	0.623586	8.35922e-06		CLU	-2.04713	0.000863352
SNRNP48	0.623024	0.0497297		TXN	-2.13745	1.16601e-06
BAZ2A	0.622984	0.000104409		ZBTB2	-2.15385	3.04185e-06
EMG1	0.622726	0.000416899		CDK5RAP3	-2.21726	8.92638e-05
DDX39A	0.622693	0.00120901		TSG101	-2.27282	0.013582
SETD1A	0.621896	0.0411041		PREB	-2.28857	0.00519215
ZFP64	0.620795	0.00103023		TRIM16	-2.35353	5.54129e-05
SRFBP1	0.617877	0.0553045		S100A8	-2.35364	1.82573e-05
INTS7	0.61591	0.00517894		CIC	-2.4101	0.125334
TRERF1	0.615392	0.00703944		IKBKG	-2.5238	0.000602083
PPIL2	0.614844	0.0425777		ENO1	-2.5247	2.71435e-06
BCLAF1	0.614325	0.000134657		AIP	-2.53023	0.00208383
CENPT	0.61416	0.0217925		PIN1	-2.56317	0.00380813
DDX55	0.611229	0.000513799		PRNP	-2.5817	0.064704
CHD8	0.609709	0.0138784		ZSCAN26	-2.7265	0.000789916
HMGXB4	0.607541	0.0149684		GRHPR	-2.82173	0.000102534
MED16	0.606883	0.0171081		CDK5	-2.84019	0.00569418
HTATSF1	0.606637	0.00471467		CHCHD2	-2.94501	0.388553
FUBP1	0.604728	0.000878169		PRDX5	-2.96857	0.000184204
DDX52	0.603169	0.000445212		TRIM11	-2.97274	0.00669924
HMGN1	0.602319	0.00909819		MYCBP2	-3.03974	0.0388636
CPSF6	0.601137	4.45379e-05		MYCBP	-3.04156	8.34683e-05
SGF29	0.600842	0.0379176		CALR	-3.07505	1.9175e-05
RSL24D1	0.600118	0.466141		S100A9	-3.15463	4.22878e-07
VEZF1	0.598859	0.00617535		IRF6	-3.21333	0.00139771
EZH1	0.597758	0.0130233		ANXA4	-3.22069	1.54385e-06
TP53BP1	0.597744	0.00326579		LANCL2	-3.24282	0.00420456
RRN3	0.596901	0.00327568		YWHAB	-3.27167	6.9864e-09
NCOA6	0.594023	0.038408		HMOX1	-3.34213	3.2325e-06
KMT5B	0.593728	0.00207623		CARHSP1	-3.35849	1.61917e-06
ATRX	0.592569	0.0347711		PFDN5	-3.38634	0.00197851
CDK13	0.591071	0.00986704		CRK	-3.49988	0.0015341
TOPBP1	0.590604	0.0563228		TRIP11	-3.56576	0.0123526
RBBP7	0.590061	4.77522e-05		MALT1	-3.66978	3.81959e-05
SMCHD1	0.589779	0.0104762		PEX14	-3.79579	0.121101
PCF11	0.587972	0.00583283		SDR16C5	-3.81707	3.19061e-06
DAXX	0.587891	0.00445766		IRF3	-3.9579	0.149205
SCMH1	0.585846	0.0197595		SYK	-4.20341	0.000878183
EXOSC10	0.585835	4.02015e-05		ARRB1	-4.2719	1.98638e-06
NUP62	0.585604	0.0315864		NIF3L1	-4.33856	7.63482e-05
ERBIN	0.585387	0.228379		PLK3	-4.61561	0.000163082
HIRA	0.585056	0.000162508		NR1H3	-4.8107	0.034872
UBR5	0.583675	0.079922		HCLS1	-4.85389	1.43854e-05
CHAF1A	0.583628	0.00188037		GRHL1	-4.87743	0.00022631
CDK12	0.583381	0.101786		TRADD	-4.90994	3.47833e-06
POLR3B	0.582563	0.00031402		ARHGEF5	-5.01246	0.000488041
ZNF45	0.582032	0.334929		MTPN	-5.14628	0.000596643
SKI	0.58094	0.000688419		TRIM29	-5.31265	3.02843e-06
THAP11	0.579312	0.00940814		SIRT2	-5.32717	0.0050682
AKAP17A	0.578872	0.00527356		CALCOCO1	-5.36578	0.000692617
BUD31	0.577552	0.000660364		NCK1	-5.56005	2.76661e-07
RBM22	0.576129	0.0112254		HINT1	-6.14516	0.0311262
TASOR2	0.576116	0.00108589		MNDA	-6.65085	0.00145896
PUF60	0.573595	3.14624e-05		PAK6	-6.68039	8.83097e-05
CPSF7	0.573406	0.00380093		CTNNBIP1	-7.63784	0.00053978
SMARCAL1	0.573101	0.00910852		PYCARD	-7.8914	1.87362e-07
POLR2H	0.571329	0.000434688
JADE2	0.570899	0.0278376
PLRG1	0.569777	0.00330815
TSR1	0.569133	0.00286639
SF3A1	0.567655	0.00021395
NIFK	0.567543	0.000675153
SF3B3	0.566882	8.15969e-05
KMT2B	0.565622	7.15448e-05
LIG3	0.56121	0.000130675
HMGA1	0.560515	0.0906719
WDR46	0.560158	0.00277489
RFC4	0.560021	0.000106679
ZNF653	0.558932	0.0203166
C19orf53	0.558336	0.000991519
FCF1	0.556492	0.0133283
CWC22	0.555806	0.000468638
NOL4L	0.55409	0.202973
H1-5	0.552577	0.0111977
KHDC4	0.55249	0.190219
NELFE	0.551998	0.716631
FOXL2	0.550639	0.000366124
ZNF800	0.550203	0.000669812
CC2D1B	0.549632	0.0123237
DCAF1	0.546872	0.0255858
RAD23A	0.546818	0.0772615
NUP54	0.545723	0.0354588
MEN1	0.541463	0.000275995
CSTF1	0.540753	0.00118377
PARP2	0.540743	0.000382871
RECQL4	0.53942	0.061933
MRTO4	0.538644	0.00478955
E2F3	0.538204	0.00335399
UBP1	0.536222	0.0141149
PITX1	0.535614	0.17422
MECP2	0.535347	0.000222233
IRF2BP2	0.535198	0.0333451
AURKB	0.534537	6.39014e-05
ZNF581	0.534402	0.430702
FAM32A	0.533952	0.00102812
ERCC4	0.53306	0.00822893
SNIP1	0.531325	0.513478
DROSHA	0.531258	0.017353
RAD23B	0.531007	0.00543387
NAA40	0.530711	0.0672828
CPS1	0.529159	0.00588975
NOL6	0.529127	0.000248573
DHX15	0.528772	1.12469e-05
POLR3D	0.528407	0.0478195
RANBP2	0.526325	0.000845443
BTBD16	0.525989	0.00557022
DKC1	0.52558	5.52007e-05
C1orf35	0.524644	0.00204443
XRCC1	0.522909	0.000100846
BLM	0.519905	0.0011295
ARGLU1	0.518013	0.0016958
RBBP4	0.517723	0.000129427
BCORL1	0.516667	0.000538769
GTF2B	0.516588	0.117307
RFC5	0.515965	0.000409874
COPS7A	0.513341	0.0510906
USP22	0.510689	0.439922
KIF22	0.510594	4.17609e-05
PUS7	0.510228	0.00596668
POLR3E	0.510157	0.000480653
SUGP1	0.508761	0.0022462
SF3B1	0.508545	4.74593e-05
BRD3	0.508449	0.144288
MMS19	0.504365	0.01604
NUSAP1	0.504325	0.000577722
PPIG	0.503698	0.000936929
ELAC2	0.5032	0.00312513
SNRNP70	0.502991	0.00868974
MED27	0.50128	0.055091
GLE1	0.500322	0.00461724
GEMIN2	0.499854	0.251375
C1orf174	0.498316	0.000605577
CTDSPL2	0.49783	0.0194019
ETV3	0.497643	0.154525
GTF3C5	0.495695	0.0032569
RBM12	0.495675	0.112591
PHAX	0.495073	0.489542
KPNA4	0.493922	0.000804954
TOP3B	0.493194	0.326298
KAT7	0.493126	0.000870369
SLC4A2	0.492136	0.126732
FAAP24	0.491141	0.0284246
ZGPAT	0.489816	0.0192238
DIMT1	0.489351	9.85199e-05
SUPT5H	0.486611	0.000213641
U2AF1	0.48643	0.00953883
BUD13	0.484818	0.00124119
FOSB	0.482813	0.0949191
CCDC59	0.482334	0.0141234
H1-1	0.482299	0.00640249
ZNF593	0.480919	0.0119993
WAC	0.477622	0.00813258
ZFC3H1	0.477554	0.0121477
TRRAP	0.477329	0.00378923
ZC3H4	0.476037	0.0604819
IGHMBP2	0.473376	0.0165923
GTF2H3	0.472988	0.0570063
C16orf87	0.471297	0.0377783
ZNF462	0.470874	0.0251835
FAM50A	0.469395	0.203411
UHRF2	0.467736	0.0355796
TAF5L	0.467736	0.00411755
FAF1	0.465662	0.00391936
ZBED4	0.464022	0.00123465
ATXN1	0.462993	0.00352742
FAM120C	0.462108	0.348758
RCOR1	0.459542	0.00226783
CENPB	0.459445	0.0061462
NIP7	0.45797	0.0432421
TOP2B	0.456439	0.000234854
SPEN	0.455886	0.00587229
NR0B2	0.455341	0.370633
ZNF574	0.454803	0.0369589
DDX1	0.454632	6.35705e-06
PCNP	0.454192	0.195022
PCID2	0.454162	0.0201232
CBX5	0.449998	0.0448285
FOXF2	0.449334	0.515886
AHCTF1	0.447105	3.40045e-06
GTF3C1	0.44643	0.000863674
CHD2	0.44543	3.02844e-05
NDC80	0.444506	0.770454
KPNA1	0.444404	0.266386
BUB3	0.444093	0.00885981
KDM4D	0.439434	0.0479445
CHD1	0.436096	0.235186
FAM50B	0.435897	0.290743
OGG1	0.433784	0.0243954
ASH2L	0.432444	0.000244457
SLF1	0.431158	0.00897031
RPL22L1	0.431079	0.0913832
RBM33	0.429806	0.0211415
GPKOW	0.428369	0.0412282
CDYL	0.428128	0.005852
HMCES	0.427708	0.00433993
TOP2A	0.424513	0.000866552
SLC4A1AP	0.422946	0.383025
MKI67	0.422565	6.58144e-06
ISG20L2	0.421776	0.00109562
SF3B4	0.42156	0.0404294
ELOA	0.42135	0.0286913
PRPF31	0.421142	0.00862273
WDR74	0.420412	0.0141137
RAN	0.420311	0.0218738
APEX1	0.418806	0.0100013
TASOR	0.416707	0.0107644
SURF2	0.415345	0.360166
PIAS2	0.414932	0.119508
PPM1D	0.412825	0.042964
PRDM1	0.412128	0.0197252
OGFR	0.412076	0.017484
MORF4L2	0.40982	0.112523
ZNF205	0.409819	0.0702341
HOMEZ	0.409478	0.0582298
NMNAT1	0.408779	0.708006
ZNF3	0.408103	0.383609
RBBP5	0.406693	8.9028e-05
RNF2	0.405855	0.0406977
RBM15B	0.404731	0.00565287
CSE1L	0.402374	0.00948277
MBTD1	0.401463	0.591933
FBXL18	0.401309	0.765482
PPP1R8	0.400839	0.00836316
NIPBL	0.400541	0.0319288
RAI1	0.400151	8.87762e-05
CHD4	0.395682	0.00155193
TRIM41	0.394898	0.0219774
NPM1	0.394339	0.0127971
RAD50	0.389837	0.00936365
SRCAP	0.388092	0.0419968
THOC6	0.385025	0.0191572
RRP7A	0.382294	0.0338577
RCOR3	0.380157	0.0099054
CXXC5	0.379878	0.0150694
CDCA8	0.376714	0.000489335
TERF2IP	0.376434	0.00409885
TWIST2	0.375419	0.0269045
ZNF483	0.374282	0.113055
EED	0.37374	0.000254938
ERCC2	0.372882	0.000157676
NOLC1	0.371263	0.0172618
LCOR	0.368955	0.0191038
POLD2	0.368385	0.407102
TBL1XR1	0.367702	0.00526446
RPA1	0.366531	0.00517768
STK35	0.365901	0.293461
GAR1	0.364619	2.91259e-05
SCAF11	0.36302	0.00179407
ZNF638	0.361247	0.000486832
MAZ	0.361165	0.0146218
CLK3	0.361042	0.168179
MED10	0.359706	0.132407
SSBP4	0.359683	0.361376
POLR1E	0.358155	0.0487153
CDK2	0.356665	0.129489
POLR1F	0.35204	0.183743
HDAC2	0.351295	0.00059421
DPF2	0.350144	0.0539229
MDC1	0.350095	0.00503374
ARHGAP10	0.348766	0.142791
CDK7	0.348204	0.375672
DGKZ	0.345175	0.387526
ARID1A	0.342676	0.124059
SUMO1	0.340594	0.650133
NUP37	0.339786	0.065007
GTF2H4	0.339435	0.052605
POLR1G	0.337212	0.0278519
ALKBH2	0.336966	0.562895
KMT2A	0.335109	9.90259e-05
CHD9	0.332665	0.111595
TIGD2	0.328953	0.0437516
NOP10	0.328787	0.00184071
DHX36	0.328042	0.0007087
NXF1	0.327244	0.00728779
KHDRBS1	0.327081	0.0244112
MNAT1	0.322855	0.271544
CLK1	0.321803	0.421632
KDM3A	0.319983	0.353081
PBXIP1	0.318438	0.0268724
GLYR1	0.318353	0.0024882
ZBTB20	0.318264	0.0987492
RPA2	0.317508	0.00197017
CDX2	0.317342	0.0344066
CGGBP1	0.31723	0.0350112
POLR3F	0.316646	0.586422
PINX1	0.315699	0.211431
SNRPA	0.313693	0.201611
CCNC	0.313514	0.2973
PHC2	0.312575	0.0107287
CCDC77	0.312355	0.299565
CPSF4	0.30998	0.0905506
DUSP11	0.309457	0.00246774
SCAF8	0.308886	0.292928
SPAST	0.308762	0.289272
SMARCAD1	0.308257	0.649796
KLF12	0.304623	0.265081
UPF3A	0.304215	0.499255
HMGB2	0.303253	0.003861
PHIP	0.302964	0.146106
HNRNPLL	0.302297	0.000573096
RBMX2	0.301267	0.216677
SNW1	0.299582	0.0127935
NABP2	0.297984	0.397247
BRD4	0.296821	0.25297
JRKL	0.295568	0.456063
HDGF	0.290991	0.0493285
CBX8	0.286628	0.00320236
LMNA	0.285952	0.00114963
PNO1	0.2859	0.161027
UBE4A	0.284229	0.28903
C17orf49	0.280794	0.0129909
USP3	0.280352	0.0327262
MBD2	0.279035	0.0766804
ZNF623	0.274669	0.827389
FGF2	0.27362	0.0283446
FBXO11	0.271711	0.0197986
ORC4	0.270027	0.171696
GATA2	0.268198	0.0693079
AUP1	0.267591	0.483297
SLC25A12	0.26742	0.0438769
ZNF362	0.267119	0.00422459
TCEA1	0.265357	0.106545
EMD	0.265124	0.0203309
SETMAR	0.263061	0.339124
POLR2A	0.261675	0.0859627
SF3A3	0.261487	0.00120583
YTHDC1	0.260971	0.343564
ZSCAN29	0.260945	0.564689
THYN1	0.260752	0.0537143
TBL1X	0.260419	0.371433
POLR3A	0.259645	0.0103888
GLI3	0.259519	0.309185
USP39	0.256559	0.0895995
PPWD1	0.250001	0.183703
MED22	0.247173	0.888653
PPHLN1	0.246491	0.0243486
PHF21A	0.246167	0.0341071
TCF20	0.245985	0.284975
BANF1	0.245741	0.0305912
PURB	0.240928	0.000609353
THOC3	0.239576	0.0266749
QKI	0.239536	0.420256
H1-0	0.238816	0.144524
PSPC1	0.238611	0.00206963
ZNF346	0.235898	0.0556009
SART3	0.234662	0.504221
SLF2	0.233768	0.216458
ACTR8	0.233526	0.00449654
SAP18	0.233047	0.0745097
CBX4	0.225607	0.0162489
SNRPD3	0.22512	0.0514185
VIRMA	0.222378	0.147664
JMJD1C	0.221182	0.191318
UBN2	0.220606	0.207154
H1-4	0.216726	0.109329
RING1	0.212543	0.0392546
ARID4A	0.21056	0.692937
MFSD10	0.209907	0.202609
ERCC6	0.209465	0.0765602
SFPQ	0.206814	0.00221449
DDX5	0.205881	0.000419241
CCNH	0.202575	0.0317861
PHF5A	0.200454	0.141984
CHAF1B	0.199286	0.0068794
SPECC1	0.197184	0.0123375
ARID1B	0.195638	0.530156
HMGA2	0.194605	0.290099
FBL	0.194497	0.103385
ITCH	0.192703	0.0325583
NUP42	0.191815	0.309938
RAD51AP1	0.188525	0.774656
ALG8	0.187995	0.409746
BRIP1	0.187744	0.111062
GTF2F2	0.187101	0.32921
DLX3	0.180007	0.816055
ZNF787	0.179775	0.118095
TCF7L2	0.179401	0.141369
HMGB3	0.17929	0.0406883
DLX1	0.178182	0.700149
ZC3H13	0.17475	0.236229
RBIS	0.174573	0.222013
RTF2	0.171271	0.386413
NMD3	0.16992	0.192804
YEATS4	0.167624	0.686922
PTBP2	0.167163	0.248726
CFAP20	0.16527	0.351192
BCCIP	0.159955	0.584935
PSIP1	0.159006	0.14106
POLR1A	0.15739	0.145937
MLLT1	0.156761	0.69252
PABPN1	0.153499	0.689958
ICE1	0.152273	0.346193
PNKP	0.148967	0.000851834
SIRT7	0.148349	0.295439
CBX3	0.146094	0.620536
RUNX2	0.145278	0.584287
MED8	0.143865	0.187187
CASP8AP2	0.14057	0.27108
TAF15	0.140355	0.128245
HDAC1	0.13645	0.073004
ELL	0.130262	0.594012
RRP9	0.128845	0.341075
ZBTB1	0.126309	0.60385
WDR5	0.124629	0.312898
HOXC9	0.124516	0.299322
PRR3	0.120363	0.536491
INO80	0.11885	0.0381997
DCAF13	0.113322	0.230514
LUC7L3	0.110403	0.517239
ASF1A	0.108032	0.783693
SREK1	0.106802	0.80294
SF3B6	0.106084	0.336169
EIF6	0.10366	0.162881
LRRC40	0.1005	0.661102
ZCCHC9	0.0995009	0.148944
MATR3	0.0981416	0.0428911
MFAP1	0.096238	0.444449
NSUN5	0.0949511	0.130701
MYO1C	0.0885287	0.594655
EXOSC3	0.086756	0.58887
WDR82	0.0804186	0.552917
PCGF1	0.0803113	0.363904
CTBP1	0.0759743	0.215797
H2BC5	0.0713064	0.238163
TBRG1	0.0712052	0.753951
NELFCD	0.0687926	0.261257
POLR1C	0.0679944	0.525857
CPSF1	0.0678967	0.653858
EP300	0.0674316	0.62245
RBM6	0.0629457	0.808125
RBM17	0.062829	0.763196
PPP1CB	0.0609639	0.667923
GPS1	0.0603369	0.703334
ERGIC1	0.0587624	0.584566
HNRNPH1	0.0576953	0.353538
UTP18	0.0562235	0.386168
IPO11	0.0561663	0.834716
DCUN1D5	0.0561377	0.80376
UBTF	0.0550822	0.242852
WASHC5	0.0519297	0.622775
BMI1	0.048611	0.90462
INO80B	0.0480118	0.777182
SNRNP40	0.0465074	0.638257
PRPF8	0.0449403	0.36074
KDM2B	0.0419951	0.382995
SP2	0.0397239	0.564011
SF3A2	0.0395965	0.522385
RBM39	0.0394276	0.754081
GTF2F1	0.0389366	0.881286
MPND	0.0376946	0.888609
MSL3	0.0372133	0.838207
MTA3	0.0370942	0.812002
NONO	0.0328586	0.496122
SKIL	0.0324343	0.756289
NELFA	0.0324233	0.911724
RECQL	0.0318704	0.617029
DHX9	0.0313948	0.127361
TRA2B	0.0250565	0.944285
FAM98B	0.0250537	0.901592
NSL1	0.0208255	0.915734
ZIC2	0.0206117	0.919478
KMT2C	0.0187775	0.893508
PRPF38A	0.0158425	0.924946
ZFR	0.00726294	0.922112
SRRM2	0.00700288	0.86266
FUS	0.00524489	0.952176
TMA16	0.00440222	0.965684
PRIM2	0.00270041	0.992088
DSN1	0.0024039	0.995567
TLK1	0.000130291	0.99964
LRRC47	-0.000350676	0.996478
MAP2K6	-0.00284948	0.996254
HMG20A	-0.00472674	0.982264
ANP32E	-0.00529651	0.97552
POLR2E	-0.00909821	0.936387
U2SURP	-0.00961419	0.895024
HNRNPF	-0.0106986	0.931039
RUNX1	-0.0112402	0.714183
NKX2-5	-0.012711	0.959363
EXOC4	-0.0138137	0.862401
BCOR	-0.0153569	0.78483
TIA1	-0.0181728	0.934227
ZNF768	-0.0208694	0.746122
HNRNPM	-0.0224296	0.359744
PHF6	-0.0245831	0.677815
ING2	-0.0246604	0.983697
HOXC10	-0.0260587	0.932949
HMG20B	-0.0267582	0.88765
SRRM1	-0.0271921	0.839955
PQBP1	-0.027624	0.931012
UNG	-0.0276825	0.949489
NAV2	-0.0280881	0.920373
HMGN2	-0.0281107	0.912472
BUD23	-0.0284525	0.918661
RPS19	-0.0310587	0.435103
TTC21A	-0.0326143	0.931605
ECSIT	-0.0399026	0.972309
SMTN	-0.0427273	0.930624
FUBP3	-0.0437033	0.457251
PHF1	-0.0463636	0.891551
UPF1	-0.0474014	0.224346
ZKSCAN4	-0.0475085	0.926131
RPRD1B	-0.0480756	0.824439
RREB1	-0.0581549	0.0551367
RMI2	-0.0584103	0.557761
PELO	-0.0594315	0.73071
LUC7L	-0.0598821	0.695248
ZNF16	-0.0621147	0.703054
SAP30BP	-0.0629455	0.741739
AQR	-0.0652724	0.494394
SRP14	-0.0655401	0.518882
TARDBP	-0.069303	0.356794
OTX1	-0.0712593	0.804467
HMGB1	-0.0752505	0.167453
BLTP3B	-0.076716	0.84831
HLTF	-0.0773957	0.0228533
CENATAC	-0.0800539	0.809302
LDB1	-0.0800698	0.659289
DCAF7	-0.0809609	0.831167
H3C14	-0.0830845	0.863063
MED18	-0.0872101	0.807714
ISY1	-0.0920034	0.718004
ANKRD17	-0.0964284	0.838562
SKP1	-0.0965106	0.691898
TRIP13	-0.0968393	0.628734
EXOSC2	-0.0968858	0.493969
NOSIP	-0.0977351	0.664792
CBLL1	-0.0990302	0.800277
H3C1	-0.101476	0.711624
RPS6KA4	-0.105973	0.714297
ZRANB2	-0.106219	0.744234
PSMD1	-0.110634	0.24226
DDX19A	-0.111425	0.298201
MCRS1	-0.111605	0.601399
NUFIP2	-0.111639	0.415483
ZNF384	-0.11196	0.329328
SELENOH	-0.112788	0.296927
TPR	-0.113286	0.0321621
DNAJC8	-0.117147	0.824472
BTAF1	-0.117729	0.0953996
WTAP	-0.118868	0.568988
TCEANC2	-0.120812	0.505478
TDP2	-0.125845	0.776562
RPL7A	-0.126164	0.0215504
SNRNP200	-0.129399	0.039465
HNRNPK	-0.129698	0.0036669
RBM12B	-0.130736	0.135114
RUNX3	-0.131368	0.0433522
CDC40	-0.131624	0.442924
NCL	-0.131751	0.164531
NUDT21	-0.133197	0.64869
ATAD1	-0.138131	0.478431
BANP	-0.14144	0.110125
EXOSC7	-0.144409	0.48867
CCDC12	-0.154768	0.926861
SLTM	-0.156225	0.00298355
UBA1	-0.156677	0.205399
ZZEF1	-0.161893	0.689754
DNAJB4	-0.166062	0.651612
HNRNPH2	-0.167704	0.0357781
LSM2	-0.169194	0.622018
FARSB	-0.178149	0.280302
PEX3	-0.18067	0.89251
PTBP1	-0.181147	0.160089
YLPM1	-0.184561	0.487539
STAT1	-0.186025	0.0814034
OARD1	-0.18653	0.510831
EIF4A3	-0.186638	0.0602333
MBD4	-0.189262	0.267999
STAMBP	-0.190233	0.668879
PPIL4	-0.190362	0.4939
HOXC5	-0.19166	0.555813
SRSF4	-0.195699	0.507732
SNRPB2	-0.198682	0.167488
RBM42	-0.202627	0.0201149
SF3B5	-0.205427	0.229386
NFRKB	-0.2107	0.100402
POLDIP3	-0.216494	0.000482174
LYRM4	-0.2166	0.516677
POLR2C	-0.220485	0.191945
MCM10	-0.2208	0.0173968
UBE2M	-0.220977	0.118458
ZBTB44	-0.221549	0.567769
PTPRC	-0.224002	0.872446
GTF2H2	-0.230571	0.122973
WRN	-0.234151	0.0129187
SEC24A	-0.234763	0.0617904
DUT	-0.236712	0.323395
DCAKD	-0.239398	0.00735994
UGDH	-0.239603	0.329899
YAP1	-0.239827	0.264088
SDE2	-0.244008	0.217821
NELFB	-0.24901	0.0373422
SNRPA1	-0.253471	0.190965
PHF2	-0.255084	0.0154092
SERF2	-0.260145	0.279499
CELF1	-0.267342	0.424517
CHEK1	-0.269982	0.867338
TRAF4	-0.270709	0.512179
EWSR1	-0.278898	0.122842
AP3B1	-0.281624	0.00453122
CUL2	-0.28165	0.426564
POLA2	-0.282568	0.533695
MTF2	-0.287378	0.0104201
SETX	-0.292194	0.0281303
ENSA	-0.292474	0.258612
HNRNPUL2	-0.292877	0.000657137
SRSF7	-0.294212	0.0140377
MAD2L2	-0.294473	0.584154
CDA	-0.298189	0.103584
MPG	-0.301969	0.036401
SNRNP27	-0.303275	0.825871
KLHL18	-0.305024	0.0340023
SMNDC1	-0.306943	0.0143071
GFPT1	-0.307473	0.186106
SERPINB9	-0.310124	0.594427
SCAI	-0.314042	0.268172
RBM19	-0.314294	0.0133696
CSNK1D	-0.316704	0.145257
LSM7	-0.323142	0.0598244
HMGXB3	-0.329826	0.728212
CASZ1	-0.339208	0.0324777
RNMT	-0.34982	0.0107191
CDIPT	-0.353845	0.111611
CD2BP2	-0.355539	0.693086
ATXN1L	-0.356546	0.0705004
ARB2A	-0.358449	0.690692
SEPHS1	-0.364685	0.361438
KMT5A	-0.376032	0.0174753
DPY30	-0.380576	0.312421
EXOSC5	-0.380687	0.277475
MAD2L1BP	-0.381953	0.777686
CRIP2	-0.383938	0.158024
UBQLN4	-0.387358	0.364528
GDPD3	-0.397426	0.0408879
PPIL1	-0.409943	0.0153791
GSK3A	-0.410283	0.543149
C19orf47	-0.41131	0.232359
DSCC1	-0.412409	0.668292
RBM4B	-0.419572	0.17973
YY2	-0.420218	0.768365
HNRNPUL1	-0.423002	0.00178077
TRA2A	-0.429469	0.188744
SSB	-0.431881	0.00605404
INO80E	-0.435036	0.412714
CASK	-0.436789	0.0520173
ZNF350	-0.439761	0.0923779
SNRPB	-0.442434	0.0176491
RBMS2	-0.448025	0.136361
ZNF639	-0.44822	0.022035
THAP1	-0.451975	0.0895049
MYO6	-0.458393	0.0126473
MYADM	-0.464772	0.0312432
EPOP	-0.465891	0.0432802
POGLUT2	-0.474299	0.802141
POLR3C	-0.489937	0.0311164
SEC13	-0.497535	0.0128242
ZNF691	-0.503583	0.0280598
APTX	-0.508514	0.00203191
ZMYND11	-0.509175	6.52215e-05
UBE2T	-0.509956	0.474035
PPM1G	-0.510312	0.0603064
C2orf42	-0.516921	0.0734926
ACYP2	-0.518345	0.0674972
PDCD4	-0.519306	0.0066494
ARHGEF38	-0.523018	0.316787
COPS3	-0.523286	0.106874
MTREX	-0.523806	1.6724e-05
H3-3A	-0.525447	0.258543
ATP6V1C1	-0.525698	0.23757
FANCM	-0.530036	0.0877873
IL37	-0.532689	0.414855
PDCD11	-0.536702	0.00348546
SNAPC2	-0.538079	0.455613
TDP1	-0.540834	0.000543116
RAB3GAP1	-0.550052	0.00854189
GTF2E2	-0.55008	0.594138
ADPRS	-0.554605	0.376081
FIBP	-0.558427	0.0777023
SUMO2	-0.558675	0.00456125
ADAR	-0.559074	0.000170555
MED28	-0.56359	0.0658166
UBE2I	-0.565329	0.0312048
SRSF1	-0.572868	0.000666448
MCEE	-0.574314	0.622193
C2orf49	-0.57503	0.167849
USP24	-0.578233	0.412853
MED7	-0.578623	0.209066
RAD52	-0.58158	0.0442137
APOBEC3B	-0.585681	0.034593
AGL	-0.594186	0.0947821
INO80C	-0.600557	0.0556269
HNRNPL	-0.604467	0.000160492
STXBP3	-0.606947	0.00972582
DCUN1D1	-0.609616	0.0151087
SRSF11	-0.609985	0.119173
CDKN2AIP	-0.623597	0.00444019
BAG1	-0.624154	0.00469873
DPH1	-0.631755	0.285314
FMN1	-0.634468	0.467992
SKIC2	-0.639623	0.0124902
NRDC	-0.640349	0.0176956
TIAL1	-0.64055	0.000188898
APOC3	-0.642529	0.0527295
NCBP2	-0.643628	0.319423
ANP32A	-0.648602	0.0208631
PCBP1	-0.652897	0.00200622
WDR25	-0.660738	0.295105
PPP4R1	-0.663721	0.153194
GEMIN6	-0.664624	0.654656
C5orf24	-0.66579	0.00686382
SUMO3	-0.66623	0.0106381
RBM8A	-0.668072	0.0193551
FBXO28	-0.669855	0.0227253
GSK3B	-0.67565	0.135812
MOB2	-0.689122	0.552927
HSPA8	-0.715062	3.07899e-05
TSNAX	-0.718245	0.0113911
COPS4	-0.719032	0.00823365
ABI2	-0.720222	0.127299
NAE1	-0.725366	0.0393275
MYO1E	-0.7261	6.46263e-07
CCDC127	-0.726402	0.561988
SNRNP35	-0.727865	0.11455
PPP4R3A	-0.734433	0.010686
ZNF444	-0.734896	0.0807985
RTCB	-0.735171	0.000590354
UBR4	-0.735767	0.349406
HNRNPU	-0.738343	6.05112e-05
RBM4	-0.738989	9.10309e-05
RALY	-0.740073	0.000721055
PTPN2	-0.741351	0.618888
HNRNPC	-0.745461	0.00255074
THY1	-0.748178	0.279596
SRSF9	-0.750847	0.000378131
RBM28	-0.756239	3.31995e-05
COPS6	-0.756924	0.00198473
ZNF326	-0.760108	0.000274493
DRG1	-0.760713	0.00514508
FAM76B	-0.76376	0.519327
GSS	-0.7665	0.0102038
TRIP12	-0.778216	3.09179e-06
RTRAF	-0.784465	0.00506238
PDXK	-0.788201	0.107693
FAM83A	-0.790225	0.00710371
MIDEAS	-0.790405	7.49609e-05
MED9	-0.795295	0.0478488
PRMT1	-0.802986	0.012512
NABP1	-0.809474	0.0048062
GPS2	-0.810501	0.358952
HNRNPR	-0.816954	0.00018082
TRIM27	-0.8183	0.0807619
SRSF6	-0.819872	0.00661078
ARRB2	-0.826168	0.00087147
ARMC8	-0.832987	0.0667612
BRCC3	-0.833719	0.190893
CWC15	-0.847247	0.485625
H1-2	-0.855258	0.00574965
KRT77	-0.863415	0.000247281
ZNF460	-0.866612	0.524843
DNAJC7	-0.867398	0.00818814
ANAPC11	-0.867787	0.644877
KDM5C	-0.869172	0.138138
SSBP3	-0.887922	0.0934444
DDA1	-0.889177	0.156046
HAT1	-0.892355	0.321825
PSME3	-0.897783	0.00704207
PSMD4	-0.902457	0.00240394
ECPAS	-0.907297	0.000510963
HNRNPH3	-0.917732	0.000310961
UNC45A	-0.919542	0.00283439
TXNRD1	-0.922892	0.0229288
PPIL3	-0.924755	0.176707
NAA50	-0.925877	0.0154869
HNRNPD	-0.928888	3.51996e-06
PAXX	-0.936822	0.13206
SRSF2	-0.937351	0.101593
SMUG1	-0.947102	0.0065236
ELAVL1	-0.949307	0.000102197
SYNCRIP	-0.955083	1.26042e-05
ALYREF	-0.970466	0.000116283
C11orf54	-0.980081	0.00801562
SEC24B	-0.996981	0.00401561
RAB9A	-0.999402	0.00107658
LUC7L2	-1.00362	0.00682785
GCLC	-1.00707	0.0553239
UPP1	-1.02914	0.00840012
RDH14	-1.03017	0.062881
S100A4	-1.03736	0.000111002
TXNL4A	-1.04075	0.520271
RAB8A	-1.04311	0.00184455
TMUB1	-1.04971	0.224458
DNAJB6	-1.05297	0.00581044
BRK1	-1.06871	0.00776388
MAP2K4	-1.07247	0.3669
PPIE	-1.07307	0.0452246
UBA2	-1.07345	0.00210236
DCTN5	-1.07917	0.434712
ILF2	-1.1077	3.3545e-07
MYOD1	-1.11002	0.000356696
ERCC5	-1.11541	0.278842
ENOPH1	-1.11692	0.0112433
WDR13	-1.11927	0.0104688
SERPINB8	-1.12337	0.00276336
ADARB1	-1.12503	0.000899607
PHLDA2	-1.12516	0.157905
MLF2	-1.12631	0.000896997
COPS8	-1.13642	0.0027322
SELENBP1	-1.1416	0.00257864
DAZAP1	-1.14861	0.000250688
NANS	-1.16754	0.0301721
TRIP4	-1.17177	0.422648
PSMD7	-1.1731	0.000676757
MEAF6	-1.17361	0.457598
KCTD14	-1.18271	0.579102
MAPK3	-1.19783	0.257708
PTBP3	-1.20502	0.00023932
DNPH1	-1.2062	0.00819491
PARP4	-1.21397	0.0905396
UACA	-1.22519	5.105e-06
UBXN7	-1.23523	0.00851059
POLE3	-1.24376	0.430349
PRKAA1	-1.24964	0.0105816
DLG3	-1.27435	0.0362296
RPS6KA3	-1.2855	0.000102608
RTCA	-1.29419	0.0455731
CHD7	-1.2966	1.01619e-05
NPEPL1	-1.30182	0.0276636
HNRNPDL	-1.30192	4.48737e-05
PSMD14	-1.31767	0.133179
ARIH1	-1.32063	0.00268617
SAMHD1	-1.32661	2.5487e-05
SRSF3	-1.32863	9.45871e-05
PBX3	-1.33236	0.578157
ANP32B	-1.33866	0.000254661
IGSF3	-1.34485	0.0185064
SRSF10	-1.35967	0.00126621
MON2	-1.36761	0.0137272
EIPR1	-1.37152	0.176689
TKT	-1.39129	1.72147e-05
CPNE1	-1.40061	0.00561947
HNRNPAB	-1.40699	3.01044e-05
FKBP5	-1.41364	0.00161244
TRPM4	-1.4234	0.0123363
PSMB1	-1.42679	5.09673e-05
ANXA11	-1.43111	3.32742e-06
PAK2	-1.43559	0.00263665
PEPD	-1.44302	0.00187484
MAT2A	-1.44637	5.16315e-05
PCYT1A	-1.45137	0.000592901
SRM	-1.47245	0.00589372
COPS7B	-1.47717	0.156638
HNRNPA1L2	-1.49006	0.000180432
PTPN23	-1.50028	0.00155843
C9orf78	-1.5108	0.506107
PCBD1	-1.51192	0.000131985
PPME1	-1.51942	6.69479e-05
CNOT2	-1.51961	0.0548253
NAP1L4	-1.52185	0.000790015
CPA4	-1.52233	9.19346e-06
HNRNPA2B1	-1.528	6.06423e-06
IMPA2	-1.53306	0.00364395
SET	-1.53365	0.000173848
RBM45	-1.56163	6.21951e-05
CYSRT1	-1.56262	0.0718502
VWA5A	-1.57279	0.0513331
PSMD3	-1.57328	1.31447e-06
UBQLN1	-1.57583	0.00375465
CBR1	-1.58746	0.0437884
EIF3L	-1.58976	7.91377e-05
AMPD3	-1.59836	0.0405878
PSMB2	-1.60081	0.000410161
DIP2A	-1.62892	0.0134711
MYG1	-1.64132	0.00125942
RBM7	-1.64507	0.0127577
STN1	-1.65053	0.0393865
RAI14	-1.65187	4.54061e-06
NAXE	-1.66055	0.00145956
PSMB4	-1.67768	5.84677e-05
RALGAPB	-1.67843	0.0257854
HNRNPA1	-1.68271	5.06523e-07
PGP	-1.68554	0.0460386
RACK1	-1.68685	0.000384524
ENDOD1	-1.718	0.00150112
GDA	-1.72085	0.000450109
COPS5	-1.7269	0.00612425
PSMA6	-1.75149	0.00121129
RAB5A	-1.76447	0.000110319
DERA	-1.7774	3.31328e-05
RBMX	-1.77821	4.46597e-07
ABHD14B	-1.78319	0.00470325
TPBG	-1.80243	0.0326018
SKIC3	-1.80697	0.000129442
CYRIB	-1.80738	0.0012001
PSMA1	-1.82789	4.33793e-05
SPTBN4	-1.8318	0.00628073
TLE3	-1.83188	0.00126395
SUB1	-1.83429	8.995e-06
STAU2	-1.85777	0.0338512
HNRNPA3	-1.87869	2.43209e-07
FCHSD1	-1.89891	0.0188336
EEF1D	-1.90607	6.71596e-07
UBE2A	-1.91884	0.262288
RBM14	-1.92338	3.29299e-08
SRSF5	-1.92478	0.0135552
SGTA	-1.95455	0.0741826
LSM3	-1.95662	0.118301
TPPP3	-1.9698	0.00744483
DNAJB1	-1.9748	3.28841e-06
RBMXL1	-1.97928	1.97534e-05
PSMD13	-1.98741	5.18178e-07
ASCC1	-2.00506	0.248812
NPC1	-2.0406	0.00111843
ACP1	-2.04456	0.000891926
SPAG7	-2.0501	0.0425003
GET3	-2.05852	0.00184139
STEAP4	-2.07967	0.0122292
PSMB7	-2.10174	0.000842113
PHLDB3	-2.11459	0.0105508
ADI1	-2.11947	0.0504699
TPRG1	-2.15231	0.00413079
SEC11C	-2.21072	0.0123945
CIRBP	-2.21881	0.00208512
PKP1	-2.25152	3.00706e-06
PMM2	-2.25313	0.002346
MACROH2A1	-2.26856	8.02632e-05
TATDN1	-2.26988	0.173661
PAAF1	-2.34453	3.11646e-05
CRKL	-2.37812	0.00677685
ME1	-2.38527	0.000289982
NAMPT	-2.40443	0.000489509
ARPC2	-2.40592	6.55117e-06
CIC	-2.4101	0.125334
MYH14	-2.46185	1.88456e-05
NME3	-2.48341	0.353631
PTPA	-2.50177	0.000445871
RBM3	-2.50658	2.20772e-06
HECTD1	-2.52361	2.71314e-07
BCL2L2	-2.5335	0.00856937
DLST	-2.53391	0.00021748
PPP4C	-2.55509	0.00273865
HNRNPA0	-2.55904	6.89595e-07
GPATCH11	-2.56282	0.417641
PIN1	-2.56317	0.00380813
GATD1	-2.57631	0.000338214
UBE2O	-2.58121	0.00137574
GRB2	-2.59298	0.012917
ARPC3	-2.59311	3.75706e-05
ZCCHC8	-2.61097	1.93791e-06
ARMT1	-2.65469	0.00199876
UBE2V2	-2.70648	1.02273e-05
MCC	-2.71493	0.037644
ZSCAN26	-2.7265	0.000789916
GMPPA	-2.7505	0.00289617
LGALSL	-2.75347	2.17332e-05
MAN2B1	-2.76703	0.00288508
YJU2	-2.81146	0.219784
MACROD1	-2.81232	0.000104631
PEF1	-2.82986	0.00263517
CDK5	-2.84019	0.00569418
PPP1R7	-2.88072	0.00339624
HTT	-2.95904	0.00027987
S100P	-3.01656	7.97307e-08
DHRS1	-3.02566	0.018435
MYCBP2	-3.03974	0.0388636
MYCBP	-3.04156	8.34683e-05
ARL2	-3.05694	0.046349
FKBP15	-3.15527	0.0010237
TPI1	-3.15831	8.77463e-08
ANXA5	-3.24537	8.54116e-06
UBE2V1	-3.25397	0.0161976
LAMTOR2	-3.26777	0.00353004
PGAM1	-3.27813	2.49478e-05
CMPK1	-3.31152	0.000131277
NSFL1C	-3.34949	1.08387e-07
PGLS	-3.35074	1.57941e-06
CLIC3	-3.37832	0.000771909
ATP6V1G1	-3.41549	0.00153041
SDCBP2	-3.44893	0.000114912
NUDT16	-3.45962	0.00853729
RRAGC	-3.55171	0.000516842
MALT1	-3.66978	3.81959e-05
UBE2N	-3.69399	5.85011e-06
SHPK	-3.74424	9.16357e-06
PTMA	-3.79014	0.00650375
PTK6	-3.79767	1.17183e-05
CAPG	-3.8256	5.16067e-06
HDDC2	-3.83721	0.00221324
ANKS1B	-3.86031	7.79513e-05
NT5DC1	-3.87592	0.222296
NLRP10	-3.91354	2.93229e-05
ALDOC	-3.93567	0.00144698
BABAM1	-3.9368	0.116276
USP46	-3.95755	0.012143
TMPRSS13	-4.08946	0.000281368
RPP25L	-4.24418	0.000456262
ARRB1	-4.2719	1.98638e-06
ESRP1	-4.37389	0.000985716
LRP10	-4.72085	6.45303e-06
NR1H3	-4.8107	0.034872
DCK	-4.83117	4.68039e-06
GRHL1	-4.87743	0.00022631
TOR1A	-4.89375	0.121655
DDX19B	-4.94936	0.00317618
KCTD10	-5.00536	2.0737e-05
DPH2	-5.09264	0.00342186
DUSP3	-5.11156	0.000466936
OVCA2	-5.12724	4.44086e-05
GNAQ	-5.15645	1.28245e-05
TMEM41A	-5.16676	0.122113
PTPN6	-5.2071	7.44859e-05
LZIC	-5.29498	0.00158022
ANXA8L1	-5.29944	1.85625e-05
ITPKC	-5.34544	0.0016687
ABRACL	-5.4182	0.00212377
APOBEC3A	-5.43922	0.000329332
TAX1BP3	-5.46778	0.00393301
EPHX3	-5.52424	0.00541792
CRYBG2	-5.563	0.000169478
RANBP3	-5.65487	0.00067683
ATOX1	-5.68551	1.19174e-05
DCPS	-5.79726	0.00129631
SH3BGRL3	-5.87051	0.000630074
VSIG10L	-5.99856	2.7699e-06
CIAO1	-6.00821	0.0105031
NKIRAS2	-6.04486	0.00053112
OSGEP	-6.10017	0.000603915
BPNT1	-6.18237	2.73253e-05
UBLCP1	-6.32003	0.019242
[truncated: 18 more rows]

## Sheet: S4
Gene	LOG2-FC	p-value
GTPBP4	1.16643	1.92398e-14
XPC	-1.46973	6.9632e-14
ATF3	-2.64055	8.48879e-14
NAT10	-0.675229	1.29365e-13
HNRNPM	0.970104	1.34278e-13
HNRNPL	1.20048	2.3752e-13
RPL22	1.21325	5.24634e-13
RFC4	0.831981	7.38258e-13
KRT77	-1.94621	8.71375e-13
KPNA2	1.63442	1.0789e-12
RPL18A	0.947628	1.34146e-12
RFC3	0.871094	2.13848e-12
SUB1	1.1252	2.24221e-12
RPF1	-1.5248	2.2448e-12
PARP1	-0.574872	3.11919e-12
RRP12	-0.870308	4.36606e-12
MPG	0.929779	4.68517e-12
RBMX	1.49455	4.72175e-12
RPL7A	-0.709105	6.99586e-12
POLDIP3	0.90497	7.02331e-12
HNRNPA2B1	1.02786	1.03506e-11
EBNA1BP2	-0.831026	1.101e-11
FTSJ3	-0.741993	1.15614e-11
SYNCRIP	0.881321	1.36674e-11
WDR76	0.893294	1.48343e-11
ARGLU1	1.89256	1.57441e-11
HNRNPH1	1.38182	1.74115e-11
FOSL2	-1.12952	1.95677e-11
H1-4	1.15618	1.9655e-11
MECP2	-1.01744	2.00185e-11
RBM39	1.49148	2.49722e-11
PCBP1	1.15371	3.05481e-11
HNRNPUL2	-1.12634	3.26498e-11
PKP1	-1.47061	3.28884e-11
MEF2A	4.4685	3.5183e-11
RIOX1	-0.770972	3.78501e-11
RAD23B	-1.0935	4.82941e-11
HNRNPDL	0.941463	6.93518e-11
ELAVL1	1.46459	7.16965e-11
SMARCA5	-1.06782	7.25518e-11
HNRNPH3	1.29871	9.05487e-11
EGR1	2.18259	1.36332e-10
DHX37	-0.781335	1.47522e-10
DDX56	-1.58473	1.91794e-10
DEK	0.993509	1.96407e-10
HNRNPA1L2	0.78267	1.98518e-10
SRP14	1.10063	2.11877e-10
FOXP1	1.99614	2.37423e-10
GNL3L	1.04775	3.52236e-10
EEF1D	1.35224	3.57136e-10
CIZ1	-1.65732	3.73732e-10
USF2	0.946671	3.88642e-10
DDX27	-1.02717	4.08705e-10
HNRNPU	-0.539523	5.79194e-10
HNRNPR	0.720003	5.95888e-10
SRSF10	1.09337	6.70982e-10
NFIL3	-0.890511	7.04414e-10
C16orf87	2.42914	7.29306e-10
NR2F6	1.7337	7.57822e-10
KNOP1	-0.519766	7.9014e-10
CEBPB	0.635669	8.92568e-10
POLR1C	0.968602	9.78123e-10
NOP58	-0.769793	9.83177e-10
CXXC5	2.16843	1.05694e-09
RXRA	1.72063	1.10182e-09
HP1BP3	-0.633455	1.19529e-09
TAF6	0.473785	1.2099e-09
SURF6	-0.677154	1.36862e-09
DDX10	-0.747736	1.37129e-09
TCOF1	-0.383302	1.63673e-09
HNRNPC	0.89637	1.6408e-09
FUBP3	1.15265	1.81683e-09
RFC1	-0.406437	1.93426e-09
LMNB2	0.609455	2.20538e-09
BEND3	1.44633	2.49831e-09
HNRNPA3	0.607148	2.96604e-09
GABPA	1.18457	3.00455e-09
DDX55	-0.643303	3.26846e-09
DDX5	0.799384	3.51973e-09
NOL10	-0.714077	3.63688e-09
MAX	0.918172	3.85147e-09
RPS19	0.664061	4.21719e-09
TTF1	-0.560889	5.09257e-09
RBM3	2.30471	5.42714e-09
POP1	-0.531632	5.4562e-09
FUBP1	0.76513	5.73543e-09
DHX15	0.569712	5.80726e-09
NOC3L	-0.408524	6.00786e-09
NOP2	-0.813927	6.40306e-09
NCL	-0.566028	6.74638e-09
MATR3	0.761809	7.06267e-09
NR2F2	1.15123	7.20308e-09
KDM2A	1.05836	7.27771e-09
BUB3	1.18888	7.52504e-09
NUDT21	1.37648	8.64534e-09
H1-0	-0.516569	9.35749e-09
SNRPD3	1.22081	9.38874e-09
NOP56	-0.514422	1.00888e-08
RFC5	0.627978	1.02321e-08
TAF7	0.549877	1.17031e-08
LMNB1	0.818425	1.2492e-08
HOXC9	1.67674	1.28296e-08
FAM32A	1.27757	1.31365e-08
CTCF	-0.779153	1.3295e-08
HLTF	0.678923	1.43606e-08
PDCD11	-0.441309	1.46415e-08
SRSF1	0.828009	1.61243e-08
JUND	-0.834294	1.6731e-08
MXI1	2.11819	1.80364e-08
LUC7L	1.89222	1.84098e-08
RALY	0.897997	1.88293e-08
NPM1	-0.944175	1.88293e-08
PRPF19	0.663869	1.90633e-08
RXRB	1.49716	2.25836e-08
LMNA	0.414658	2.35048e-08
DDX41	-0.359254	2.37652e-08
H1-10	-0.720635	2.41127e-08
KLF16	1.98294	2.54362e-08
CNBP	0.746379	2.60001e-08
LUC7L2	1.71557	2.69401e-08
HMGN2	1.40492	2.73783e-08
HMGA1	-0.83412	2.86171e-08
REXO4	0.301748	2.98684e-08
HNRNPF	0.999557	3.00893e-08
ILF2	1.44926	3.20906e-08
PHF6	0.955538	3.51203e-08
TEX10	-0.617398	3.5585e-08
ZNF326	1.06722	3.72422e-08
RBIS	0.713427	3.77501e-08
DLX1	0.649739	3.92845e-08
GATAD2B	0.869114	4.17163e-08
HNRNPK	0.707429	4.36422e-08
APOBEC3B	1.96753	4.58333e-08
UTP3	-1.04915	4.63712e-08
PURB	0.658325	4.70588e-08
TARDBP	1.01319	4.80349e-08
TRIM28	-0.978494	4.94323e-08
HSPA8	0.506311	5.1383e-08
TRA2B	0.913756	5.50499e-08
UTP18	0.815744	5.60001e-08
TCF7L2	0.998296	5.92821e-08
TAF10	0.750217	6.31623e-08
UTP11	-0.959382	6.59273e-08
TAF8	0.374593	6.63339e-08
ZNF579	-0.837314	6.75589e-08
ZNF131	1.12073	6.78037e-08
ELK1	1.16875	8.54527e-08
MAK16	-0.71741	9.82611e-08
RRS1	-0.920113	9.84273e-08
SNRPA1	0.923562	1.00232e-07
RPL27	0.382399	1.01259e-07
RBM4	0.877231	1.11788e-07
PCGF1	1.14045	1.12751e-07
ZNF768	-0.943113	1.15742e-07
RAN	0.556117	1.25471e-07
HMGB1	1.08907	1.25581e-07
SIX2	0.905655	1.27083e-07
ASH2L	0.522069	1.31123e-07
TMA7	4.54065	1.45569e-07
POLR2E	0.875905	1.48094e-07
RCC1	0.474811	1.50109e-07
FOXF2	1.40984	1.52755e-07
UTP14A	-0.537116	1.55721e-07
SARNP	0.484301	1.57585e-07
RBM28	-1.03729	1.57895e-07
SUZ12	-0.78622	1.66198e-07
TAF9	0.524823	1.7247e-07
RBMX2	1.17767	1.80286e-07
NFKB1	0.624162	1.80397e-07
HMGB3	0.854713	1.88292e-07
DHX9	0.461439	1.88543e-07
U2AF1	0.636207	1.96776e-07
HMGN4	1.07889	1.98734e-07
RARG	1.82349	2.06189e-07
RBBP6	-0.860129	2.14911e-07
PINX1	-0.922609	2.16764e-07
TMA16	0.984153	2.19209e-07
JUN	-1.34112	2.22499e-07
TIAL1	1.07413	2.28047e-07
SUGP2	-1.08749	2.38156e-07
NONO	0.590774	2.3891e-07
PTBP3	1.2804	2.3998e-07
THOC6	0.632133	2.41562e-07
BAZ1B	-1.07089	2.45257e-07
YY1	0.518127	2.52467e-07
ETV6	1.43474	2.56513e-07
DKC1	-0.435434	2.72236e-07
NR2C2	0.28436	2.80295e-07
NR2C1	0.986159	2.82062e-07
RECQL	0.485283	2.86184e-07
SAP30L	3.24248	3.09049e-07
PTBP1	1.10508	3.22943e-07
GDPD3	-2.13749	3.26501e-07
MEF2D	1.7081	3.32097e-07
MPHOSPH10	-0.591337	3.89327e-07
SAP30	1.71852	3.92853e-07
NEPRO	-0.676553	4.03506e-07
TAF9B	0.390747	4.32311e-07
SP3	1.19723	4.33795e-07
HMGB2	0.841513	4.81604e-07
BMAL1	0.411016	5.28572e-07
EIF6	0.499724	5.56479e-07
RBX1	0.470653	5.7976e-07
RRP7A	-0.97884	5.86615e-07
MNT	1.44939	5.90303e-07
DDX17	0.424657	6.02882e-07
KLF5	1.1648	6.0732e-07
USF1	0.586418	6.19193e-07
UHRF1	0.792577	6.37538e-07
PUF60	0.607283	7.11545e-07
GNL2	-0.259126	7.13887e-07
DDB1	-0.249928	7.17921e-07
THRAP3	-0.964904	7.28571e-07
NSA2	-0.336739	7.5126e-07
HMCES	0.860056	8.01633e-07
ATAD5	1.0988	8.04729e-07
TRA2A	1.12763	8.05551e-07
TPI1	0.821338	8.24327e-07
PNKP	0.319159	8.79568e-07
ZNF512B	-0.637094	8.88896e-07
RACK1	0.713845	9.13092e-07
WDR46	-0.941363	9.51431e-07
SERPINB8	-1.10476	9.69338e-07
H1-2	-0.581808	9.81355e-07
SP2	0.852414	1.23138e-06
FOXK1	1.18541	1.25363e-06
RFC2	0.443448	1.26647e-06
LAS1L	0.570179	1.28159e-06
EZH2	-1.02626	1.40261e-06
ADAR	0.566261	1.49998e-06
BUD31	1.13119	1.58468e-06
NUMA1	0.190246	1.59631e-06
MCM3	-0.675369	1.62024e-06
PCNA	0.905951	1.84418e-06
TWIST2	-1.08253	1.86824e-06
NOM1	-0.28009	2.03202e-06
GLYR1	-0.666167	2.13046e-06
RBBP4	0.458756	2.22908e-06
MAZ	0.597263	2.26319e-06
AURKB	1.05754	2.36032e-06
BANF1	-1.59195	2.48603e-06
ATF1	0.615671	2.51584e-06
ZNF512	-0.999481	2.56044e-06
THAP11	0.602617	2.58812e-06
RMI2	-0.627251	2.59726e-06
DIMT1	-0.203629	2.60873e-06
POLR1E	0.521028	2.6423e-06
MAFF	-1.10422	2.70817e-06
SELENOH	-0.613411	2.7864e-06
ETV3	1.36528	2.80085e-06
API5	0.396485	2.87208e-06
PAK1IP1	0.563175	2.97057e-06
SRSF7	0.417194	3.11693e-06
CDCA2	0.737267	3.34743e-06
MAFK	-1.16526	3.40405e-06
PATZ1	0.937096	3.40626e-06
SDAD1	-0.27117	3.43902e-06
FOSL1	-1.93255	3.44419e-06
VEZF1	0.976621	3.52475e-06
ELK3	1.63162	3.54658e-06
FBXL6	0.516863	3.54925e-06
SF3A3	0.715196	3.56711e-06
THY1	1.46257	3.56994e-06
CPA4	-1.58692	3.62466e-06
KDM1A	-0.448026	3.81901e-06
NFIB	0.217453	3.84809e-06
USP7	-0.585446	4.05461e-06
RPA2	0.272107	4.09198e-06
TMPO	0.297706	4.19303e-06
HNRNPH2	0.746014	4.23833e-06
DNAJC9	0.585938	4.43008e-06
AK6	4.76714	4.46225e-06
BLM	-0.195386	4.56452e-06
SRSF9	0.855085	5.22803e-06
GABPB2	3.26311	5.72022e-06
SRSF2	0.943202	6.23869e-06
MBD1	-0.74468	6.39051e-06
CDC73	0.553045	6.48261e-06
EIF4A3	0.544396	6.54351e-06
ZNF143	0.832873	6.60289e-06
MEN1	0.311396	7.51788e-06
NOP10	-0.435196	8.13496e-06
XRCC6	-0.163846	8.15685e-06
ZC3H14	-0.667696	8.59468e-06
C14orf93	0.824071	9.02465e-06
PRPF4B	-0.396626	9.14484e-06
TMPO	0.488461	9.26508e-06
ZNF740	0.384062	9.6612e-06
CDC5L	-0.541051	9.8439e-06
DDX31	-0.320733	9.9044e-06
POLR2F	1.04762	1.00926e-05
PML	-0.61964	1.01969e-05
SINHCAF	0.772948	1.0725e-05
TIA1	1.38798	1.0904e-05
DHX33	-0.507092	1.09531e-05
ZBTB21	0.716392	1.09745e-05
WDR5	0.705939	1.13051e-05
HCFC1	0.351539	1.14998e-05
BBX	0.4202	1.16721e-05
NKRF	-0.374877	1.17775e-05
CENPV	-0.230028	1.21506e-05
L3MBTL2	-0.432978	1.26523e-05
MUS81	-0.600212	1.29878e-05
GATA2	1.30485	1.31574e-05
MCM6	-0.936164	1.42891e-05
TDP1	1.25449	1.42896e-05
RREB1	-0.553236	1.45265e-05
GATAD2A	0.824796	1.45749e-05
NACC1	0.756347	1.4643e-05
HMGN3	0.430804	1.56703e-05
HNRNPA0	0.520983	1.61344e-05
ZBTB7A	1.30496	1.65091e-05
PCID2	0.820321	1.6911e-05
PSMB4	-0.83856	1.75499e-05
SUMO3	0.670991	1.76372e-05
COIL	0.750609	1.80843e-05
CBX8	0.512619	1.81509e-05
C1orf35	-0.28397	1.83865e-05
SPTY2D1	-0.658156	1.91149e-05
SF3B5	1.55954	1.95458e-05
PSMB1	-0.817951	2.03628e-05
FLYWCH1	-0.819392	2.07305e-05
SRSF6	0.959855	2.20774e-05
SNRPA	0.615384	2.22014e-05
MSH6	0.370257	2.35033e-05
CELF1	0.842029	2.39123e-05
NOC4L	-0.283304	2.40264e-05
POLR2L	1.11154	2.42129e-05
SENP3	-0.567434	2.46322e-05
CUL4A	-0.628337	2.58235e-05
TEAD1	0.710867	2.5987e-05
GMEB2	1.63925	2.61679e-05
ACTL6A	0.663605	2.80595e-05
RTRAF	0.763513	2.99344e-05
FOS	-1.28072	3.00475e-05
SKI	-1.09027	3.04196e-05
MBNL2	1.98197	3.06297e-05
DAZAP1	1.09162	3.09689e-05
MYADM	3.77572	3.10231e-05
PWWP2A	-1.39526	3.13706e-05
TOP2A	0.467604	3.15721e-05
RACGAP1	0.664931	3.18299e-05
LDB1	2.38393	3.18379e-05
H1-1	-0.3767	3.33249e-05
FEN1	0.856292	3.46233e-05
NRF1	0.507581	3.60686e-05
NOL9	-0.54183	3.66336e-05
TGIF1	0.837978	3.71113e-05
SLFN5	-0.956928	3.76086e-05
TAF5L	0.670881	3.89279e-05
IMPA2	-1.33496	3.9465e-05
C15orf61	1.03945	4.03165e-05
NAA50	0.710336	4.04807e-05
ZFX	-0.884882	4.14202e-05
CGGBP1	0.646266	4.31688e-05
CREB1	0.196376	4.58547e-05
SNRPB2	1.27707	5.29592e-05
GTF2IRD1	3.06596	5.35057e-05
ZNF362	-0.550545	5.78072e-05
BUD13	1.09607	5.79398e-05
EMG1	0.40049	5.79856e-05
SNW1	0.554511	6.13579e-05
CSNK1D	0.55683	6.21817e-05
S100P	-1.0709	6.29008e-05
NFIC	0.265701	6.3564e-05
MSH3	-0.321551	6.3618e-05
DDX23	0.417603	7.05777e-05
ORC1	-0.540768	7.20061e-05
WTAP	0.775777	7.42045e-05
PWP1	-1.87122	7.74318e-05
FOXA1	0.998985	7.8523e-05
PHF5A	1.21855	7.91776e-05
ZBTB24	-0.747019	7.95109e-05
FAAP24	3.8283	8.44442e-05
NABP1	2.63217	8.65421e-05
LSM10	3.82509	8.76626e-05
POLR2K	2.71773	8.9421e-05
RIF1	1.03543	8.96577e-05
ZSCAN25	-0.799159	9.18909e-05
NR4A1	0.652457	9.66228e-05
PRKDC	0.189458	0.000106746
RTCB	0.568148	0.00010697
TFDP1	0.633645	0.000107925
RPA1	0.154649	0.000108351
INTS6	-0.540056	0.000109249
GTF3C5	0.470407	0.000112513
UBE2M	1.07393	0.000116409
PTMA	0.694867	0.000116684
ZNF771	0.765679	0.000120049
DDX42	-0.56503	0.000122235
PABPN1	-0.573961	0.000124245
SLC25A12	0.482364	0.000129579
NOLC1	0.356475	0.00013481
DCUN1D5	0.513709	0.000137201
DDX52	0.366294	0.000140739
CLOCK	0.349208	0.000146029
HDGF	0.668705	0.000146174
IMP3	-0.216004	0.000147987
ZNF148	0.489994	0.000154346
RRP36	-0.425625	0.000167145
TFAP2A	-0.243604	0.000172014
ARPC3	1.14723	0.000174075
SEPHS1	1.17373	0.000175533
RYBP	2.02694	0.000176551
POLL	0.813037	0.00019438
POLE3	0.91217	0.000196958
KLF12	1.9515	0.000197886
SSBP3	3.08594	0.000199839
RAB5A	0.602255	0.000212391
UBTF	-0.471256	0.000213287
MED1	0.988834	0.000213862
ZBTB11	-1.55888	0.000215937
TBX3	0.511762	0.000217203
RAE1	0.270205	0.000219417
PUM3	-0.697012	0.000226954
FGF2	0.377623	0.000231216
LRIF1	-0.865098	0.000234447
JUNB	0.175344	0.000249832
RUNX1	-0.332925	0.000253126
HMGN1	-0.751679	0.000254499
TAF4	-0.177242	0.000268846
WDR18	-0.403761	0.000270392
KHSRP	0.326666	0.000271656
DUSP11	0.324437	0.000274194
ALYREF	0.175049	0.00027785
POLR2H	0.596568	0.000286199
E2F6	0.816847	0.000287342
HNRNPA1	1.01914	0.00029819
SRSF3	0.630084	0.000302363
USP36	-0.387154	0.000306881
APTX	0.422209	0.000316386
CHTOP	-0.179773	0.000322636
SF3A2	1.08152	0.000333376
BANP	1.25706	0.000334991
DNAJB6	0.501095	0.000340505
NOP14	-0.327395	0.000348607
MCM7	-0.606207	0.000362402
RBBP7	0.488073	0.000364176
RPL22L1	0.872001	0.000368673
RPRD1B	0.498581	0.00037306
EME1	-0.531371	0.00037435
USP39	0.512199	0.000417287
PPIL1	0.825409	0.000425941
NUSAP1	-0.131845	0.000457343
H1-5	0.27992	0.000463098
NIFK	0.193252	0.000471927
TMEM201	0.740719	0.000480451
RBM4B	2.57845	0.000481423
CPSF7	0.562349	0.0004887
NUP153	-0.307519	0.0005052
PQBP1	1.44981	0.000509336
MIER1	1.59036	0.000522987
GSS	-0.588391	0.000562443
LRWD1	1.25084	0.000567096
TIGD2	-0.20544	0.000570291
GAPDHS	-1.38234	0.000586071
VDR	0.960093	0.000595391
HNRNPAB	-0.46572	0.000598849
SMPD4	0.260989	0.000609999
PELO	1.53358	0.000611631
ACTR8	1.20248	0.000643031
UBE2V1	6.01141	0.000666299
C18orf21	0.779577	0.000678524
SERF2	2.50642	0.000681576
SFPQ	0.230372	0.000690116
UBN1	-0.569182	0.000697103
PCNP	0.707061	0.000704225
KLF3	0.455174	0.00070788
MED4	0.466846	0.000718909
SRM	0.820761	0.000728793
SRRM1	1.78676	0.00073201
DAXX	-0.977477	0.000746203
FYTTD1	0.0963473	0.00078459
MBNL1	0.524167	0.000791366
GRWD1	-0.608271	0.000799619
ZNF668	-0.187995	0.000822141
PBX2	0.382756	0.000833028
GSK3B	1.56285	0.000837005
TRIP12	0.347747	0.000864995
KRR1	-0.435805	0.000901586
CBX2	1.92668	0.000904415
MSH2	0.129221	0.000958957
RFXAP	0.643268	0.000977422
IK	0.723702	0.00104752
CHRAC1	0.951322	0.00105036
RBM22	0.870771	0.00108244
RBM25	1.0306	0.00110889
BHLHE40	-0.472832	0.00112235
ZNF787	2.22234	0.00114922
SMC1A	-0.778284	0.00120811
ING1	2.29608	0.00124792
KCTD15	1.33304	0.00125878
RRP9	-0.297732	0.00130148
DRG1	0.675776	0.00132179
SF1	-0.299837	0.00135615
MAD2L2	4.58867	0.00137972
GTF2F1	2.22857	0.00138273
POP4	-0.2509	0.00139985
ARPC2	0.410762	0.00145412
PIMREG	-1.16525	0.00148664
ELK4	1.04539	0.00150513
PSMA6	-0.573957	0.00153931
ZKSCAN1	-0.531505	0.00154424
MTA2	0.297166	0.00165484
MCM2	-0.50327	0.00167128
CENATAC	0.808969	0.00168356
SUPT16H	-1.75252	0.00170842
HDAC1	0.321491	0.00172679
DUT	1.35136	0.00173946
MLX	0.867864	0.00174106
FCF1	-0.211334	0.00188194
RBBP5	0.230256	0.00188659
GPATCH11	1.74555	0.00194119
DHX35	0.740886	0.00201799
CDYL	0.49639	0.0020202
FIZ1	0.814335	0.00206528
RBM45	-0.404324	0.00207367
MED21	1.9136	0.00210248
RBM7	5.60233	0.00212749
RING1	0.311999	0.00219708
KAT6B	-3.44096	0.00220501
LLPH	-0.206594	0.0022247
POLE4	2.93833	0.00224179
DHX36	0.255669	0.0022516
LYAR	-0.113882	0.00246631
DDX50	-0.485348	0.00247034
TLX3	1.07705	0.00250066
NFYC	0.233536	0.00252455
MEAF6	-1.23363	0.00263366
NOL6	-0.71017	0.00274874
ZNF317	1.15349	0.00283221
HMG20B	0.411368	0.00283381
PELP1	-0.403709	0.0028922
SNRPB	0.588113	0.00293453
ERGIC1	0.521576	0.00300168
TSPYL1	-0.463001	0.00307533
DPY30	-0.674031	0.00317286
SF3B4	0.5671	0.00320462
NSUN5	0.315775	0.00320902
DNAJC8	0.441509	0.00326883
EXOSC2	0.558687	0.00331263
GRB2	4.04149	0.0033165
SF3B3	0.477405	0.00342794
FBL	-0.157513	0.00352778
RBPJ	0.511397	0.00356094
RBM10	-0.38924	0.00358337
CCAR1	0.250366	0.00362924
UTP6	1.72508	0.00363038
DIDO1	0.593041	0.00366307
EXOSC9	0.585105	0.00388379
MLF2	1.66684	0.00402473
RRN3	1.3263	0.00405366
SRFBP1	-0.541046	0.00408864
C17orf49	0.451782	0.00412055
ZNF207	0.392728	0.00413812
FIP1L1	0.310764	0.00418614
SUMO2	3.62789	0.00422592
CFAP20	0.595864	0.00422879
STEEP1	1.55823	0.00433248
HOXA11	1.10189	0.00437085
AATF	-0.281657	0.00439552
TBL3	-0.684559	0.00441957
BCLAF1	0.350964	0.0044904
ORC5	0.584064	0.00451442
MFAP1	0.349889	0.00455787
CPSF6	0.635705	0.00457225
NUCKS1	5.49128	0.00475198
UBE2E2	2.35962	0.00489052
CMSS1	-0.612747	0.00490235
TAF4B	-0.394478	0.00493473
ZMYND11	0.666472	0.00511433
PITX1	0.833437	0.00516764
ZFR	0.315973	0.00518855
ATAD2	-1.49965	0.00521165
LSM11	3.41303	0.00523216
RBM8A	-0.382214	0.00536328
XRCC1	0.137174	0.00540742
CCDC77	-1.10809	0.00547464
MTA1	-0.448753	0.00550307
RBMS2	1.03495	0.00553836
ACSL3	-0.651434	0.00564889
UNG	2.84296	0.00568227
SPIN1	1.82359	0.00570815
ZCCHC9	0.267886	0.00577984
GTF3C2	-0.395126	0.00584172
CSTF1	0.342462	0.00592743
NOP9	-0.729853	0.00594948
ATF4	-1.82503	0.0060349
LSM8	1.11571	0.00612229
NFIA	0.0795474	0.00615657
PRPF38A	0.414939	0.00621454
ZBTB43	0.750803	0.00627911
KLF4	-0.2694	0.00640431
TAF11	0.407574	0.0064992
POP7	-0.272647	0.00652281
SP110	0.599761	0.00662526
C11orf54	-0.891434	0.00668138
FAM50A	1.84644	0.00670179
EWSR1	-0.470243	0.0067633
SCAF11	-0.35978	0.00707417
CDK2	0.71243	0.00710083
HDGFL2	0.521654	0.00711726
S100A4	0.564415	0.0071872
ACP1	2.5436	0.00743125
DR1	-0.2641	0.00754677
BCCIP	1.41374	0.00759925
EED	-0.282628	0.0078164
TXNL4A	1.39837	0.00812328
SMARCA4	-0.399356	0.00814938
CDK2AP1	3.22754	0.00816701
CDCA8	0.281133	0.00820236
NMNAT1	-0.662995	0.00827419
CPSF2	0.381622	0.00829064
SGO1	-0.563244	0.0083284
TBL1X	0.839622	0.00841676
SNRPC	0.507705	0.00857875
SNRNP70	0.280331	0.00862266
CCNC	1.64409	0.00869297
PIAS4	1.9579	0.00877462
ELF1	0.173483	0.00890401
ACIN1	-0.508487	0.00935977
C1orf174	0.498657	0.00942771
DDX39B	0.212401	0.0094486
EXOSC10	-0.309814	0.00950606
THOC2	0.548018	0.00960155
ZNF281	0.453632	0.00964326
SLX9	0.147584	0.00964458
MED11	1.08136	0.00965857
ZNF800	-0.95567	0.00968256
ZNF174	-0.401572	0.00972278
PPHLN1	0.467187	0.00979649
PAXX	0.30346	0.00992939
MAU2	2.55686	0.00994643
INO80E	0.554814	0.0102816
POLR1H	3.68388	0.010516
FOXK2	0.327514	0.0107409
NUP35	0.546001	0.0107491
RBM34	0.135399	0.0108592
USP42	-0.394254	0.0108604
MED31	0.791504	0.0108611
HMG20A	0.714139	0.0112382
CEBPD	0.647468	0.0114428
MYC	0.147937	0.0114797
EFTUD2	0.146247	0.0116422
RSBN1	0.361089	0.0119292
RCL1	-0.0713193	0.012043
STEAP4	0.478653	0.012124
CD70	0.885219	0.0121665
KPNA1	0.423332	0.0122794
WDR5B	-1.39027	0.0123779
RNF2	0.252162	0.0124648
RSL24D1	-0.188085	0.0127786
C1D	-1.7179	0.0128482
CENPW	0.52446	0.0128608
MRTO4	-0.370134	0.0131066
DDX47	0.208013	0.0131734
NOL11	1.6416	0.0131827
UBP1	0.580389	0.0133157
BOP1	-0.624442	0.0134932
HELLS	1.29091	0.0135705
BCL7B	2.22428	0.0141061
ANP32A	1.13576	0.0141753
CD2BP2	-0.588922	0.014176
RAD50	-0.54942	0.014381
GNL3	-0.074752	0.0147649
PSIP1	-0.157896	0.0147752
ELF2	0.570474	0.014816
PPP1R10	-0.276257	0.0148565
CREB5	-0.178882	0.0152883
POLR1F	0.288413	0.0158696
ARID4A	4.65662	0.0158932
NUP54	-0.521522	0.0163592
COPS8	2.51562	0.0164767
ERCC3	-1.41489	0.0173716
TADA3	-1.06274	0.0174644
SAFB	-0.382793	0.0175793
LSM3	0.94281	0.0175925
RBM19	-0.37232	0.0177955
NUF2	3.1397	0.017883
FLYWCH2	-0.38835	0.0179258
CWC15	1.7626	0.0181805
MED7	2.48819	0.0185345
AKAP8	-1.28457	0.0189576
SIRT6	0.695351	0.018985
JDP2	-0.359107	0.0191191
ZC3H18	0.772039	0.0192131
RITA1	0.919346	0.0194948
CWC25	0.370561	0.0195884
WDR3	-0.614424	0.0198323
FARSB	0.311064	0.0198704
CPSF4	0.431131	0.0203884
ZNF320	1.05825	0.0206689
NAP1L4	0.777283	0.0207736
SMARCB1	0.423245	0.0208874
THYN1	0.303381	0.021069
HAT1	3.47336	0.0211858
SMARCC1	0.219935	0.0215742
MED15	1.13766	0.0216604
RAI1	1.22364	0.0219479
PPIG	2.70255	0.0221431
PHF8	-0.335571	0.0225057
PRKAA1	3.0825	0.0225124
TADA1	0.233928	0.0225723
POM121	-0.275195	0.0226216
PRMT1	0.352163	0.0227245
DDX51	-0.158103	0.0229943
WDR36	-0.563004	0.0234587
PTBP2	2.31323	0.0240495
CDK9	0.323331	0.024358
NCBP2	0.835151	0.0248943
ZNF384	-0.506762	0.0250177
RIOX2	-0.935036	0.0251269
MLH1	1.18724	0.0260739
CDCA7L	0.485961	0.0262667
GSK3A	1.64727	0.0265965
NRM	0.387549	0.0269392
PHC3	-0.497168	0.0269788
SART1	-0.341871	0.0272916
NKX2-5	-0.309479	0.0273977
CAPG	1.84259	0.0274518
ERH	-0.10513	0.0276213
SF3B6	0.474062	0.0291221
GAR1	-0.0698479	0.0298721
EXOSC1	0.38567	0.0299337
LUC7L3	0.42627	0.0299543
CYSRT1	2.12971	0.0299818
TGIF2	2.74757	0.0300118
SNAI1	0.592538	0.0300892
ZSCAN5A	1.01184	0.0313828
NUP88	-0.432384	0.0314112
WBP11	-0.239538	0.0314825
MPHOSPH8	0.592409	0.0315265
SNRNP200	0.267816	0.0319254
TENM3	-0.943052	0.0320735
ADNP	0.651442	0.0326671
TP53BP1	1.94735	0.0332176
ZFC3H1	-1.05495	0.0334891
CSTF3	0.364868	0.0339195
SRSF11	1.09194	0.0340458
RBMXL1	1.04895	0.0346135
MKI67	0.105393	0.0352546
CDC27	0.354091	0.0357247
CTBP1	0.341442	0.0363334
RAD23A	-0.322644	0.0363767
SAFB2	-0.235442	0.0371605
E2F3	-0.644584	0.0379219
MGST3	-0.200987	0.038503
PARN	-0.828475	0.0394333
PHAX	3.90961	0.0398456
UCK2	2.59984	0.0402374
KPNB1	0.168635	0.0408979
LYRM4	0.433047	0.0416637
GTF2H1	-0.613331	0.041905
RBM14	0.0545578	0.04241
SH3BGRL3	0.785202	0.0429191
CTNNBL1	0.63069	0.0430229
NIP7	-0.3583	0.043101
RAB8A	0.77797	0.0431357
ZNF639	1.13458	0.0432535
KPNA4	-0.252695	0.043353
MED18	1.67771	0.0434325
ZNF524	-0.456605	0.0436027
RFXANK	1.70079	0.0438068
USP48	-1.3417	0.0441763
UBN2	-1.24112	0.0448914
KMT2B	0.433023	0.0452281
MSL3	-0.685281	0.0455594
FBXO28	1.29023	0.0457712
SMARCA1	-0.658271	0.0461688
EHMT2	0.704871	0.0465017
POLR2G	0.628504	0.0473856
LEMD2	0.141884	0.0475325
AQR	0.910513	0.0478273
RPP40	0.278881	0.0482937
NAMPT	1.39729	0.0493751
DNTTIP2	-0.118413	0.0497761
TERF2IP	-0.70622	0.0498118
EXOSC3	0.265469	0.0499105
KHDRBS1	0.174374	0.050414
CSE1L	-0.578816	0.0507879
MYO1C	-0.709852	0.0508871
UBE2A	2.53299	0.0511161
PSMB2	-0.272258	0.0513711
PRPF3	-0.124233	0.051553
PSMA1	-0.579442	0.0519548
ELF4	-1.3978	0.0520062
MDC1	0.240016	0.0521024
NUP107	-0.247154	0.052587
TADA2B	0.170734	0.0530022
DNPH1	1.56655	0.0533303
PCGF5	1.34022	0.0533816
RPP30	-0.239981	0.0535475
BCL2L2	1.94658	0.054571
RANGAP1	-0.136845	0.0548201
NEK7	1.40044	0.0551571
GTF3C1	0.380185	0.0560551
PAF1	0.45878	0.056243
SIN3A	0.337234	0.0574484
SENP1	0.107353	0.0575338
USP3	0.230899	0.0576739
LIN37	1.55422	0.0585116
ZBTB9	0.26927	0.0596198
PIN4	0.882318	0.0601506
MCM5	-0.244027	0.0618095
SF3B2	-0.342384	0.0623323
SCAF1	-0.580078	0.0629557
NOL8	-0.228055	0.0643136
ANXA5	0.49679	0.0644237
CBX3	0.414444	0.0658361
SKP1	0.28538	0.0674503
GTF2I	0.0926917	0.0679977
ZRANB2	-0.889976	0.0681246
CHAF1B	0.328716	0.0682528
COPS4	0.678333	0.0686049
YEATS2	0.558303	0.0687286
HEATR1	-0.454053	0.0692399
DUSP3	5.04834	0.0693306
PBX1	0.538296	0.0694893
NKAP	-0.17475	0.0695758
WDR55	-1.53494	0.0707927
NLE1	-0.464071	0.0715374
MED17	0.557734	0.0717706
NUFIP1	0.504784	0.0726732
DMAP1	0.293594	0.0732427
LBR	-0.139904	0.0734847
NAIF1	-0.701374	0.0739429
DIS3	-0.42252	0.0745447
NUP155	0.720641	0.07472
RPF2	0.186547	0.074927
AMZ2	0.875774	0.0758528
BOD1L1	1.79274	0.0764881
DDX20	-1.16542	0.07796
PHF20	1.30564	0.0783415
MRE11	-0.101843	0.0791369
OARD1	0.886865	0.0795523
UBE2N	0.372152	0.0795712
MED29	0.905988	0.0796498
YEATS4	0.517291	0.0801223
COPS3	0.71327	0.0811746
SRSF5	-0.368376	0.0815669
WDR25	1.06845	0.0815845
CREM	0.630572	0.0820807
KMT5A	-0.866963	0.0821134
PSPC1	-0.186021	0.0826186
CLK1	0.847427	0.0829594
XRCC4	1.83672	0.0836176
UBFD1	1.44996	0.0836805
KRI1	-0.725112	0.0842738
CEBPZOS	-0.528089	0.0853732
BRD3	-0.312103	0.0858354
TSR1	0.29734	0.0859365
MED6	2.52889	0.0863147
PPIL3	0.421892	0.0877424
PSMD7	0.852299	0.0900433
ETS1	1.23333	0.0910131
NFE2L2	-0.806697	0.0911654
ZNF592	-0.368228	0.09138
DCUN1D1	1.50494	0.0922938
TAF13	0.546524	0.0928071
KDM5A	-1.17897	0.0932501
CUL4B	0.0876558	0.0933591
SSB	0.525888	0.0943869
MED27	0.433004	0.0950242
RSBN1L	-0.157781	0.0953213
APEX1	-0.174821	0.0953944
CENPF	0.975566	0.0954177
ORC6	0.472926	0.0954527
PRPF8	0.208486	0.0957357
MYBBP1A	-0.0310991	0.096393
RAD21	0.229361	0.0964126
DHX8	0.46158	0.0968443
NUP133	-1.98681	0.0970559
COPS5	1.51169	0.0982378
TBP	-0.130039	0.0982643
KDM2B	0.184387	0.0989554
NSUN2	0.252092	0.0996095
MED14	1.28159	0.102475
TPR	0.909936	0.102497
SP100	-0.31325	0.104202
KNL1	-1.05205	0.107645
CBX6	-0.658427	0.108567
ZC3H11A	-0.192104	0.108881
INTS13	-0.293881	0.108963
ZNF687	-0.295864	0.10992
PHF20L1	-0.430887	0.10995
PSMC3IP	1.3051	0.110404
RAVER1	-0.0985761	0.111188
NABP2	1.58207	0.111954
MBD2	-0.340195	0.112865
POLR3D	-0.295696	0.112994
TOE1	0.329466	0.113
MCM10	-0.325061	0.114329
ZC3H8	-0.443273	0.115751
AKAP8L	-0.574137	0.116222
NFKBIL1	-0.31266	0.117478
HDAC2	0.170784	0.117823
PPARG	0.518577	0.118082
NCBP3	-0.535711	0.118228
TFAP2C	0.157941	0.119895
MED10	0.840317	0.120747
HNRNPUL1	-0.251099	0.122236
HDAC3	0.579236	0.124452
DNAJB4	0.968201	0.124786
FOXC2	-0.172857	0.125053
WRN	0.308884	0.125258
CDK8	0.543172	0.1256
U2AF2	-0.215454	0.126007
RDH14	-0.345772	0.126085
C12orf43	0.151799	0.126194
PDXK	1.24775	0.126837
PSMD13	-0.734616	0.126875
SAP30BP	-0.573824	0.127326
QKI	0.373283	0.129352
PHC2	-0.2611	0.130649
PSMG2	2.71008	0.130649
SYF2	3.718	0.130787
NFE2L1	0.621837	0.131745
RBFOX2	-0.153095	0.131778
TRAF4	-1.45622	0.132269
SELENBP1	-0.328303	0.134025
ALX4	0.837569	0.136237
ASF1A	0.636837	0.136798
LEMD3	1.15543	0.137496
ETS2	0.775374	0.140048
NFIX	-0.505712	0.140325
AHCTF1	0.0617488	0.141134
ZSCAN26	-0.531183	0.142184
CDK7	-0.321836	0.142217
POU2F1	0.256632	0.145216
GTF2A1	-0.352863	0.145305
DUSP23	0.619738	0.145339
NR4A2	0.309748	0.145611
SMARCD2	-0.340839	0.147211
TBL1XR1	0.255068	0.14766
NAXE	-0.959246	0.148107
ZNF146	-0.182076	0.150025
SUPT20H	-0.146616	0.150566
HMGN5	-0.516976	0.152143
HASPIN	-0.374185	0.155008
INTS9	3.8452	0.155153
SMNDC1	0.24398	0.156403
CTBP2	-0.331921	0.156463
ZFP41	-0.460058	0.157806
SF3A1	0.131781	0.159213
PNN	-0.350136	0.160415
CENPI	-0.394043	0.161133
SEC11A	0.224893	0.161488
CHD4	0.229681	0.163262
SUPT7L	-0.179551	0.164306
FANCF	0.821031	0.165983
LIN9	0.522471	0.167954
SPEN	-0.323191	0.168285
RBM42	0.232094	0.168911
TKT	-0.192952	0.169083
FOXC1	0.152125	0.170844
TAF5	0.0701005	0.17115
TAF15	0.350322	0.174022
HEATR3	1.48702	0.174762
PHF2	-0.29363	0.175276
RPP38	-0.0572723	0.176255
STK35	-0.807763	0.177023
FAF1	-1.48039	0.180297
C19orf47	0.162608	0.180502
DDA1	1.07459	0.18128
ENSA	2.02967	0.182887
NFRKB	0.485078	0.182961
PPP1CB	0.103064	0.183271
GTF2A2	-0.655252	0.183853
NOP16	0.0448006	0.184157
NUP42	0.344673	0.185107
DCAKD	-0.498675	0.185306
NUFIP2	0.852466	0.186514
PRPF6	-0.0854249	0.18833
RAD51AP1	0.582699	0.188619
CSTF2	0.126246	0.18881
GTF3C4	0.153214	0.189893
TAX1BP3	-1.80298	0.193196
WDR74	-0.239261	0.193198
PLRG1	0.242874	0.194931
SRRT	-0.177898	0.196622
MIDEAS	0.5432	0.198822
FANCD2	0.878938	0.199263
XRN2	-0.10103	0.199847
LEO1	-0.381776	0.201026
SIRT7	-0.141834	0.201494
THOC1	-0.140175	0.204151
PSMD3	0.138639	0.205028
CCDC59	-0.0471506	0.205794
CHD3	-0.621261	0.205958
ANP32B	0.318607	0.206693
POLR2C	0.473444	0.207258
THOC5	0.233434	0.207801
MED8	0.959186	0.211306
VRK1	0.14224	0.217824
INO80	-0.422162	0.219759
MACROH2A1	-0.137523	0.222549
FOXL2	0.21824	0.22415
ZNF664	0.157744	0.22549
MBTD1	1.1397	0.22687
UTP20	0.0630706	0.227398
DEF6	-2.78169	0.227515
CDC40	0.377884	0.227671
WAPL	-0.873296	0.227844
DLST	-1.37915	0.229111
ZGPAT	0.778309	0.229395
BAG1	-0.603381	0.23156
EYA1	-0.424021	0.231682
RBM26	-0.288884	0.231687
NUP43	-0.344667	0.234261
CUL1	0.120903	0.234996
MSL1	0.918619	0.236779
OGG1	-0.245882	0.237461
SLC3A2	0.207262	0.237587
BPNT1	-1.53846	0.238031
GPS1	0.513742	0.239139
INTS15	-4.51954	0.243342
MBD4	0.0864208	0.246865
SRCAP	1.21715	0.248759
ZMYM3	-0.778576	0.249333
INTS5	1.70411	0.252227
LRRC47	0.431552	0.252709
CCDC127	0.214458	0.255693
KMT2A	-0.0363999	0.25717
ZNF593	0.0446187	0.257235
PEX3	0.476977	0.259862
NFAT5	0.323287	0.2609
SRRM2	0.0701591	0.261426
BMI1	-0.636792	0.262023
ZBTB7B	0.38924	0.263303
BCORL1	0.497899	0.266693
PARP2	0.144539	0.267385
ARIH1	-1.09678	0.269881
CTDSPL2	2.60815	0.27023
NUP188	0.859535	0.270671
DNMT1	0.103809	0.272541
SET	0.168635	0.27402
SLU7	-0.265776	0.275169
PRR14	0.328999	0.275585
RPP25	0.111574	0.275588
KAT8	-0.444713	0.276127
GTF3C3	-0.0841286	0.277556
MRGBP	-0.301849	0.280335
ZBED6	-0.24553	0.281292
PHIP	-0.397404	0.28222
XPO1	0.119958	0.283581
TOX4	-0.146904	0.287074
SMCHD1	0.538901	0.287773
POLR3E	0.616432	0.288641
RNPS1	0.107213	0.289133
IRF2	-0.345354	0.290345
PRPF31	-0.382888	0.293066
RCOR3	0.143228	0.293198
INO80B	-0.156464	0.293979
GEMIN2	0.327053	0.294408
HMGA2	-0.325902	0.296115
MED22	0.435088	0.297918
RBM15B	-0.512293	0.300696
ATP6V1C1	-1.08156	0.301428
RUNX3	0.131782	0.304855
SNRNP40	0.164838	0.306481
UTP4	1.31604	0.3071
DDX1	0.137119	0.30763
FOXP4	0.18141	0.308902
THOC3	-0.184644	0.310555
USP22	0.401108	0.310558
RPIA	0.386192	0.311753
RNMT	0.417773	0.312683
REST	0.229045	0.31407
SF3B1	0.131551	0.318479
CLK3	-1.00194	0.319056
HIRA	0.171217	0.319644
ARL6IP6	-0.176376	0.320432
FAM98B	-0.284479	0.323372
XRCC5	0.0211156	0.32405
PRDM10	-0.239345	0.324088
SNIP1	0.504235	0.325387
RPP25L	0.76958	0.326695
EIF3L	-1.34686	0.327215
FKBP5	4.61096	0.327443
TCF12	-0.586763	0.328133
TPX2	-0.110598	0.329419
GTF2H3	-0.585182	0.330674
FUS	-0.087698	0.332406
REPIN1	-0.0993643	0.333754
SETD1A	0.71876	0.337937
ATAD1	6.10262	0.338003
NOSIP	-1.18237	0.339311
PGLS	0.462164	0.339323
JMJD6	-0.879918	0.339954
CBX5	-0.168824	0.340995
THAP3	-0.138773	0.341064
TRIR	-0.123256	0.344191
ZBTB48	0.225075	0.347721
DHX40	0.605631	0.348809
IPO8	-0.281312	0.353773
PGAM1	-0.220843	0.35379
BPTF	0.225222	0.353914
EP400	0.906102	0.355425
CSNK2A1	-0.171827	0.35974
NXT1	-0.614985	0.360214
PWP2	-0.327062	0.36326
TERF2	-0.173891	0.370282
SMC3	-0.423778	0.371742
SLC1A3	1.03158	0.371805
COPS7A	0.563056	0.372053
SMARCD1	0.118378	0.372159
HNRNPLL	0.346441	0.374248
TAF3	-0.101525	0.375342
INTS4	-0.245597	0.375749
OGT	0.0554847	0.3774
INO80C	-0.156386	0.378243
MED19	0.520694	0.37866
BACH1	0.171389	0.387356
EMD	0.0545118	0.388034
AUP1	0.264565	0.388964
OGFOD3	-0.939269	0.391347
MYPN	-0.366478	0.392733
ARL6IP4	-1.05884	0.392964
TFPT	0.193482	0.394239
UBE2I	0.195287	0.396352
C7orf50	-0.151565	0.397219
MGMT	-0.0797065	0.397301
MTREX	-0.0717805	0.397454
SCAF4	-0.349368	0.401494
TRPS1	-0.109457	0.409414
ALDOC	1.13203	0.411495
PPWD1	0.75042	0.412152
MORF4L2	0.0992419	0.415927
CCDC12	0.965312	0.417897
PNO1	0.118435	0.420387
SON	0.0735361	0.421228
ANAPC10	0.401664	0.42169
SEC13	-0.110277	0.423976
BRD9	0.2431	0.42399
HDGFL3	0.392915	0.428747
NOP53	-0.0273689	0.429019
PSMB7	-0.5257	0.42941
ANLN	0.126658	0.432015
MBD3	0.22258	0.432371
SUN1	0.341619	0.433963
BRMS1L	0.64802	0.433984
PDS5A	0.0991396	0.435177
EPC1	0.61842	0.435704
RMI1	-0.195761	0.436901
POLR2I	-1.00606	0.442519
CCNH	-0.881546	0.447598
NSL1	0.77075	0.448405
KAT5	-0.490543	0.448621
ZC3HC1	0.72401	0.454839
MED25	0.649651	0.456735
PRPF4	0.0278001	0.457654
PTMS	-0.288446	0.461278
PCYT1A	0.259341	0.462783
MAGOH	0.466221	0.464822
SAP130	0.472679	0.465454
SMARCE1	0.140147	0.466204
ZFP64	0.075258	0.468061
POGZ	1.12598	0.469973
TRIP13	0.2947	0.471127
TNPO1	-0.181444	0.472041
GET3	0.708124	0.472193
PHF21A	-0.151773	0.473206
IPO5	-0.142398	0.479103
YTHDC1	-0.0635332	0.481872
BCL7C	0.10513	0.488108
UBE2E1	0.297528	0.489009
C19orf53	0.0450777	0.490063
MTF2	-0.183237	0.490136
POLR1G	-0.135968	0.490905
STAG2	-0.831702	0.497252
PPP1R7	-0.534355	0.498618
UTP23	-0.0468959	0.501567
KIF23	0.167252	0.502169
EXOSC7	-0.0704083	0.503569
CPS1	-0.227622	0.51112
SLTM	0.0447278	0.513137
CDIPT	0.239371	0.514431
SAP18	0.0563075	0.515754
FBXL18	0.377993	0.515948
RUNX2	-0.0723093	0.516112
NELFB	-0.536005	0.516529
CBX4	-0.0529988	0.517032
KDM1B	0.0504831	0.520641
MCRS1	-0.124683	0.523037
GTF2F2	-0.507281	0.526487
PRPF40A	0.370582	0.528106
BUD23	-0.331627	0.528748
SYMPK	0.230349	0.532332
PIN1	-0.653766	0.533709
MTA3	0.0942743	0.534722
STAMBP	-0.659254	0.539509
KIF22	-0.03247	0.540288
SUN2	-0.0844189	0.541514
STK26	-0.888211	0.542316
MGA	-0.0968992	0.54666
RNGTT	0.269243	0.548152
POLR3K	0.10098	0.549459
VRK3	0.264594	0.552409
AAAS	-0.752805	0.552958
LIG3	-0.0155968	0.553819
CHAMP1	-0.256943	0.554427
CHAF1A	0.0991255	0.555604
ARNT	0.0956738	0.557923
WDR13	-1.23288	0.559641
DDX39A	0.105805	0.575195
PRDM1	0.253091	0.576009
SMARCD3	-0.647723	0.576215
UBA1	0.271469	0.577071
WDR82	0.0484441	0.577251
MCM4	0.137859	0.584595
RCOR1	-0.0401962	0.587719
TBRG1	0.138632	0.588641
TEAD4	0.515877	0.590259
TRIM27	-0.292804	0.590945
RBM15	0.0645668	0.591275
GTF2B	0.268437	0.592512
C2orf49	-0.393319	0.592829
UGDH	0.180076	0.596932
MED12	-0.566966	0.597305
VPS72	-0.120951	0.603394
UPF3A	-0.167296	0.606278
ZNF638	-0.0442875	0.606726
TFCP2	0.120338	0.609253
ASXL2	0.0924705	0.614865
NXF1	-0.0337167	0.618863
GABPB1	0.14238	0.620245
RBM27	0.112932	0.624432
APOC3	-0.138642	0.624803
CTR9	-0.125438	0.625656
KANSL1	-0.62863	0.626065
KAT7	0.176971	0.626556
MAT2A	-0.205196	0.627465
CCAR2	-0.031354	0.632835
TOP1	0.00668619	0.632871
CDCA5	0.0657178	0.63347
FANCL	0.437917	0.633827
COPS6	0.346751	0.642925
TRRAP	0.0779153	0.643526
NFYA	-0.0696224	0.6475
CXXC1	0.0748024	0.650123
BRD8	-0.351067	0.650745
ORC4	-0.102036	0.651479
ISG20L2	-0.0222417	0.654375
TCEA1	0.1821	0.655225
YAF2	-0.099325	0.656411
PGP	-0.430969	0.65755
PSME3	-0.556304	0.658741
INTS1	0.155474	0.659179
SNRNP48	-0.414404	0.659235
TAF1	-0.0378015	0.660027
KCTD1	0.107135	0.660034
AHDC1	0.167295	0.663359
RANBP2	0.0736252	0.66498
PMM2	-0.297081	0.668642
SUPT3H	0.0607194	0.67364
CMPK1	-0.299154	0.675376
UBR5	-0.211549	0.675826
DCAF13	0.033002	0.678161
NUP62	0.287679	0.680968
PPP1R8	0.204362	0.682023
CDKN2AIP	-0.264742	0.682456
GPKOW	0.302839	0.690998
SNRNP27	-0.411833	0.693302
POP5	-0.0520523	0.699606
IRF1	-0.0716526	0.702193
WDR33	0.210075	0.707424
ZNF346	0.0296977	0.718204
CRIP2	-0.0593539	0.720936
GTF2H2	0.183109	0.722023
PSMD4	0.184915	0.722546
IFI16	0.0137428	0.722781
ZMYND8	-0.0539933	0.728439
ISY1	-0.132858	0.731796
DDX19A	-0.138336	0.736929
ARID2	0.0866267	0.749354
FBXO11	-0.0584962	0.758246
U2SURP	-0.167289	0.761375
PDS5B	0.2516	0.76143
INTS7	0.137595	0.768556
RAD18	0.0348216	0.773891
ANXA11	0.164332	0.775681
SGF29	0.0268966	0.781714
JRKL	-0.0304271	0.783835
TOP2B	0.0379059	0.787217
DCAF7	-0.134037	0.78752
ANP32E	-0.140026	0.792387
SUGP1	-0.120317	0.798272
EHMT1	-0.0743733	0.800319
ZFP91	0.0186182	0.805953
PPIE	0.0962858	0.807431
IWS1	-0.0912053	0.809816
ORC2	-0.0989348	0.812143
ORC3	0.103384	0.823218
AFG2B	-0.0918584	0.824135
ATF2	0.0542784	0.82512
VIRMA	-0.130009	0.826421
GLI3	-0.107292	0.828228
ELOA	0.0668092	0.832619
URB2	-0.0630815	0.832885
WIZ	-0.0199033	0.835692
POLR1B	-0.0229007	0.843163
ZKSCAN8	0.0926368	0.844943
SMARCC2	-0.0690227	0.847805
PSMD14	-0.0391481	0.847832
GTF2H4	0.0218415	0.854384
HNRNPD	0.00570876	0.855003
STXBP3	0.161319	0.855618
NBN	0.0198732	0.861819
HMGXB4	0.0800234	0.863181
PRCC	0.0693343	0.863233
NUP85	0.031907	0.869651
CBLL1	0.0936806	0.871626
DPF2	-0.0314238	0.871694
YBEY	-0.0492539	0.872983
POLR3F	0.0489764	0.877473
ZC3H13	0.117344	0.88433
DNAJB1	-0.0314862	0.886164
TCERG1	0.0181078	0.88672
NFYB	-0.0121082	0.888675
LENG8	-0.0374143	0.892136
POLR2B	0.0217951	0.896708
PHF10	-0.0376251	0.897684
RPUSD3	-0.063585	0.899894
RFX1	-0.0276163	0.902804
RFX5	-0.0404521	0.905225
SP1	0.0225281	0.905956
TFIP11	0.0193909	0.905978
EXOSC5	0.0241954	0.911483
PPM1D	-0.0325435	0.913182
HCFC2	0.0260772	0.916711
DNAJC17	0.0697721	0.917826
TAF6L	0.0108328	0.919105
CCNK	-0.0247397	0.919491
BICRAL	-0.020265	0.92273
CIRBP	0.00847943	0.924957
CPSF1	-0.0327274	0.92683
BCOR	-0.0130486	0.929175
BAP1	0.0106259	0.931118
URB1	-0.0350438	0.931154
RPRD2	0.0809504	0.932873
LSM7	0.0399261	0.934771
EPOP	0.0437406	0.935834
ZNF24	-0.0147202	0.937791
SMS	0.0382804	0.937999
GATAD1	0.0170079	0.938791
MORF4L1	-0.00768275	0.944169
RBM17	-0.0135627	0.951338
PAXBP1	-0.0394229	0.951612
ZHX2	-0.0797214	0.95842
PHF3	-0.0282956	0.961131
TMEM209	-0.00739473	0.961701
POLR1A	0.00827724	0.963503
LSM2	0.0199354	0.966115
XAB2	-0.00744091	0.966702
CBR1	-0.0143073	0.967488
IMP4	0.00318654	0.970076
DNAJC25	-0.00899485	0.974376
CWF19L2	0.00961944	0.974841
NUP37	0.00620363	0.977763
SPAST	0.0357766	0.979152
HOXC10	0.00937151	0.979291
TOR1AIP1	-0.00181821	0.980486
C8orf33	-0.00309022	0.982547
MED16	-0.0119883	0.982655
ZNF623	0.0183122	0.983244
TRMT1L	-0.0101639	0.984946
NUP50	-0.00219667	0.986334
EMSY	0.0126401	0.98816
MED30	0.00406571	0.990918
CENPQ	-0.00184303	0.996813
MED23	-0.00191445	0.997401
PBRM1	-0.000483914	0.998292
MAD2L1	-0.00153953	0.998858
GLE1	-0.000256173	0.999019

## Sheet: S5
Input-The O-GlcNAc Database	sWGA-The O-GlcNAc Database
AAAS	AAAS
AARS1	AATF
AATF	ABCB10
ABCB10	ABCC1
ABCF2	ABCF2
ABHD12	ABHD12
ABI2	ACAA2
ABLIM1	ACAD9
ABLIM2	ACADM
ABRAXAS2	ACADVL
ACAA2	ACAT1
ACAD9	ACIN1
ACADM	ACSL4
ACADVL	ACTA1
ACAT1	ACTA2
ACAT2	ACTB
ACIN1	ACTG1
ACLY	ACTL6A
ACOT1	ACTN1
ACOT7	ACTN4
ACOX1	ACTR1A
ACSF3	ACTR2
ACSL4	ADAM10
ACTA1	ADAM9
ACTA2	ADAR
ACTB	ADGRE5
ACTG1	ADNP
ACTL6A	ADRM1
ACTN1	AGFG1
ACTN4	AGPS
ACTR1A	AGRN
ACTR1B	AHCTF1
ACTR2	AHCY
ADAM10	AHNAK
ADAM9	AIFM1
ADAR	AIFM2
ADD2	AIMP1
ADGRE5	AK2
ADNP	AKAP8
ADRM1	AKR1B1
ADSS2	ALB
AGFG1	ALDH7A1
AGFG2	ALDOA
AGPS	ALKBH2
AHCTF1	ANAPC1
AHCY	ANKRD17
AHNAK	ANLN
AIFM1	ANXA2
AIFM2	ANXA5
AIMP1	ANXA6
AK2	AP2A1
AK3	APEX1
AKAP8	APMAP
AKR1B1	APOD
ALB	APTX
ALDH2	AQR
ALDH7A1	ARCN1
ALDOA	ARF3
ALKBH2	ARF4
ALPL	ARGLU1
ALX4	ARID2
ANAPC1	ARID5B
ANKRD17	ARNT
ANLN	ARPC5
ANXA2	ARPC5L
ANXA5	ASAH1
ANXA6	ASPH
AP1M1	ASXL2
AP2A1	ATAD5
AP2B1	ATF1
APEX1	ATF6
APMAP	ATF7
APOD	ATM
APP	ATP13A1
APTX	ATP1A1
AQR	ATP1B1
ARCN1	ATP1B3
ARF3	ATP5F1A
ARF4	ATP5F1B
ARFGAP1	ATP5ME
ARFGAP2	ATP6AP1
ARFGAP3	ATP6V0A2
ARGLU1	ATP6V0C
ARHGAP11A	ATP6V1A
ARHGEF2	ATP6V1E1
ARID2	ATXN1
ARID5B	ATXN1L
ARL6IP4	ATXN2L
ARNT	ATXN7
ARPC5	B2M
ARPC5L	BAG2
ASAH1	BASP1
ASPH	BBX
ASXL2	BCAS2
ATAD5	BCLAF1
ATF1	BCOR
ATF2	BCORL1
ATF6	BICRAL
ATF7	BMAL1
ATG12	BMI1
ATIC	BMS1
ATP13A1	BOD1L1
ATP1A1	BPTF
ATP1B1	BRD3
ATP1B3	BRD8
ATP5F1A	BRIX1
ATP5F1B	BSG
ATP5ME	BSN
ATP6AP1	BST2
ATP6V0A2	BUB3
ATP6V0C	BUD23
ATP6V1A	BZW2
ATP6V1E1	C11orf54
ATPAF2	C17orf49
ATXN2L	C1orf131
ATXN7	C1QBP
AURKAIP1	C8orf33
B2M	CABIN1
BAG2	CACYBP
BASP1	CALD1
BBX	CALR
BCAP29	CALU
BCAS2	CAND1
BCCIP	CANX
BCL7B	CAP1
BCLAF1	CAPNS1
BCOR	CAPRIN1
BIN1	CAPZA1
BMAL1	CAPZB
BMI1	CAT
BMP2K	CAVIN1
BMS1	CBFB
BOD1L1	CBLL1
BPNT1	CBX2
BPTF	CCAR1
BRAP	CCNK
BRD2	CCNT1
BRD3	CCT4
BRD8	CCT6A
BRF2	CCT8
BRIX1	CD109
BSG	CD2BP2
BST2	CD36
BUB3	CD46
BUD23	CD47
BZW2	CD58
C11orf54	CD9
C15orf40	CDC23
C17orf49	CDC27
C1orf131	CDC42BPA
C1QBP	CDC5L
C8orf33	CDC73
CABIN1	CDK8
CACUL1	CDKN2AIP
CACYBP	CDV3
CAD	CELF1
CALD1	CENPC
CALR	CENPF
CALU	CENPV
CAND1	CERS2
CANX	CFL1
CAP1	CHAMP1
CAPNS1	CHCHD3
CAPRIN1	CHD3
CAPZA1	CHD4
CAPZB	CHERP
CARNMT1	CHST14
CARS1	CHTOP
CAT	CKAP2
CAVIN1	CKAP4
CBFB	CKAP5
CBLL1	CKMT1B
CBX2	CLASP1
CCAR1	CLIC1
CCDC50	CLINT1
CCM2	CLOCK
CCNE2	CLPTM1L
CCNK	CLPX
CCNT1	CLTC
CCT4	CLU
CCT6A	CMPK1
CCT8	CMSS1
CD109	CNN2
CD2AP	CNOT1
CD2BP2	COPA
CD36	COPB2
CD46	COPS2
CD47	CORO1B
CD58	COX11
CD9	CPNE1
CDC23	CPNE3
CDC27	CPS1
CDC37	CPSF2
CDC42BPA	CPSF7
CDC42EP4	CPT1A
CDC5L	CPVL
CDC73	CREB1
CDK2AP1	CRIP2
CDK5	CRTAP
CDK8	CSDE1
CDKN2AIP	CSNK2A1
CDV3	CSNK2A2
CELF1	CSPG4
CENPC	CSRP1
CENPF	CSTB
CENPU	CSTF2
CENPV	CTNNA1
CEP41	CTNNBL1
CEP44	CTSB
CERS2	CTSD
CFL1	CUL4A
CHAMP1	CUL4B
CHCHD3	CXADR
CHD3	CXXC5
CHD4	CYB5R1
CHEK1	CYB5R3
CHERP	DAG1
CHMP5	DBI
CHST14	DBNL
CHTF8	DDAH2
CHTOP	DDB1
CKAP2	DDX10
CKAP4	DDX17
CKAP5	DDX21
CKMT1B	DDX27
CLASP1	DDX28
CLIC1	DDX3X
CLINT1	DDX42
CLK1	DDX5
CLNS1A	DDX52
CLOCK	DDX55
CLPTM1L	DDX6
CLPX	DECR2
CLTC	DEK
CLU	DHX15
CMPK1	DHX37
CMSS1	DHX8
CMTR1	DHX9
CNN2	DIDO1
CNOT1	DIMT1
CNOT11	DIPK2A
CNOT6L	DLGAP5
CNPY3	DLST
COL27A1	DMAP1
COPA	DNAJC11
COPB2	DNTTIP1
COPS2	DNTTIP2
COPS8	DOCK5
COQ10B	DPP7
COQ6	DPYSL2
CORO1B	DSG1
COX11	DSG2
CPNE1	DSP
CPNE3	DUSP14
CPS1	DYNC1H1
CPSF2	DYNC1I2
CPSF7	DYNC1LI1
CPT1A	DYNC1LI2
CPVL	EBP
CREB1	ECE1
CRELD2	ECHS1
CREM	EEF1A1
CRIP2	EEF1A2
CRKL	EEF1E1
CRLF3	EEF2
CRTAP	EFTUD2
CRYBG1	EGR1
CSDE1	EIF2S1
CSNK2A1	EIF2S3
CSNK2A2	EIF3A
CSPG4	EIF3D
CSRP1	EIF3G
CSTB	EIF3H
CSTF2	EIF4A1
CSTF2T	EIF4A3
CTDSP1	EIF4E
CTH	EIF4G1
CTNNA1	EIF4G2
CTNNBL1	EIF4H
CTSB	EIF5
CTSD	EIF5A
CTSL	EIF6
CTTN	ELF1
CUL4A	ELF2
CUL4B	ELK1
CWC25	ELK3
CXADR	ELOA
CXXC5	EMC2
CYB5R1	EMC8
CYB5R3	EMD
DAG1	EMSY
DAXX	ENO1
DBI	ENSA
DBN1	EP300
DBNL	EP400
DCTN1	EPC1
DDAH2	EPC2
DDB1	EPPK1
DDX10	EPRS1
DDX17	ERLIN1
DDX21	ERLIN2
DDX27	ESCO1
DDX28	ESYT1
DDX3X	ESYT2
DDX42	ETF1
DDX46	ETFB
DDX5	EWSR1
DDX52	EXOSC10
DDX55	EYA3
DDX6	EZH2
DECR2	EZR
DEK	F5
DEPDC7	FAF2
DHX15	FASN
DHX37	FBL
DHX8	FBXL6
DHX9	FDPS
DIDO1	FH
DIMT1	FHL1
DIPK2A	FIP1L1
DLD	FKBP4
DLGAP5	FLNA
DLST	FLNB
DMAP1	FLNC
DNAJC11	FLYWCH2
DNM1L	FOS
DNTTIP1	FOSL2
DNTTIP2	FOXC1
DOCK5	FOXK1
DPH2	FOXK2
DPP7	FOXL2
DPYSL2	FOXP1
DSG1	FOXP4
DSG2	FUBP1
DSP	FUBP3
DST	FUCA1
DTNBP1	FUS
DUSP14	FXR1
DYNC1H1	FXR2
DYNC1I2	G3BP1
DYNC1LI1	G3BP2
DYNC1LI2	GAA
EBP	GABPA
ECE1	GALNT2
ECH1	GANAB
ECHDC1	GAPDH
ECHS1	GATA2
EEF1A1	GATAD2A
EEF1A2	GATAD2B
EEF1E1	GBA1
EEF2	GDF15
EFTUD2	GGH
EIF2B1	GHITM
EIF2S1	GLG1
EIF2S3	GLRX
EIF3A	GLT8D1
EIF3B	GNAI2
EIF3D	GNAI3
EIF3G	GNB1
EIF3H	GNB4
EIF3M	GNL2
EIF4A1	GNL3
EIF4A3	GNS
EIF4B	GOLM1
EIF4E	GOLM2
EIF4G1	GPC1
EIF4G2	GPD2
EIF4H	GPS1
EIF5	GPS2
EIF5A	GPX8
EIF6	GRN
ELF1	GSK3B
ELF2	GSN
ELK1	GSPT1
ELK3	GSTO1
ELMOD2	GTF2F2
ELOA	GTF2I
EMC2	GTF3C1
EMC8	GTPBP4
EMD	H1-10
EMSY	H4C9
ENAH	HADHA
ENO1	HASPIN
ENSA	HBA1
EP300	HBB
EP400	HCFC1
EPC1	HCFC2
EPC2	HDAC1
EPDR1	HDAC2
EPN2	HDGF
EPPK1	HDGFL2
EPRS1	HEATR3
ERLIN1	HIRA
ERLIN2	HIVEP1
ERO1A	HLA-A
ERP44	HLA-C
ESYT1	HMGB1
ESYT2	HMGN5
ETF1	HNRNPA0
ETFB	HNRNPA1
EWSR1	HNRNPA1L2
EXOSC10	HNRNPA2B1
EYA3	HNRNPA3
EZH2	HNRNPAB
EZR	HNRNPC
F5	HNRNPF
FAF2	HNRNPH1
FAM234A	HNRNPH2
FASN	HNRNPH3
FBL	HNRNPK
FBXL6	HNRNPR
FDPS	HNRNPU
FH	HNRNPUL1
FHL1	HNRNPUL2
FIP1L1	HOXA5
FKBP4	HOXC9
FLNA	HP
FLNB	HP1BP3
FLNC	HRAS
FLYWCH2	HSD17B10
FOS	HSD17B11
FOSL2	HSD17B12
FOXC1	HSD17B4
FOXK1	HSP90AB1
FOXK2	HSP90B1
FOXL2	HSPA2
FOXP1	HSPA5
FTH1	HSPA8
FTSJ1	HSPA9
FUBP1	HSPB1
FUBP3	HSPD1
FUCA1	HSPE1
FUS	HSPH1
FXR1	HYOU1
FXR2	ICE1
G3BP1	IDH3A
G3BP2	IGF2R
G6PD	IKBIP
GAA	ILF3
GABPA	IMPDH2
GABPB1	INCENP
GABPB2	ING3
GALK1	INO80
GALNT2	INTS1
GANAB	INTS12
GAPDH	INTS4
GAPVD1	INTS6
GATA2	IPO7
GATAD2A	IQGAP1
GATAD2B	ITGA3
GBA1	ITGA5
GDF15	ITGA6
GEMIN5	ITGAV
GFM1	ITGB1
GGH	ITPR3
GHITM	IWS1
GLG1	JMJD1C
GLMN	JUN
GLRX	JUNB
GLT8D1	JUND
GMEB2	JUP
GMPS	KANSL1
GNAI2	KANSL3
GNAI3	KAT5
GNB1	KATNA1
GNB4	KCNAB2
GNL2	KCTD18
GNL3	KDM1A
GNS	KDM6A
GOLM1	KDSR
GOLM2	KHDRBS1
GORASP2	KHSRP
GPC1	KIAA2013
GPD2	KIF18A
GPKOW	KIF22
GPS1	KIF23
GPS2	KLF10
GPX8	KLF4
GRB10	KLF5
GRHPR	KMT2A
GRN	KMT2B
GSK3A	KMT2D
GSK3B	KMT5A
GSN	KNL1
GSPT1	KPNA2
GSTO1	KRI1
GTF2A1	KRT1
GTF2E2	KRT10
GTF2F2	KRT13
GTF2I	KRT17
GTF3C1	KRT18
GTPBP4	KRT2
H1-10	KRT7
H4C9	KRT8
HABP2	KTN1
HACL1	L1CAM
HADHA	L3MBTL2
HAUS2	LACTB
HAX1	LAMB1
HBA1	LAMB3
HBB	LAMC1
HBS1L	LAMP1
HCFC1	LAMP2
HCFC2	LANCL1
HDAC1	LARP4
HDAC2	LARP4B
HDGF	LARP7
HDGFL2	LAS1L
HDGFL3	LASP1
HDHD5	LBR
HDLBP	LCN15
HEATR3	LCP1
HIBADH	LDB1
HIRA	LDHA
HLA-A	LDHB
HLA-C	LDLR
HMGB1	LEMD3
HMGN5	LENG8
HMOX2	LGALS3BP
HNRNPA0	LIG3
HNRNPA1	LIMA1
HNRNPA1L2	LIN54
HNRNPA2B1	LMAN1
HNRNPA3	LMAN2
HNRNPAB	LMAN2L
HNRNPC	LMNA
HNRNPF	LMNB1
HNRNPH1	LMNB2
HNRNPH2	LMO7
HNRNPH3	LPCAT1
HNRNPK	LRIF1
HNRNPR	LRPAP1
HNRNPU	LRPPRC
HNRNPUL1	LSM10
HNRNPUL2	LSM14A
HOXA11	LSM2
HOXA5	LSM8
HOXC10	LTF
HOXC9	LUC7L3
HP1BP3	LUZP1
HPDL	LY6K
HPF1	MACF1
HRAS	MACROH2A1
HSD17B10	MAFG
HSD17B11	MAFK
HSD17B12	MAGED2
HSD17B4	MAN1B1
HSP90AB1	MAP4
HSP90B1	MAP7
HSPA13	MAP7D1
HSPA2	MAPRE1
HSPA4	MARCHF5
HSPA4L	MARS1
HSPA5	MAT2A
HSPA8	MATR3
HSPA9	MBD3
HSPB1	MBD6
HSPBP1	MBIP
HSPD1	MBNL1
HSPE1	MBTPS1
HSPH1	MCAM
HYOU1	MCM10
ICE1	MCM2
IDH3A	MCM3
IDH3G	MCM3AP
IFRD2	MCM4
IGF2R	MCM7
IKBIP	MCRS1
ILF3	MCTS1
ILVBL	MDC1
IMPDH2	MDH2
INCENP	MDN1
ING3	MECP2
INTS1	MED1
INTS12	MED13
INTS4	MED13L
INTS6	MED14
IPO7	MED15
IQGAP1	MED16
IRF2BP2	MED22
ITGA3	MED9
ITGA5	MEF2D
ITGA6	METAP2
ITGAV	METTL15
ITGB1	MGA
ITPR3	MGAT2
ITSN2	MGMT
IWS1	MIDEAS
JMJD1C	MIF
JPT2	MISP
JUN	MKI67
JUNB	MLEC
JUND	MLH1
JUP	MORC2
KANSL1	MORF4L2
KANSL3	MPG
KARS1	MPO
KAT5	MRE11
KATNA1	MRM3
KCNAB2	MRPL19
KCTD18	MRPL33
KDM1A	MRPL41
KDM6A	MRPL46
KDSR	MRPL47
KEAP1	MRPL50
KHDRBS1	MRPS11
KHDRBS2	MRPS22
KHSRP	MRPS23
KIAA0930	MRPS27
KIAA2013	MRPS34
KIF18A	MRPS9
KIF22	MRRF
KIF23	MSH6
KLF10	MSI2
KLF4	MSL1
KLF5	MTA1
KLHL7	MTDH
KMT2A	MUC1
KMT2B	MUC5B
KMT5A	MXI1
KNL1	MYBBP1A
KPNA2	MYBL2
KRI1	MYH10
KRT1	MYH14
KRT10	MYH9
KRT13	MYL6B
KRT17	MYO1G
KRT18	MYO6
KRT2	MYPN
KRT7	NAPA
KRT8	NAT10
KTN1	NBN
L1CAM	NCBP1
L3MBTL2	NCL
LACTB	NCLN
LAMP1	NCOA5
LAMP2	NCOR1
LANCL1	NCR3LG1
LARP4	NCSTN
LARP4B	ND3
LARP7	NDC1
LAS1L	NDUFAF2
LASP1	NDUFB11
LBR	NDUFS1
LCN15	NDUFS3
LDB1	NELFB
LDHA	NFIA
LDHB	NFIB
LDLR	NFIC
LEMD3	NFKB1
LENG8	NFRKB
LGALS3BP	NFYA
LGMN	NFYC
LIG3	NKAP
LIMA1	NME1
LIMCH1	NME2
LIN54	NOC2L
LMAN1	NOL8
LMAN2	NOLC1
LMAN2L	NOM1
LMNA	NONO
LMNB1	NOP14
LMNB2	NOP2
LMO7	NOP56
LNPK	NOP58
LPCAT1	NPEPPS
LRIF1	NPM1
LRPAP1	NPTN
LRPPRC	NR2C1
LRRC47	NR2C2
LRRFIP2	NR3C1
LSM10	NRF1
LSM14A	NUDT16L1
LSM2	NUFIP2
LSM8	NUMA1
LTA4H	NUP107
LTF	NUP133
LUC7L3	NUP153
LUZP1	NUP155
LY6K	NUP160
MACF1	NUP188
MACROH2A1	NUP205
MAFG	NUP210
MAFK	NUP214
MAGED2	NUP35
MAP2K2	NUP42
MAP2K4	NUP50
MAP2K6	NUP54
MAP4	NUP58
MAP7	NUP62
MAP7D1	NUP93
MAPRE1	NUP98
MAPRE2	NUSAP1
MARCHF5	NXF1
MARS1	OCIAD1
MARS2	OGT
MAT2A	ORC2
MAT2B	ORC5
MATR3	OSGEP
MAU2	P3H1
MBD3	P4HA2
MBIP	PA2G4
MBNL1	PABPC1
MBTPS1	PABPC4
MCAM	PABPN1
MCM10	PAF1
MCM2	PALLD
MCM3	PARK7
MCM3AP	PAWR
MCM4	PAXBP1
MCM7	PAXX
MCRS1	PBRM1
MCTS1	PBX2
MDC1	PBXIP1
MDH2	PCBP1
MDN1	PCMT1
ME2	PCNA
MECP2	PCNP
MED1	PDCD11
MED13	PDCD6IP
MED14	PDHA1
MED15	PDIA3
MED16	PDIA4
MED22	PDLIM1
MED9	PDLIM5
MEF2A	PDLIM7
MEF2D	PDS5A
METAP2	PEBP1
METTL13	PELO
METTL15	PELP1
MFF	PGD
MFGE8	PGK1
MGA	PGLS
MGAT2	PHB1
MGMT	PHB2
MICALL2	PHC3
MIDEAS	PHF12
MIER1	PHF21A
MIF	PHF6
MINPP1	PHF8
MISP	PHGDH
MITF	PICALM
MKI67	PIGS
MLEC	PINX1
MLH1	PKM
MLKL	PKP2
MMAB	PLAUR
MND1	PLEC
MOB4	PLIN3
MORC2	PLK1
MORC3	PLOD1
MORF4L2	PLOD2
MPG	PLOD3
MPO	PLRG1
MPP1	PLS3
MPRIP	PMPCA
MRE11	PMPCB
MRM3	PNN
MRPL19	PNO1
MRPL2	POGLUT1
MRPL33	POGLUT2
MRPL41	POGZ
MRPL46	POLDIP3
MRPL47	POLR1B
MRPL50	POLR2B
MRPS11	POM121
MRPS22	PON2
MRPS23	POP1
MRPS27	POP5
MRPS33	POU2F1
MRPS34	PPIA
MRPS5	PPIB
MRPS9	PPIE
MRRF	PPP1R10
MSH6	PPP1R12A
MSI2	PPP1R18
MSL1	PPP1R8
MTA1	PPP2R1A
MTDH	PPP3CA
MTERF3	PPT1
MTFR1	PQBP1
MTHFD1L	PRDM1
MUC1	PRDM2
MVK	PRDX1
MXI1	PRDX2
MYBBP1A	PRKDC
MYBL2	PRPF19
MYD88	PRPF3
MYH10	PRPF4
MYH9	PRPF6
MYL6B	PRPF8
MYO1G	PRPS1
MYO6	PRR14
MYPN	PRRC1
NAA15	PRRC2A
NAB2	PRRC2C
NABP1	PRSS3
NAPA	PSAP
NARS2	PSIP1
NAT10	PSMA1
NAV2	PSMA4
NBN	PSMA5
NCAPD2	PSMA7
NCBP1	PSMB1
NCEH1	PSMB4
NCL	PSMC4
NCLN	PSMD14
NCOA5	PSMD2
NCOR1	PSMD3
NCR3LG1	PSMD8
ND3	PSMG1
NDC1	PSPC1
NDRG1	PTBP1
NDRG3	PTGFRN
NDUFAF2	PTTG1IP
NDUFAF7	PUM1
NDUFB11	PUM3
NDUFB8	PWP2
NDUFS1	PYCR1
NDUFS3	QKI
NEDD4L	QSER1
NEK7	RAB11B
NELFA	RAB2A
NELFB	RAB5C
NELFE	RAB5IF
NFE2L1	RAB6A
NFIA	RAB7A
NFIB	RAC2
NFIC	RACGAP1
NFIX	RACK1
NFKB1	RAD18
NFRKB	RAD23B
NFYA	RAI1
NFYC	RANBP1
NIBAN2	RANBP2
NKAP	RANGAP1
NME1	RARS2
NME2	RBBP4
NMI	RBBP6
NOC2L	RBM10
NOL8	RBM14
NOLC1	RBM15
NOM1	RBM15B
NONO	RBM22
NOP14	RBM25
NOP2	RBM26
NOP56	RBM27
NOP58	RBM4
NPEPPS	RBM47
NPLOC4	RBM7
NPM1	RBMS2
NPTN	RBMX
NR1H3	RBPJ
NR2C1	RCC1
NR2C2	RCC2
NR3C1	RCN1
NR4A3	RCOR1
NRF1	RDX
NSMCE4A	RECQL
NUBP2	REEP4
NUDCD2	RFC1
NUDT16L1	RFC4
NUFIP2	RFX1
NUMA1	RFX5
NUP107	RIF1
NUP133	RMDN1
NUP153	RNF2
NUP155	RNF20
NUP160	RNPS1
NUP188	RPA1
NUP205	RPF1
NUP210	RPL18
NUP214	RPL18A
NUP35	RPL19
NUP42	RPL23A
NUP50	RPL29
NUP54	RPL32
NUP58	RPL4
NUP62	RPL8
NUP93	RPL9
NUP98	RPLP0
NUSAP1	RPLP2
NXF1	RPN1
OCIAD1	RPN2
OGDH	RPP25
OGT	RPRD1A
ORC2	RPRD2
ORC5	RPS12
OSGEP	RPS16
OXSM	RPS2
OXSR1	RPS27A
P3H1	RPS4X
P3H4	RPS6
P4HA2	RPS6KA1
PA2G4	RRBP1
PABPC1	RREB1
PABPC4	RRP12
PABPN1	RRP1B
PACSIN2	RRP8
PAF1	RRS1
PAK2	RSBN1L
PALLD	RSL1D1
PALM2AKAP2	RTCB
PARK7	RTN4
PAWR	RUNX1
PAXBP1	RUNX2
PAXX	RUNX3
PBRM1	RUVBL2
PBX2	SAFB2
PBXIP1	SAMD1
PCBP1	SAMM50
PCGF2	SAP130
PCK2	SAP18
PCMT1	SAP30BP
PCNA	SARNP
PCNP	SARS1
PDCD11	SART1
PDCD6IP	SBSN
PDHA1	SCAF11
PDHB	SCAF4
PDIA3	SCARB2
PDIA4	SCML2
PDLIM1	SCPEP1
PDLIM5	SCYL2
PDLIM7	SDF2L1
PDS5A	SDHA
PDS5B	SEC13
PEBP1	SEC22B
PECR	SEC23A
PELO	SEC23IP
PELP1	SEC24B
PGD	SEC24C
PGK1	SEC31A
PGLS	SEC61B
PGM1	SEC62
PGP	SEC63
PHB1	SEPTIN11
PHB2	SEPTIN7
PHC3	SEPTIN9
PHF1	SERBP1
PHF21A	SERPINA1
PHF3	SERPINB3
PHF6	SERPINB5
PHF8	SERPINE2
PHGDH	SERPINH1
PHIP	SESN2
PHLDB2	SET
PICALM	SETD1A
PIGS	SF1
PINX1	SF3A1
PITX1	SF3A2
PKM	SF3B1
PKP2	SF3B3
PLAUR	SFN
PLBD2	SFPQ
PLEC	SFXN1
PLIN2	SGF29
PLIN3	SGSH
PLK1	SIN3A
PLOD1	SIRT7
PLOD2	SIX4
PLOD3	SKI
PLRG1	SLAIN2
PLS1	SLC16A3
PLS3	SLC1A5
PMPCA	SLC25A11
PMPCB	SLC25A12
PNN	SLC25A13
PNO1	SLC25A6
PNPLA8	SLC27A2
POGLUT1	SLC29A1
POGLUT2	SLC2A1
POGZ	SLC35E1
POLD2	SLC39A7
POLDIP3	SLC44A2
POLE2	SLC7A11
POLR1B	SLFN5
POLR2B	SLTM
POM121	SLU7
PON2	SLX9
POP1	SMARCA2
POP5	SMARCA4
POU2F1	SMARCB1
PPA2	SMARCC1
PPIA	SMARCD1
PPIB	SMARCD2
PPIE	SMC1A
PPIG	SMCHD1
PPP1R10	SMNDC1
PPP1R12A	SNAI1
PPP1R18	SND1
PPP1R8	SNRNP200
PPP2R1A	SNRNP70
PPP2R5D	SNRPA
PPP3CA	SNRPA1
PPP6C	SNRPB
PPT1	SNRPB2
PQBP1	SNRPD2
PRCC	SNW1
PRDM10	SOAT1
PRDM2	SON
PRDX1	SORBS2
PRDX2	SP1
PRKACB	SP2
PRKAR1A	SP3
PRKDC	SPATS2
PRPF19	SPATS2L
PRPF3	SPCS2
PRPF4	SPEN
PRPF40A	SPOP
PRPF6	SPPL2B
PRPF8	SPTAN1
PRPS1	SPTBN1
PRPS2	SRBD1
PRRC1	SRCAP
PRRC2A	SRF
PRRC2C	SRFBP1
PRSS3	SRP14
PSAP	SRP54
PSIP1	SRPRA
PSMA1	SRPRB
PSMA4	SRRM2
PSMA5	SRRT
PSMA7	SRSF10
PSMB1	SRSF11
PSMB4	SRSF5
PSMC4	SRSF6
PSMD1	SRSF7
PSMD14	SSBP1
PSMD2	SSBP3
PSMD3	SSR1
PSMD8	SSRP1
PSMG1	ST13
PSPC1	ST3GAL4
PTBP1	STAT3
PTCD3	STIM1
PTGFRN	STRAP
PTPA	STT3A
PTPN2	STT3B
PTTG1IP	SUB1
PUM1	SUDS3
PUM3	SUGP1
PWP2	SUGP2
PYCR1	SUN1
PYCR2	SUN2
QKI	SUPT16H
RAB11B	SUPT20H
RAB11FIP5	SURF1
RAB2A	SUZ12
RAB33B	SYMPK
RAB5C	SYN3
RAB5IF	SYPL1
RAB6A	TAF12
RAB7A	TAF4
RAB8B	TAF4B
RAC2	TAF5
RACGAP1	TAF6
RACK1	TAF7
RAD18	TAF8
RAD23A	TAF9
RAD23B	TAF9B
RAD50	TAGLN2
RANBP1	TARDBP
RANBP2	TASOR2
RANGAP1	TAX1BP3
RAP1GDS1	TBL1X
RARS2	TBL3
RBBP4	TBP
RBBP6	TBRG1
RBM10	TCF12
RBM14	TCOF1
RBM15	TDRD15
RBM15B	TEAD1
RBM22	TEFM
RBM25	TERF2IP
RBM26	TEX10
RBM27	TFAM
RBM38	TFG
RBM4	TFRC
RBM41	THAP11
RBM47	THOC2
RBM6	THOC3
RBM7	THOC5
RBMX	THOC6
RBPJ	THRAP3
RCC1	THUMPD1
RCC2	THYN1
RCN1	TIAL1
RCOR1	TIMM21
RDX	TIMM23
RECQL	TIMM44
RECQL5	TJP1
REEP4	TK1
RFC1	TKT
RFC4	TMCO1
RFX1	TMED4
RFX5	TMEM106B
RIF1	TMEM109
RIOK2	TMEM165
RIOX2	TMEM209
RMDN1	TMEM231
RMND1	TMEM245
RNF2	TMOD3
RNF20	TMPO
RNPEP	TMTC3
RNPS1	TNPO1
RO60	TNRC18
RPA1	TNS1
RPF1	TOE1
RPIA	TOMM40
RPL18	TOP1
RPL18A	TOP2A
RPL19	TOP2B
RPL23A	TOR1AIP1
RPL29	TOX4
RPL32	TP53BP1
RPL4	TPD52
RPL8	TPD52L2
RPL9	TPI1
RPLP0	TPM4
RPLP2	TPR
RPN1	TRIM28
RPN2	TRIOBP
RPP25	TRIP12
RPP25L	TRIP13
RPRD1A	TRMT10C
RPRD2	TRPS1
RPS12	TRRAP
RPS16	TSPAN3
RPS2	TTC1
RPS27A	TUBA1B
RPS4X	TUBA1C
RPS6	TUBA4A
RPS6KA1	TUBB
RRAD	TUBB2B
RRBP1	TUBB3
RREB1	TUBB4B
RRP12	TUSC3
RRP1B	TWF2
RRP8	TWIST2
RRS1	TXNDC5
RSBN1L	TXNL4A
RSL1D1	TYMP
RSRC1	U2SURP
RTCB	UBA52
RTF2	UBAP2
RTN3	UBAP2L
RTN4	UBN1
RTN4IP1	UBN2
RUNX1	UBQLN2
RUNX2	UBR5
RUNX3	UBTF
RUVBL2	UQCRC2
SAFB2	UQCRFS1
SAMD1	URB1
SAMM50	USF2
SAP130	USP14
SAP18	USP39
SAP30BP	USP7
SARNP	UTP18
SARS1	VAPA
SARS2	VAPB
SART1	VARS1
SBSN	VCP
SCAF11	VDAC1
SCAF4	VDAC2
SCARB2	VDAC3
SCFD1	VEZF1
SCML2	VIM
SCPEP1	VTA1
SCYL2	VTI1B
SDE2	VTN
SDF2L1	WARS2
SDHA	WBP11
SDHB	WDR33
SEC13	WDR36
SEC22B	WDR43
SEC23A	WDR5
SEC24B	WIPF2
SEC24C	WIZ
SEC31A	WNK1
SEC61B	XPC
SEC62	XPO1
SEC63	XRCC1
SEPTIN11	XRCC6
SEPTIN7	XXYLT1
SEPTIN9	YAF2
SERBP1	YARS1
SERPINA1	YARS2
SERPINB3	YBX1
SERPINB5	YBX3
SERPINE2	YEATS2
SERPINH1	YIF1B
SESN2	YME1L1
SET	YTHDC1
SETD1A	YTHDF2
SETD7	YTHDF3
SETMAR	YWHAQ
SF1	YWHAZ
SF3A1	YY1
SF3A2	ZBTB11
SF3B1	ZBTB21
SF3B3	ZBTB48
SFN	ZBTB7A
SFPQ	ZC3H11A
SFXN1	ZC3H14
SGF29	ZC3HAV1
SGSH	ZFC3H1
SH2D4A	ZFR
SH3D19	ZFX
SH3GL1	ZHX1
SH3KBP1	ZHX2
SIL1	ZHX3
SIN3A	ZMYM3
SIRT5	ZMYND8
SIRT7	ZNF148
SKI	ZNF207
SKP2	ZNF281
SLAIN2	ZNF326
SLC16A3	ZNF362
SLC1A5	ZNF384
SLC25A11	ZNF512
SLC25A12	ZNF512B
SLC25A13	ZNF592
SLC25A6	ZNF609
SLC27A2	ZNF638
SLC29A1	ZNF687
SLC2A1	ZZZ3
SLC35E1
SLC39A7
SLC44A1
SLC44A2
SLC4A1AP
SLC7A11
SLFN5
SLTM
SLU7
SLX9
SMAD4
SMAD5
SMAP2
SMARCA4
SMARCB1
SMARCC1
SMARCD1
SMARCD2
SMC1A
SMC3
SMCHD1
SMDT1
SMNDC1
SNAI1
SNAP29
SNAPC1
SNCA
SNCG
SND1
SNRNP200
SNRNP70
SNRPA
SNRPA1
SNRPB
SNRPB2
SNRPD2
SNTB2
SNUPN
SNW1
SNX5
SOAT1
SOD2
SON
SORBS2
SORBS3
SP1
SP100
SP2
SP3
SPAG7
SPATA33
SPATS2
SPATS2L
SPCS2
SPEN
SPOP
SPPL2B
SPRYD4
SPTAN1
SPTBN1
SRBD1
SRCAP
SRFBP1
SRP14
SRP54
SRP72
SRPRA
SRPRB
SRRM1
SRRM2
SRRT
SRSF10
SRSF11
SRSF4
SRSF5
SRSF6
SRSF7
SSBP1
SSBP3
SSR1
SSRP1
ST13
ST3GAL4
STAT1
STAT3
STAU2
STIM1
STIP1
STK35
STMN1
STRAP
STT3A
STT3B
STXBP1
SUB1
SUCLG1
SUDS3
SUGP1
SUGP2
SUMF1
SUMF2
SUN1
SUN2
SUPT16H
SUPT20H
SUPT5H
SURF1
SUZ12
SYMPK
SYN3
SYPL1
SZRD1
TACO1
TAF12
TAF4
TAF4B
TAF5
TAF6
TAF7
TAF8
TAF9
TAF9B
TAGLN2
TAP1
TARDBP
TASOR2
TAX1BP3
TBL1X
TBL3
TBP
TBRG1
TCF12
TCOF1
TDP1
TEAD1
TEAD3
TEFM
TERF2IP
TEX10
TFAM
TFAP4
TFE3
TFG
TFRC
THAP11
THBS1
THG1L
THOC2
THOC3
THOC5
THOC6
THRAP3
THUMPD1
THYN1
TIAL1
TIMM21
TIMM23
TIMM44
TJP1
TK1
TKT
TLN1
TMCO1
TMED4
TMEM106B
TMEM109
TMEM165
TMEM209
TMEM231
TMEM245
TMEM263
TMOD3
TMPO
TMX4
TNKS1BP1
TNPO1
TNRC18
TNS1
TOE1
TOMM40
TOP1
TOP2A
TOP2B
TOR1AIP1
TOX4
TP53BP1
TPD52
TPD52L2
TPI1
TPM4
TPR
TPRN
TRIM28
TRIM38
TRIM39
TRIOBP
TRIP12
TRIP13
TRIP6
TRMT10C
TRNT1
TRPS1
TRRAP
TRUB1
TSN
TSPAN3
TSSC4
TTC1
TTC5
TUBA1B
TUBA1C
TUBA4A
TUBB
TUBB2B
TUBB3
TUBB4B
TUSC3
TWF2
TWIST2
TXLNA
TXNDC12
TXNDC5
TXNL4A
TYMP
TYMS
U2SURP
UACA
UBA1
UBA52
UBAP2
UBAP2L
UBN1
UBN2
UBR5
UBTF
UCK2
UGDH
UNC119B
UNC45A
UQCRC2
UQCRFS1
URB1
USF2
USP14
USP39
USP42
USP7
UTP18
VAPA
VAPB
VARS1
VCP
VDAC1
VDAC2
VDAC3
VEZF1
VIM
VIPAS39
VPS37A
VRK3
VTA1
VTI1B
VTN
VWA8
WARS2
WBP11
WDR13
WDR33
WDR36
WDR43
WDR5
WIPF2
WIZ
XPC
XPO1
XRCC1
XRCC6
XXYLT1
YAF2
YARS1
YARS2
YBX1
YBX3
YEATS2
YIF1B
YLPM1
YME1L1
YRDC
YTHDC1
YTHDF2
YTHDF3
YWHAQ
YWHAZ
YY1
ZBTB11
ZBTB21
ZBTB7A
ZC3H11A
ZC3H13
ZC3H14
ZC3HAV1
ZFC3H1
ZFR
ZFX
ZFYVE21
ZHX1
ZHX2
ZHX3
ZMYM3
ZMYND8
ZNF148
ZNF185
ZNF207
ZNF281
ZNF326
ZNF362
ZNF384
ZNF512
ZNF512B
ZNF592
ZNF609
ZNF638
ZNF687
ZNF800
ZNF830
ZNRD2
ZSCAN5A
ZYX
ZZZ3

## Sheet: S6
Gene	LOG2_fold_chang_of_O-GlcNAcylation_degree_low_vs_high	p-value		Gene	LOG2_fold_change_of_DNA-binding_capability_low_vs_high	p-value
ACTL6A	0.843908	2.66987e-08		ACTL6A	0.426389	0.00106761
ACTR8	0.884744	1.69351e-06		ACTR8	1.43069	0.00025278
ADNP	-0.654835	0.50911		ADNP	-1.34724	0.0145079
AHCTF1	-1.35973	7.1458e-09		AHCTF1	-1.72458	2.14936e-12
ALYREF	0.270796	0.00228871		ALYREF	0.456959	5.64291e-08
ANP32A	0.216793	0.784894		ANP32A	-0.423084	0.256023
ANP32B	0.105967	0.842182		ANP32B	-0.430403	0.0778817
ANP32E	-0.380933	0.664749		ANP32E	-2.07388	0.0320836
APEX1	0.463579	0.000703765		APEX1	-0.589042	6.9607e-05
ARGLU1	1.80584	2.30982e-05		ARGLU1	3.35526	1.97258e-13
ARID2	5.94028	1.65613e-10		ARID2	3.67915	1.99583e-06
ARID4A	4.4393	0.000157145		ARID4A	8.94609	0.0130826
ARNT	2.98893	0.0713497		ARNT	2.87137	3.55454e-08
ASF1A	2.89492	0.000657118		ASF1A	-0.308848	0.337227
ASH2L	-0.287338	0.005784		ASH2L	-0.327707	9.58836e-06
ATAD2	-0.662171	0.439791		ATAD2	-1.62599	0.00344247
AURKB	0.431476	0.00125598		ATF1	-1.92627	1.44979e-12
BANP	0.520644	0.573554		AURKB	0.707545	7.2397e-05
BAZ1B	-0.793993	1.80713e-06		BANP	1.07426	0.000867391
BBX	3.45949	2.6252e-09		BAZ1B	-0.917649	7.08463e-07
BCLAF1	4.93261	3.6414e-08		BBX	3.71315	5.28575e-12
BCOR	5.35264	0.00113782		BCLAF1	5.11762	3.71285e-09
BHLHE40	1.73913	0.181756		BCOR	1.85383	2.23465e-07
BLM	-1.06879	2.91624e-09		BHLHE40	0.717668	9.90629e-05
BMI1	-1.32349	0.000202778		BLM	-1.09044	1.72204e-13
BPTF	-1.74908	6.63443e-08		BMI1	-1.79202	0.0264145
BRD3	-0.168298	0.112868		BPTF	-2.88738	3.75945e-07
BRD8	6.07866	4.34921e-12		BRD3	-0.124923	0.442885
BRMS1L	0.0431154	0.862147		BRD8	3.66104	0.0309447
BTAF1	-2.61427	0.0119896		BRMS1L	0.648154	0.433875
BUD31	0.868568	0.0082919		BUD31	1.92482	7.01295e-08
ATF1	1.58733	0.162398		C1D	-4.52422	1.06e-07
ATF6B	0.226175	0.517015		CBX2	1.87496	0.00101593
C1D	-3.05069	3.91122e-09		CBX3	-1.00557	0.000279888
CARM1	5.27513	0.00699147		CBX4	-0.0602798	0.461818
CBX2	-2.73953	0.0283084		CBX5	-0.368286	0.0504552
CBX3	-0.630416	0.00257751		CBX8	0.0574945	0.412311
CBX4	-0.502888	2.22685e-05		CCAR1	-0.0989777	0.157374
CBX5	0.584797	0.0768861		CCAR2	0.372096	7.69583e-05
CBX8	0.0108029	0.88672		CCDC59	1.16809	2.15094e-11
CCAR1	2.65701	1.69268e-11		CCNC	1.32621	0.0412401
CCAR2	0.990049	1.47174e-05		CCNH	-0.92037	0.432265
CCDC59	0.247794	0.00314079		CCNK	4.29119	8.94784e-06
CCNC	2.07284	1.77586e-07		CDC5L	-0.488681	2.70571e-05
CCNH	-0.342036	0.840241		CDC73	0.930152	4.10326e-08
CCNK	5.58788	1.96834e-09		CDK2	-0.155979	0.542776
CDC5L	-0.316334	0.000366932		CDK5	-0.608761	0.692433
CDC73	0.392387	3.60123e-05		CDK7	-0.824701	0.00562207
CDK2	-0.926074	0.0477182		CDK8	0.727339	0.0476098
CDK5	-0.417617	0.536714		CDK9	1.0397	6.56626e-06
CDK7	-2.32519	0.387977		CDYL	-0.675321	0.000156702
CDK8	2.83667	1.84516e-07		CEBPB	1.10094	6.27353e-12
CDK9	0.885101	1.79532e-07		CENPF	4.39515	3.04463e-05
CDYL	-1.02828	6.97405e-05		CGGBP1	1.13435	3.78538e-07
CEBPB	0.060921	0.740517		CHAF1B	0.343838	0.0591405
CENPB	2.71885	0.0294576		CHD3	-2.8404	2.17284e-06
CENPF	3.31725	0.00166661		CHD4	-1.01357	0.000422742
CGGBP1	0.905342	3.35518e-06		CHEK1	1.98708	0.106288
CHAF1B	0.0696804	0.876875		CHRAC1	-1.24672	0.0107223
CHD3	0.102947	0.85969		CHTOP	0.0992079	0.0210725
CHD4	-0.184784	0.190108		CLOCK	1.146	7.26677e-09
CHEK1	2.68308	0.151033		CNBP	0.308739	4.32571e-05
CHRAC1	-3.7389	0.0554936		CNOT11	-1.64988	3.43024e-08
CHTOP	-1.10216	3.2901e-08		COPS5	1.54272	0.0944582
CLOCK	1.89982	0.000915906		CREB1	-0.0905648	0.0125421
CNBP	0.0808177	0.89908		CREB5	-0.0277999	0.673664
CNOT11	-0.703462	0.362879		CSNK2A1	-1.41105	2.90925e-05
COPS5	3.02487	0.317387		CTBP1	-0.188943	0.252092
CREB1	1.85233	2.29166e-06		CTBP2	0.439955	0.0692399
CREB5	0.187164	0.169903		CTCF	2.69323	2.98713e-13
CSNK2A1	-0.745375	0.112674		CTR9	4.22579	3.43548e-05
CTBP1	-0.527548	0.401341		CXXC1	-1.46168	8.0799e-06
CTBP2	0.844302	0.468494		CXXC5	2.24042	7.10802e-10
CTCF	2.33009	0.0028351		DDX1	-0.447746	0.00610364
CTR9	3.52764	0.00788459		DDX17	1.05522	1.22432e-10
CXXC1	-1.34808	1.83658e-09		DDX20	0.298998	0.530683
CXXC5	1.25602	0.0528392		DDX39B	-0.290687	0.000927128
DDX1	-0.513644	0.000114133		DDX5	1.5927	8.31964e-12
DDX17	0.581779	3.23938e-08		DEK	0.312938	1.35267e-05
DDX20	1.41059	6.78622e-06		DHX33	-1.52032	1.17045e-09
DDX39B	-0.0694585	0.227302		DHX36	3.35951	1.70078e-10
DDX5	0.797732	5.81118e-06		DHX9	0.924487	5.89361e-10
DEK	-0.0486402	0.582084		DLX1	-0.130693	0.0166555
DHX33	-1.88612	9.28488e-13		DMAP1	0.400518	0.0196599
DHX36	3.83038	2.7386e-07		DNAJB1	-0.268729	0.223404
DHX9	-0.051007	0.289097		DNMT1	-0.89816	2.15744e-06
DLX1	-1.70095	0.172812		DNTTIP2	-0.431606	8.34839e-06
DMAP1	1.19133	3.83197e-09		DPF2	0.113002	0.567449
DNAJB1	0.242909	0.43504		DPY30	0.531698	0.00283108
DNMT1	-0.555137	0.00129307		DR1	-1.2236	5.94792e-08
DNTTIP2	-0.376078	0.140728		E2F6	0.354987	0.0408866
DPF2	1.65867	3.43353e-06		EED	-0.622639	4.40042e-05
DPY30	1.82678	0.00834586		EGR1	3.22971	1.66924e-11
DR1	-1.05484	0.00136216		EHMT1	4.01455	5.14973e-05
E2F6	0.175757	0.415422		ELF1	2.00321	4.5278e-10
EED	-1.03987	0.000302467		ELF2	-1.41263	1.76966e-07
EGR1	3.09454	1.31569e-09		ELK1	0.738174	1.25184e-05
EHMT1	3.77437	4.17398e-08		ELK3	4.10202	1.17701e-08
ELF1	1.55401	0.014933		EMSY	1.51973	0.216599
ELF2	-1.13471	0.000507625		EP400	3.23322	0.0730616
ELK1	1.60354	0.487365		EPC1	3.27573	0.0385927
ELK3	5.94946	0.000502983		ERCC3	1.53987	0.0233806
ELL	0.880402	0.00137719		ETV3	1.86699	9.16722e-08
EMSY	1.84587	5.1188e-06		EWSR1	0.135619	0.366244
EP300	2.32863	3.00123e-06		EYA1	5.95764	7.04146e-08
EP400	3.87529	6.58238e-11		EZH2	-2.42275	7.61548e-09
EPC1	4.22974	3.46983e-09		FGF2	1.01507	7.19036e-08
EPC2	5.20538	1.46923e-06		FIZ1	4.40873	6.14927e-08
ERCC2	2.06641	0.0400353		FOS	-0.761165	0.00134591
ERCC3	3.26123	0.0632258		FOSL2	-0.623543	2.35627e-09
ETV3	0.630631	0.335986		FOXA1	3.90218	1.20827e-07
EWSR1	0.209183	0.120597		FOXC1	3.18679	6.85119e-08
EYA1	9.31321	0.0091835		FOXC2	1.28867	4.74131e-08
EYA3	3.30504	3.61267e-05		FOXF2	5.03216	3.57913e-10
EZH2	-2.49881	6.85651e-06		FOXK1	6.1987	3.70901e-13
FGF2	-0.478415	0.000395872		FOXK2	-1.2108	3.73308e-06
FIZ1	4.88363	7.37706e-06		FOXL2	1.10931	1.32461e-05
FOS	0.54708	0.322271		FOXP1	3.99409	1.41414e-11
FOSL2	0.972707	0.000133947		FOXP4	2.03298	3.50336e-06
FOXA1	3.59968	0.00147298		FUS	0.425722	0.00147019
FOXC1	3.21119	1.54571e-07		GABPA	0.521136	5.966e-06
FOXC2	2.05434	0.0546627		GATA2	2.60945	1.61331e-07
FOXF2	5.73739	0.00705747		GATAD1	-0.410028	0.0950618
FOXK1	6.79991	6.65868e-12		GATAD2A	0.895172	8.08875e-06
FOXK2	-1.09609	5.90568e-06		GATAD2B	0.640989	6.02398e-07
FOXL2	0.575309	0.0150401		GNL3	-0.0549344	0.0560891
FOXP1	2.09562	6.91214e-07		GSK3B	2.17425	4.35481e-05
FOXP4	2.85702	5.19785e-05		GTF2B	2.24766	0.000390628
FUS	-0.0472993	0.61872		GTF2H2	0.274138	0.605363
GABPA	0.0533407	0.940692		GTF2H3	0.443842	0.357239
GATA2	1.61963	0.0574914		GTF2H4	1.17351	1.21816e-07
GATAD1	-0.61186	4.41402e-06		GTF2I	-1.25172	1.52898e-10
GATAD2A	0.89574	6.21688e-05		GTF2IRD1	7.11235	5.70576e-06
GATAD2B	0.0861539	0.691775		HAT1	2.3976	0.0355038
GNL3	-0.516276	1.95294e-07		HCFC1	-0.262736	0.000372648
GPS2	10.7602	1.47281e-06		HCFC2	5.76687	9.21401e-11
GSK3B	1.44612	0.304884		HDAC1	1.54852	5.31213e-08
GTF2B	4.12903	0.00453882		HDAC2	-0.357349	0.00612907
GTF2H2	0.826851	0.237114		HDAC3	-0.330443	0.479259
GTF2H3	-0.253216	0.705974		HDGF	-0.357584	0.00436093
GTF2H4	0.930375	0.00738833		HEATR1	-1.30811	0.000424126
GTF2I	-1.14272	1.92142e-09		HELLS	-2.70038	0.0909671
GTF2IRD1	5.08248	0.00162863		HIRA	3.07457	1.66286e-06
HAT1	-0.0625733	0.915135		HLTF	5.40045	4.53304e-13
HCFC1	-0.946908	7.06812e-12		HMG20B	0.787621	1.61907e-05
HCFC2	5.44502	0.0155869		HMGA1	-1.55252	6.59865e-11
HDAC1	0.71518	2.41136e-05		HMGB1	1.04906	1.6315e-07
HDAC2	-0.813421	6.77312e-05		HMGB2	0.785109	8.16896e-07
HDAC3	1.20015	6.23618e-05		HMGB3	-0.740638	2.04416e-08
HDGF	-0.213264	0.0769595		HMGXB4	2.10847	0.00646857
HEATR1	-0.930414	9.86031e-07		HNRNPC	-0.653635	1.1908e-08
HELLS	-3.4617	4.75058e-06		HNRNPD	-0.23713	9.613e-06
HIRA	3.63991	1.63976e-10		HNRNPK	-0.0634687	0.170746
HIVEP1	0.420261	0.174836		HNRNPU	1.13172	1.79646e-13
HLTF	4.75126	9.24303e-11		HOXC9	2.15236	2.84648e-09
HMG20B	0.379674	0.0161765		HSPA8	0.186688	0.000253218
HMGA1	-0.106917	0.511061		ILF2	1.6846	1.25916e-08
HMGB1	0.768233	8.99601e-05		ING1	3.68283	3.77281e-05
HMGB2	0.605132	1.34819e-05		INO80	2.58694	8.54448e-07
HMGB3	-0.727598	0.000578909		INO80B	1.51171	2.13707e-05
HMGXB4	2.99377	4.28259e-07		INO80C	1.54475	1.98858e-05
HNRNPC	-0.529133	0.000291637		INO80E	2.02995	1.18856e-06
HNRNPD	-0.395703	7.26877e-06		JUNB	0.678706	4.98397e-10
HNRNPK	0.138663	0.0986892		JUND	0.492075	2.49329e-05
HNRNPU	0.798241	1.06225e-07		KAT5	-0.681845	0.304443
HOXC9	3.75194	0.000711216		KAT6B	-1.46657	0.0180887
HSPA8	0.177175	0.0254632		KAT8	-2.5542	0.00221787
ICE1	0.721747	0.396635		KCTD1	-1.32343	0.00200152
ILF2	-0.0542965	0.331202		KDM1A	-1.05713	9.73499e-10
ING1	1.20558	0.00558808		KDM1B	3.41605	1.64506e-09
ING3	0.377905	0.272674		KDM2A	2.55131	1.06662e-11
INO80	3.73957	1.324e-10		KDM2B	1.5207	4.64982e-07
INO80B	2.97361	8.7601e-09		KDM5A	11.5891	0.0011515
INO80C	1.76005	1.14962e-05		KHSRP	1.2671	1.93058e-09
INO80E	2.15776	1.0606e-06		KLF16	0.816807	1.34529e-05
JMJD1C	-0.83347	0.187626		KLF3	-0.248674	0.0127068
JUNB	0.44945	0.00534521		KLF4	6.06041	2.55867e-13
JUND	1.97829	0.00141466		KLF5	5.7512	5.30497e-10
KAT2B	0.220344	0.650881		KMT2A	-1.90319	6.03613e-12
KAT5	1.27997	1.25037e-05		KMT2B	4.36174	6.33212e-07
KAT6B	0.499224	0.482309		KMT5A	1.62265	0.0881889
KAT8	-2.60788	1.84752e-07		L3MBTL2	2.87883	5.9471e-11
KCTD1	2.05015	0.424695		LDB1	3.20736	1.08184e-06
KDM1A	-0.731886	0.000270581		LEO1	3.81983	0.000512288
KDM1B	2.99121	2.33203e-12		LIN9	-1.06518	0.080711
KDM2A	1.39657	0.00148672		LRIF1	-0.708985	0.000960325
KDM2B	2.05827	3.73461e-07		LYAR	1.24074	2.47061e-12
KDM5A	13.3549	0.000197096		MAD2L2	4.55091	0.00139068
KDM6A	4.44151	0.000132275		MAFF	1.18638	3.8394e-06
KHSRP	0.907754	6.66747e-08		MAFK	0.223629	0.27456
KLF16	-0.802869	0.00263314		MAX	1.27874	3.12489e-10
KLF3	-0.0826262	0.766749		MAZ	5.60291	1.30398e-11
KLF4	5.2662	1.36404e-07		MBD1	-3.22115	1.37786e-10
KLF5	5.07664	0.0055274		MBD2	-0.453478	0.0419311
KMT2A	-1.19868	0.000175828		MBD3	-0.319468	0.301205
KMT2B	4.30508	3.53248e-08		MBD4	-0.218889	0.00923265
KMT5A	2.23335	0.00831282		MBTD1	2.03329	0.0511636
L3MBTL2	3.11371	2.15793e-07		MCRS1	-0.111201	0.56761
LDB1	1.50262	0.0587706		MEAF6	-1.24181	0.0024974
LEO1	4.42655	0.0103591		MECP2	-1.35571	2.34882e-12
LIN9	-0.83199	0.000252597		MED1	1.23274	4.69658e-05
LRIF1	0.0380165	0.869524		MED10	1.01514	0.0785507
LYAR	1.73433	2.97976e-05		MED11	1.23551	0.00455856
MAD2L2	1.19508	0.0011186		MED12	-5.64534	0.12104
MAFF	0.228016	0.851074		MED14	-1.58607	0.248107
MAFK	-0.427269	0.244605		MED15	0.862871	0.0731476
MAX	0.0914559	0.191163		MED16	0.155921	0.771659
MAZ	4.12822	0.000452733		MED17	5.05442	2.73557e-08
MBD1	-2.93777	0.00132513		MED18	0.156713	0.858281
MBD2	0.417132	0.0176243		MED19	0.566676	0.341938
MBD3	0.98919	0.225684		MED21	3.31572	0.000147314
MBD4	-0.44998	0.000713103		MED22	-0.369451	0.489188
MBTD1	2.67314	4.01977e-07		MED23	2.94978	3.69907e-05
MCRS1	-0.187743	0.0499011		MED25	-0.841306	0.393751
MEAF6	0.496283	0.0699743		MED27	1.11973	0.000378154
MECP2	-0.428145	0.00679336		MED28	-3.11098	0.234085
MED1	2.93721	1.3968e-11		MED29	0.749898	0.138087
MED10	2.57251	2.20673e-07		MED30	0.634205	0.0695921
MED11	3.06867	7.77307e-07		MED31	0.499139	0.0648841
MED12	-2.04797	3.89275e-08		MED4	0.599962	9.48334e-05
MED13	-2.61322	0.00109711		MED6	2.98905	0.0686561
MED14	0.0836948	0.810846		MED7	-0.853784	0.034218
MED15	2.51082	3.02569e-06		MED8	0.587581	0.418138
MED16	2.67884	1.26218e-10		MEF2D	0.851308	0.00120197
MED17	7.46277	1.0898e-12		MEN1	3.09747	2.12493e-13
MED18	1.26343	0.000122419		MGA	-2.38708	1.58799e-06
MED19	2.81974	0.000201166		MLX	4.34505	5.0497e-08
MED21	4.96534	1.83845e-08		MNAT1	0.161476	0.915064
MED22	1.86465	2.93779e-09		MORF4L1	-0.529827	0.000809941
MED23	4.64251	5.26985e-08		MORF4L2	-0.549803	0.00132023
MED25	1.00904	0.00177312		MPHOSPH8	3.38858	2.45326e-06
MED26	6.30534	0.0148055		MRGBP	-0.473219	0.105221
MED27	3.13381	4.94472e-10		MSL3	-1.21719	0.0045233
MED28	2.29501	9.32398e-07		MTA1	3.93235	2.12059e-07
MED29	2.41708	1.27906e-07		MTA2	0.453233	8.4356e-05
MED30	3.4555	3.52022e-09		MTA3	1.34423	1.15925e-06
MED31	2.82773	6.60731e-10		MXI1	6.09713	5.07017e-10
MED4	2.79475	1.06069e-10		MYBBP1A	0.943981	2.00016e-13
MED6	2.77939	6.16042e-09		MYC	1.69438	4.09298e-11
MED7	0.313401	0.670936		NCL	-0.239772	3.55596e-05
MED8	1.60827	1.05861e-05		NELFB	-1.51208	0.16159
MED9	2.95621	0.000754001		NELFE	-0.244483	0.773467
MEF2D	3.2111	1.16179e-08		NFAT5	-2.24533	0.000892391
MEN1	2.98421	1.63361e-08		NFIA	-0.382218	1.17327e-08
MGA	-2.60413	3.31901e-06		NFIB	3.82361	4.94194e-15
MLX	3.71795	0.00195532		NFIC	-0.00614761	0.887606
MNAT1	0.538803	0.00478675		NFIL3	-1.38094	1.89694e-11
MORF4L1	0.210661	0.0211426		NFKB1	3.8465	2.6732e-12
MORF4L2	0.117872	0.0685242		NFRKB	-1.35102	0.0176675
MPHOSPH8	2.01946	0.00804816		NFYA	1.34661	3.7046e-07
MRGBP	0.568903	0.00217307		NFYB	-1.60792	4.02262e-10
MSL3	-0.455779	0.016903		NFYC	-0.327272	6.18406e-05
MTA1	4.43444	3.61838e-07		NKRF	-1.59465	4.00989e-11
MTA2	0.990078	3.08217e-07		NOL11	2.03574	0.00530573
MTA3	1.22006	4.90228e-05		NONO	-0.563477	8.00297e-06
MXI1	6.09033	1.2445e-06		NPM1	-1.78458	2.35969e-11
MYBBP1A	-0.0510178	0.294399		NR2C1	0.207672	0.024168
MYBL2	3.71523	1.4133e-07		NR2C2	0.612429	3.64699e-10
MYC	0.120825	0.879108		NR2F2	0.840888	8.91101e-08
MYO6	5.92693	0.0602367		NR2F6	0.998629	9.81045e-07
NCL	0.934346	2.35477e-07		NR4A1	-3.19576	3.18519e-08
NCOR1	3.14651	2.0342e-06		NRF1	-1.86685	7.22202e-11
NELFB	1.54618	0.118942		NUP62	-1.02616	0.0782101
NELFE	0.171187	0.880288		OGT	4.05979	8.17548e-12
NFAT5	-3.43121	0.0117466		ORC2	0.284225	0.468041
NFIA	1.37152	2.306e-05		PAF1	4.55381	6.64798e-06
NFIB	5.3916	6.95835e-06		PATZ1	2.64491	8.90313e-09
NFIC	1.35932	1.86356e-07		PAXBP1	0.241818	0.71312
NFIL3	-0.191251	0.747322		PBRM1	3.64304	9.50839e-07
NFKB1	2.69472	0.10409		PBX1	-0.914587	0.00243471
NFRKB	-1.05281	2.34848e-05		PBX2	0.266273	0.00808151
NFYA	2.23003	0.000276296		PCGF1	0.586548	8.82891e-05
NFYB	-4.46253	0.317899		PELP1	2.07336	7.44481e-07
NFYC	-1.14643	0.0475122		PHF10	0.444183	0.123121
NKRF	-1.15451	6.15099e-10		PHF2	3.26821	3.55843e-05
NOL11	-0.0261497	0.92435		PHF20	5.62657	0.00714537
NONO	-1.22622	7.27067e-11		PHF21A	-1.1207	0.000719854
NPM1	-0.857399	0.00191626		PHF5A	1.95215	3.89321e-07
NR1H2	5.4525	0.019212		PHF8	2.18557	1.90868e-08
NR2C1	-0.682506	0.254302		PIN1	-2.9047	0.133013
NR2C2	0.0610604	0.589283		PITX1	1.09268	0.000641043
NR2F2	-0.010791	0.928539		PLRG1	0.678058	0.0035604
NR2F6	-0.837459	0.0572109		PML	1.27332	6.49211e-07
NR4A1	-2.76287	2.30608e-05		POU2F1	1.87601	1.7962e-06
NRF1	-3.01716	0.000105329		PPHLN1	1.52811	3.52801e-06
NUP62	-1.25201	2.61489e-07		PPIE	-1.10058	0.0708348
OGT	4.18324	5.31583e-13		PQBP1	2.75358	7.47803e-07
ORC2	0.475649	0.00884784		PRDM1	1.29342	0.0186537
PAF1	3.71373	3.92689e-08		PRMT1	0.464464	0.00577469
PATZ1	1.8036	2.53994e-06		PRPF6	4.53514	9.39631e-13
PAXBP1	-0.123462	0.781981		PSIP1	-0.264706	0.000542886
PBRM1	5.29003	2.88473e-12		PSPC1	0.692967	6.24485e-05
PBX1	-3.19365	0.00429716		PUF60	0.967014	1.5998e-08
PBX2	0.927853	0.274338		PURB	1.30546	2.29748e-10
PBXIP1	-0.666568	0.0184911		RAD21	1.91047	1.96233e-08
PCGF1	0.865696	4.25365e-05		RAI1	0.88242	0.10534
PELP1	2.24745	4.26389e-06		RALY	-0.0218026	0.640337
PHF10	1.78673	4.05017e-07		RAN	0.288435	6.52804e-05
PHF12	1.64032	6.13296e-07		RBBP4	0.823095	1.53528e-08
PHF2	3.57505	0.0128514		RBBP5	0.421974	2.47586e-05
PHF20	4.16019	8.65812e-09		RBBP7	0.816588	5.77371e-06
PHF21A	-1.27446	0.00269993		RBFOX2	0.190307	0.0743355
PHF5A	1.46422	3.125e-06		RBM14	0.765628	1.58678e-11
PHF8	1.98901	0.00316432		RBM15	-0.275386	0.0386233
PIN1	-2.21843	2.16032e-08		RBM15B	-1.34871	0.0191171
PITX1	2.73492	0.186899		RBM39	1.52664	2.11159e-11
PLRG1	0.28922	0.109754		RBMX	0.598932	2.2145e-08
PML	1.92914	5.85499e-06		RBPJ	1.22997	3.1523e-06
POU2F1	1.92343	2.24491e-11		RBX1	-2.06175	1.14274e-11
PPHLN1	1.14295	9.5514e-05		RCOR1	-0.176386	0.0326646
PPIE	0.786378	0.348372		RCOR3	1.57213	3.62687e-07
PQBP1	0.979919	0.240923		RECQL5	-1.49965	4.11567e-06
PRDM1	-2.30364	0.0110732		REPIN1	0.341805	0.00846056
PRMT1	-0.0495475	0.886387		REXO4	1.50495	6.89295e-14
PRPF6	4.9313	3.35105e-09		RFX1	2.35945	1.77216e-05
PSIP1	0.190183	0.269714		RFX5	1.03756	0.020616
PSPC1	1.16461	3.72152e-06		RING1	1.36703	2.00623e-08
PUF60	0.852158	8.84228e-06		RNF2	0.312595	0.0038653
PURB	-0.0597093	0.913816		RPRD1B	0.518838	0.000269894
RAD21	1.35139	0.000336602		RREB1	-0.884093	3.20527e-07
RAI1	0.548469	0.468353		RUNX1	0.268205	0.000646335
RALY	0.753847	4.48074e-06		RUNX2	4.76962	5.89553e-08
RAN	-0.314618	0.000270403		RUNX3	-0.497456	0.00401727
RBBP4	0.749765	8.75047e-09		RXRB	0.642967	5.78333e-05
RBBP5	0.252646	0.000200724		RYBP	1.3603	0.00284974
RBBP7	-0.180506	0.266915		SAFB	1.79265	5.13232e-06
RBFOX2	0.706284	0.000965386		SAFB2	1.85221	4.59748e-07
RBM14	0.5167	7.05818e-07		SAP130	3.27711	3.6609e-08
RBM15	0.303421	0.000475828		SAP18	-2.2667	8.98827e-10
RBM15B	-0.828815	0.00700899		SAP30	4.42813	2.21911e-09
RBM39	0.25871	0.000524534		SAP30BP	1.26407	0.00257657
RBMX	-2.03416	1.6868e-12		SAP30L	2.128	0.000282901
RBPJ	2.03505	3.1533e-07		SENP1	2.74178	8.22544e-11
RBX1	-2.06277	3.36207e-07		SETD1A	3.86919	0.0125627
RCOR1	0.269941	0.0802251		SF1	-0.389681	0.000224719
RCOR3	1.54395	6.27795e-05		SFPQ	0.576148	4.38974e-07
RECQL5	-0.898478	0.0225259		SGF29	0.418847	0.00217736
REPIN1	0.00799999	0.97281		SIN3A	1.77232	7.16825e-08
REXO4	0.956577	1.72631e-05		SIRT6	-1.48634	0.00851448
RFX1	3.41353	4.67502e-07		SIRT7	4.86698	1.45088e-08
RFX5	1.68403	0.0386032		SIX2	5.41224	3.32335e-11
RING1	0.850404	1.79779e-05		SLTM	4.85952	6.9828e-10
RNF2	0.164338	0.147133		SMARCA1	-2.33309	1.99725e-06
RNF20	0.83528	0.215436		SMARCA4	2.76171	4.15206e-07
RPRD1B	0.00490249	0.956869		SMARCA5	-0.57544	7.32993e-08
RREB1	-1.02394	0.136681		SMARCB1	0.650399	0.00224412
RUNX1	1.12026	5.64792e-07		SMARCC1	-2.77414	1.83228e-11
RUNX2	5.81858	2.39649e-10		SMARCC2	0.645946	0.13187
RUNX3	1.07947	0.0117332		SMARCD1	-0.32727	0.0276127
RXRB	0.1153	0.641873		SMARCD2	0.646181	0.00769742
RYBP	0.775312	0.50904		SMARCD3	-3.44359	0.166647
SAFB	1.95894	1.80737e-09		SMARCE1	0.805311	0.00162065
SAFB2	1.76485	4.75251e-09		SMYD3	-2.8511	5.48778e-09
SAP130	3.11653	4.9136e-11		SNAI1	-0.13922	0.616299
SAP18	-1.51845	2.67928e-07		SNIP1	-0.561539	0.411195
SAP30	1.478	4.52329e-07		SNW1	-0.766346	6.0507e-05
SAP30BP	1.37045	6.15405e-05		SON	-0.460538	0.000161483
SAP30L	-1.61168	0.000302611		SP1	-0.528559	0.0238563
SENP1	3.48608	1.99662e-10		SP2	2.36358	1.52878e-09
SETD1A	3.92362	6.9123e-10		SP3	-0.0427374	0.674636
SF1	1.53651	2.91586e-09		SPEN	-1.21741	0.000577045
SFPQ	0.352445	1.54516e-07		SRCAP	-2.15125	0.285354
SGF29	1.00666	4.04127e-06		SRFBP1	-0.353386	0.0406655
SIN3A	1.17827	4.09452e-12		SRSF2	-0.529509	0.000412327
SIN3B	2.79783	1.44886e-08		SSBP3	2.81709	0.000321452
SIRT6	-0.546634	0.58393		SUB1	-0.946075	7.80289e-10
SIRT7	4.30102	2.93802e-06		SUPT16H	-1.50351	0.00371083
SIX2	5.57399	4.40423e-06		SUPT20H	3.55538	2.91955e-10
SLTM	3.64164	3.98583e-12		SUPT3H	-0.868533	0.000652697
SMARCA1	-1.42007	0.000841614		SUPT7L	3.11438	7.64494e-08
SMARCA4	4.49975	4.69097e-12		SUZ12	-1.75067	2.88396e-11
SMARCA5	0.720085	8.73885e-06		TADA1	-0.132046	0.18252
SMARCB1	2.15566	3.47991e-06		TADA2B	1.69784	1.07337e-08
SMARCC1	-1.29533	1.12196e-06		TADA3	-3.03239	4.15571e-05
SMARCC2	2.45835	9.60433e-10		TAF1	3.51047	4.67428e-09
SMARCD1	1.28789	4.59425e-07		TAF10	1.50843	7.09917e-11
SMARCD2	3.11224	4.05457e-08		TAF11	0.131581	0.292919
SMARCD3	-1.01316	0.133465		TAF13	3.12571	0.00032591
SMARCE1	2.8165	2.34129e-10		TAF15	-0.268685	0.245825
SMYD3	-6.05552	0.306014		TAF3	3.46823	2.31023e-07
SNAI1	0.806959	0.0166179		TAF4	-0.828221	3.42986e-10
SNIP1	-1.9977	0.288435		TAF4B	-1.26162	1.38004e-07
SNW1	-1.08255	1.00695e-05		TAF5	-3.3949	4.531e-14
SON	-0.707167	0.00555688		TAF5L	3.24042	5.13499e-09
SP1	-0.378718	0.00375		TAF6	0.0603844	0.0292104
SP2	2.66476	1.46231e-08		TAF6L	2.65407	2.22377e-07
SP3	-0.654106	0.00301367		TAF7	4.16243	1.08724e-16
SPEN	-0.117831	0.154276		TAF8	0.378932	5.99256e-08
SRCAP	-2.87768	1.17446e-05		TAF9	-0.218672	0.000405646
SRFBP1	0.339801	0.0675741		TAF9B	0.355448	9.73168e-07
SRSF2	-0.222466	0.077976		TBL1X	0.34077	0.264505
SSBP3	3.26563	0.00822391		TBL1XR1	1.1327	5.81811e-05
SUB1	-1.02227	0.000842281		TBP	0.856003	6.23748e-07
SUPT16H	1.6688	0.0606355		TBPL1	0.14504	0.45468
SUPT20H	4.4448	1.35796e-10		TBX3	2.50849	3.0661e-09
SUPT3H	-0.877844	0.000463923		TCEA1	-0.115934	0.795535
SUPT7L	3.61687	8.34712e-06		TCERG1	0.0562806	0.659112
SUZ12	-0.769209	0.00339094		TCF7L2	5.14867	9.06455e-12
TADA1	-0.446914	0.00418654		TDP2	1.33222	0.259353
TADA2A	0.684284	0.0122012		TEAD1	2.76141	1.60321e-08
TADA2B	1.53235	2.65521e-07		TERF2	1.01881	0.000576864
TADA3	-1.67215	0.000320509		TERF2IP	-0.211103	0.564115
TAF1	4.5714	2.92322e-07		TFAP2A	-0.382536	3.57023e-06
TAF10	1.45245	2.0435e-05		TFAP2C	-0.82931	2.2607e-06
TAF11	0.969867	0.000409717		TFDP1	0.346642	0.00648434
TAF13	3.82622	0.000561687		TGIF1	0.272862	0.0364562
TAF15	-0.942724	0.00123718		THAP11	1.01421	1.71347e-08
TAF3	4.75432	2.96187e-05		THAP3	3.9324	1.92493e-06
TAF4	0.861215	9.7721e-08		THOC5	1.98191	1.88747e-05
TAF4B	-0.799136	0.000127372		THRAP3	0.312694	0.00477775
TAF5	-2.37435	3.95302e-09		THYN1	-0.442241	0.0029236
TAF5L	2.89834	4.99786e-13		TOP1	0.123789	3.0517e-06
TAF6	0.82879	2.55355e-07		TOX4	-1.02645	3.98761e-06
TAF6L	2.9866	7.09696e-11		TP53BP1	2.98758	0.0119987
TAF7	4.87524	1.63212e-07		TPR	2.55213	0.00539335
TAF8	1.62889	3.69269e-10		TRIM27	0.857622	0.263549
TAF9	-1.00485	6.45184e-06		TRIM28	-2.72361	1.93681e-10
TAF9B	0.492679	1.8138e-06		TRIP13	0.61545	0.143203
TBL1X	1.99417	1.60705e-09		TRPS1	3.6744	4.21832e-07
TBL1XR1	3.12511	3.46224e-09		TRRAP	2.1529	6.18613e-06
TBP	1.5177	5.02708e-06		TTF1	-1.71815	4.10293e-13
TBPL1	0.488478	0.22532		TWIST2	3.89256	3.49675e-11
TBX3	2.69945	1.7547e-06		UBTF	-1.96112	1.28387e-08
TCEA1	0.166102	0.413182		USF1	-0.439639	8.78156e-06
TCERG1	-0.0982851	0.0608373		USF2	0.464881	7.60234e-07
TCF7L2	3.9788	1.47024e-06		UTP4	1.56186	0.252618
TDP2	0.692314	0.00277083		VEZF1	4.79826	1.69261e-10
TEAD1	3.14185	0.0036524		WDR5	1.16457	3.03081e-07
TERF2	0.697483	0.160199		WIZ	-2.91068	1.18932e-08
TERF2IP	-1.42308	0.206345		XRCC6	0.381943	1.38839e-09
TFAP2A	-0.0510025	0.694965		XRN2	0.344442	0.00159024
TFAP2C	0.109816	0.903847		YAF2	0.185693	0.388718
TFDP1	0.298136	0.212678		YEATS2	0.10485	0.680222
TGIF1	2.55206	0.167828		YEATS4	0.222021	0.456202
THAP11	0.372753	0.0412515		YY1	0.751839	4.39789e-09
THAP3	5.03668	1.432e-05		ZBTB11	-2.12896	5.64717e-05
THOC5	2.66773	0.000831877		ZBTB21	-2.0196	2.52864e-08
THRAP3	1.38315	2.15681e-09		ZBTB24	-0.422095	0.00683333
THYN1	-0.508787	0.0374001		ZBTB43	2.82844	3.4976e-06
TOP1	0.467303	1.45874e-05		ZBTB7A	4.50376	3.96432e-09
TOX4	0.153081	0.245251		ZFP64	1.79619	5.374e-07
TP53BP1	4.13845	0.0586891		ZFP91	5.69214	1.35405e-09
TPR	1.76567	0.000287298		ZFX	-0.965922	1.62763e-05
TRIM27	1.43938	0.0013705		ZHX2	0.609878	0.629554
TRIM28	-1.57802	3.60143e-08		ZKSCAN1	0.191354	0.141054
TRIP13	-0.515781	0.643167		ZKSCAN8	5.0028	0.00550769
TRPS1	4.28057	0.00176035		ZMYND11	-0.166576	0.403008
TRRAP	2.98754	9.55834e-15		ZMYND8	0.095268	0.544362
TTF1	-1.79047	0.000580987		ZNF131	2.58923	7.49644e-10
TWIST2	4.2448	1.52388e-05		ZNF143	3.5652	2.27053e-09
UBTF	-1.66903	6.26722e-07		ZNF146	0.982992	6.63469e-05
USF1	-1.15622	0.168022		ZNF148	-1.22908	5.15466e-08
USF2	-0.198064	0.695087		ZNF174	4.00925	3.80394e-09
UTP4	-0.481892	0.254943		ZNF207	1.22282	2.72462e-07
VEZF1	4.76333	7.52787e-11		ZNF24	-0.915515	0.00243862
WDR5	0.509298	8.53703e-05		ZNF281	3.16032	2.28904e-09
WIZ	-2.49481	2.68989e-05		ZNF326	1.18988	1.62638e-08
XRCC6	1.4813	4.28862e-09		ZNF362	-0.749593	3.77486e-06
XRN2	0.36524	0.000471691		ZNF384	4.19432	2.56592e-07
YAF2	0.937979	0.189584		ZNF444	-0.767025	0.563751
YEATS2	-0.1762	0.32574		ZNF512	-0.221212	0.0501173
YEATS4	0.184536	0.0372037		ZNF512B	3.49863	6.26429e-10
YY1	0.430091	0.00207042		ZNF524	4.65725	1.39238e-05
ZBTB11	-0.708231	0.368472		ZNF579	2.65311	1.6977e-08
ZBTB21	-2.85779	0.000478195		ZNF592	3.13817	2.27974e-06
ZBTB24	0.654202	0.00068047		ZNF593	-1.06738	1.48202e-10
ZBTB43	3.24964	9.43284e-09		ZNF638	-0.795784	1.05161e-05
ZBTB7A	3.01273	0.00142716		ZNF639	3.86431	0.000111779
ZFP64	1.58695	3.50042e-06		ZNF668	0.268919	2.9614e-05
ZFP91	5.14579	2.12982e-06		ZNF687	-4.37388	5.95543e-07
ZFX	-0.978595	0.0117585		ZNF740	-0.0959529	0.0849949
ZHX1	3.42583	7.34934e-06		ZNF768	3.96672	2.77299e-13
ZHX2	1.82064	1.63377e-06		ZNF787	0.0432688	0.941874
ZHX3	5.80699	5.40182e-09		ZSCAN25	2.71575	7.69064e-07
ZKSCAN1	0.616686	0.145525		ZSCAN26	-1.9477	0.000606439
ZKSCAN8	3.74181	0.00357984		TMPO	-0.384966	1.24971e-06
ZMYND11	-0.559694	0.033156		AAAS	-0.0474576	0.962007
ZMYND8	0.347684	0.000143352		ABHD14B	0.0444587	0.970973
ZNF131	1.77302	0.000319815		ACIN1	0.183764	0.213098
ZNF143	3.28583	2.59795e-13		ACP1	1.75474	0.0360638
ZNF146	0.149009	0.517261		ACSL3	-2.00343	5.21167e-06
ZNF148	-2.08399	4.18888e-07		ACYP2	1.25566	0.482438
ZNF174	4.23849	0.000545028		ADAR	-0.174079	0.00918225
ZNF207	0.269867	1.00118e-06		AFG2B	3.3457	0.00150216
ZNF24	-1.02574	0.0122109		AK6	3.00881	1.07924e-05
ZNF281	3.35524	2.21904e-11		AKAP8	1.65625	0.0641923
ZNF326	0.152678	0.133908		AKAP8L	-0.999599	0.0184045
ZNF362	-0.660337	2.24168e-05		ALDOC	-1.76234	0.0110049
ZNF384	3.98063	1.74521e-05		AMMECR1	3.1487	0.111985
ZNF444	0.62797	0.299156		AMZ2	3.95301	8.34747e-05
ZNF512	0.688873	0.37011		ANAPC10	0.517289	0.290991
ZNF512B	4.12606	4.0433e-09		ANLN	-0.441775	0.0208626
ZNF524	3.91581	0.00191599		ANXA11	0.117581	0.836044
ZNF579	2.0127	0.00932327		ANXA5	1.47766	0.000463225
ZNF592	4.08421	7.01688e-08		API5	1.28124	1.32755e-10
ZNF593	-1.82018	2.19384e-07		APOBEC3B	1.4662	2.95736e-07
ZNF609	5.1085	6.77023e-08		APTX	1.09889	1.89254e-07
ZNF638	-1.11946	7.38058e-09		AQR	4.76789	7.52356e-09
ZNF639	3.31985	0.000169229		ARB2A	-1.4824	0.0780297
ZNF668	0.235224	0.0193464		ARIH1	-0.654411	0.453311
ZNF687	-4.28285	9.07794e-12		ARL6IP6	-2.03001	6.99981e-06
ZNF740	-0.887879	0.000760895		ARPC2	0.759807	1.36654e-05
ZNF768	3.277	3.10824e-06		ARPC3	1.89741	8.61857e-06
ZNF787	-3.33853	0.14058		ASXL2	4.24041	1.8164e-07
ZSCAN25	0.867893	0.293185		ATAD1	5.32281	0.34292
ZSCAN26	-1.95911	0.000430931		ATAD5	-2.03076	7.34782e-06
TMPO	-0.741636	4.15924e-07		ATP6V1C1	-2.14811	0.126186
AAAS	0.138907	0.222982		ATP6V1G1	-0.0786379	0.573318
ABHD14B	-6.14103	0.304932		AUP1	-0.092884	0.780348
ACIN1	0.906375	0.000101648		BAG1	-0.305303	0.560517
ACP1	-0.759409	0.536274		BANF1	-0.476214	0.0350644
ACSL3	-1.54618	8.05634e-07		BAP1	4.38942	2.37801e-08
ACYP2	-2.35434	0.160533		BCCIP	-0.198958	0.708902
ADAR	-0.806082	1.53815e-06		BCL2L2	4.97467	0.0119253
AFG2B	3.32956	3.58352e-06		BCL7B	0.449327	0.341347
AK6	2.29207	0.0393038		BCL7C	1.45907	1.21028e-07
AKAP8	3.65345	2.71331e-06		BICRAL	0.989251	0.000758256
AKAP8L	0.00123765	0.99561		BMAL1	5.08125	1.88565e-15
ALDOC	-5.73511	0.100754		BOD1L1	-0.679408	0.667543
ALKBH2	4.93069	0.0170808		BOP1	3.63744	2.79637e-05
AMMECR1	2.76477	0.249172		BPNT1	-2.37481	0.144371
AMZ2	4.08878	1.71718e-08		BRK1	2.0897	0.221775
ANAPC10	-0.463257	0.051368		BUB3	-0.121849	0.0266367
ANAPC15	4.34818	0.0188402		BUD23	-1.72147	0.00897586
ANAPC5	6.18451	0.00642374		C11orf54	-0.401361	0.173474
ANKRD17	3.67829	4.92728e-09		C16orf87	0.464072	0.0142767
ANLN	-0.783147	0.00923198		C17orf49	2.06665	1.55627e-08
ANXA11	0.915994	0.0353551		C18orf21	-0.330068	0.0672029
ANXA5	1.5511	5.23501e-09		C19orf47	1.00462	1.49846e-05
API5	0.676073	1.64538e-06		C19orf53	-0.424695	1.65001e-05
APOBEC3B	1.76019	0.00981532		C1orf174	1.99494	6.16195e-06
APTX	-0.79979	0.0617802		C1orf35	-0.47829	1.96637e-07
AQR	5.84533	0.0214501		C2orf49	0.146054	0.81576
ARB2A	2.30287	0.325725		C7orf50	0.837159	0.000433361
ARIH1	2.09635	0.29521		C8orf33	1.13128	1.65621e-05
ARL6IP6	-1.74357	4.01252e-07		C8orf82	-1.35951	0.326875
ARPC2	0.828273	0.00182468		C9orf78	0.657729	0.723473
ARPC3	0.615721	0.00145169		CAPG	-0.267536	0.753194
ASXL2	4.12277	1.58284e-07		CBLL1	-0.485919	0.467668
ATAD1	-1.60315	0.000409662		CBR1	-0.335299	0.351461
ATAD5	-1.70029	0.0520013		CBX1	0.493656	0.687428
ATP6V1C1	0.804309	0.44705		CCDC12	-0.806846	0.344308
ATP6V1G1	-1.15665	0.0147944		CCDC127	-3.20979	6.64332e-06
ATXN1	2.37247	5.98893e-06		CCDC77	-0.784831	0.0298802
AUP1	0.0539828	0.646695		CD2BP2	-0.507308	0.0298858
BAG1	0.535713	0.0633161		CD70	0.634899	0.0415189
BANF1	3.01041	3.04729e-05		CDC27	1.02077	3.17215e-05
BAP1	4.54919	1.59068e-11		CDC40	4.72818	5.98178e-05
BCCIP	-3.33985	0.207889		CDCA2	0.517545	6.94241e-05
BCL2L2	3.68147	0.0154352		CDCA5	1.38209	1.87525e-06
BCL7A	10.0756	0.0389161		CDCA7L	3.59805	2.01069e-08
BCL7B	-1.86993	1.14009e-08		CDCA8	0.0321128	0.735532
BCL7C	2.42059	0.00204097		CDIPT	-2.66353	0.00476463
BICRAL	0.382093	0.52003		CDK2AP1	2.01759	0.0382747
BMAL1	5.49429	1.09103e-05		CDKN2AIP	-0.412451	0.544602
BOD1L1	-1.42988	0.000881415		CELF1	1.41446	7.28384e-07
BOP1	3.40102	2.02534e-05		CENATAC	1.36718	9.49282e-05
BPNT1	-7.29663	0.337519		CENPV	2.11385	3.03962e-14
BRK1	-3.73256	0.0686911		CFAP20	0.446452	0.0191803
BUB3	-1.40461	2.08751e-11		CHAF1A	0.195723	0.258729
BUD23	-0.784548	0.0491942		CHAMP1	2.56782	0.00961216
C11orf54	0.309947	0.442515		CIRBP	-0.355505	0.00412102
C16orf87	-0.718383	0.495149		CMPK1	-1.57582	0.0787153
C17orf49	1.7355	0.000111452		CMSS1	-0.101873	0.626429
C18orf21	-1.81512	0.0160314		COIL	0.331626	0.0102975
C19orf47	0.893728	0.315487		COPS3	-0.475776	0.333508
C19orf53	0.533537	0.018028		COPS4	0.117555	0.722285
ATM	0.42769	0.0145255		COPS6	-0.452083	0.619394
C1orf174	1.02539	0.000523437		COPS7A	-0.32082	0.693709
C1orf35	-2.82462	0.0315916		COPS8	1.66506	0.0390974
C2orf42	2.27266	0.0020504		CPA4	-4.58186	6.86923e-08
C2orf49	0.0404244	0.831521		CPS1	5.09646	0.0011234
C7orf50	1.16912	0.002894		CPSF1	2.59199	1.98389e-06
C8orf33	0.254933	0.676278		CPSF2	0.711882	0.000101284
C8orf82	-3.26941	0.316635		CPSF4	0.691415	0.000798971
C9orf78	-0.619321	0.616284		CPSF6	1.00692	8.58253e-05
CAPG	-2.56216	0.000249784		CPSF7	0.857867	1.13588e-05
CBLL1	3.19774	0.117599		CRIP2	-0.254043	0.148837
CBR1	-1.57033	0.108076		CSE1L	-0.727161	0.0225698
CBX1	-1.46786	0.520065		CSNK1D	0.716142	6.04797e-06
CCDC12	2.76835	0.00263665		CSTF1	1.18674	1.0212e-07
CCDC127	-3.24425	7.10461e-07		CSTF2	0.106686	0.261203
CCDC77	-0.522943	0.0291602		CSTF3	1.45608	1.17534e-07
CD2BP2	1.15754	0.126859		CTDSPL2	2.79528	0.258546
CD70	-0.830062	4.32205e-08		CTNNBL1	1.67685	0.000109171
CDC27	0.788392	5.37489e-05		CUL1	1.49691	4.57215e-09
CDC40	6.48113	4.36016e-05		CUL4A	-2.35598	6.85355e-09
CDCA2	0.309328	0.088991		CUL4B	1.40015	5.62346e-11
CDCA5	1.03274	0.000146763		CWC15	1.01336	0.101302
CDCA7L	3.02884	0.00388852		CWC25	2.09813	4.17456e-09
CDCA8	-0.125406	0.800892		CYRIB	2.92531	0.07774
CDIPT	-2.9734	3.35019e-09		DAZAP1	0.536417	0.00413164
CDK2AP1	-0.323992	0.750284		DCAF13	0.00397146	0.959827
CDKN2AIP	-0.0244881	0.887422		DCAF7	-0.360038	0.481826
CELF1	-0.0786919	0.604047		DCAKD	-0.876363	0.0431332
CENATAC	0.889036	0.00219021		DCPS	-2.51663	2.49218e-05
CENPV	0.048528	0.569137		DCTN5	-1.77933	1.78707e-05
CFAP20	-0.567478	5.17698e-05		DCUN1D1	0.799743	0.365981
CHAF1A	1.23625	0.215998		DCUN1D5	0.588766	4.24225e-05
CHAMP1	3.3154	2.51341e-09		DDB1	-2.65164	1.29373e-15
CIRBP	-1.2282	1.30953e-07		DDX10	-2.77552	2.6966e-13
CLDND1	-4.10268	5.09527e-08		DDX19A	0.0856755	0.832597
CLN3	2.8855	0.000250322		DDX19B	-1.41335	0.1256
CMPK1	-1.53446	0.136755		DDX23	-0.813851	2.88139e-06
CMSS1	-0.186829	0.0921278		DDX27	-5.36501	3.12197e-15
COIL	-0.117755	0.747644		DDX31	-0.92636	3.62435e-10
COPS3	0.179326	0.606867		DDX39A	0.889159	0.000462684
COPS4	-2.98266	0.271072		DDX41	-2.28269	7.98082e-15
COPS6	-0.891377	0.447538		DDX42	-0.344846	0.00353025
COPS7A	-0.465787	0.68662		DDX47	0.637686	7.22037e-06
COPS8	0.378702	0.691882		DDX50	4.55475	5.03186e-08
CPA4	-2.97277	9.17459e-15		DDX51	-0.624714	2.09648e-06
CPNE1	4.57328	0.00338514		DDX52	0.0573087	0.352833
CPS1	3.30844	4.8355e-07		DDX55	-0.749993	6.93061e-10
CPSF1	2.59427	7.76696e-07		DDX56	-0.249548	0.000773764
CPSF2	0.201066	0.204471		DEF6	-3.0098	0.216953
CPSF4	0.399247	0.0546736		DHX15	0.596815	3.75194e-09
CPSF6	0.485629	0.347219		DHX37	-0.106343	0.00922252
CPSF7	0.80311	7.3208e-05		DHX40	0.732743	0.268423
CRIP2	1.47648	1.70867e-05		DHX8	4.14716	5.03824e-09
CSE1L	-0.371121	0.008068		DIDO1	-2.30627	4.35784e-07
CSNK1D	0.284344	0.00251286		DIMT1	1.01609	1.08382e-13
CSTF1	0.942071	0.000977336		DKC1	0.616626	2.03549e-09
CSTF2	-0.0281108	0.815365		DLST	-2.22258	0.128364
CSTF3	0.916498	0.00765217		DNAJB4	-1.01316	0.222881
CTDSPL2	-0.759373	0.245642		DNAJB6	-0.0235366	0.797457
CTNNBL1	2.1563	0.000204511		DNAJC17	-0.70296	0.33812
CUL1	1.7232	1.33867e-06		DNAJC25	-2.03915	0.000129491
CUL4A	-3.65721	0.157614		DNAJC7	-1.56951	0.37303
CUL4B	1.22273	0.207314		DNAJC8	-0.0786678	0.512055
CWC15	2.02256	0.0488747		DNAJC9	0.192675	0.00966837
CWC25	2.31574	0.356723		DNPH1	-0.525431	0.338266
CYRIB	-2.3562	1.82114e-07		DPCD	-0.494812	0.813395
DAZAP1	-0.0261931	0.89275		DRG1	0.910198	0.000192964
DCAF13	-0.946667	3.33567e-08		DSN1	1.20642	0.272655
DCAF7	0.748543	0.0125292		DUSP11	1.50065	8.39464e-10
DCAKD	-0.720299	0.00064934		DUSP23	0.0549291	0.907555
DCPS	-5.25717	0.208243		DUT	0.104667	0.831794
DCTN5	-2.0608	2.50358e-07		DYNLT1	2.79119	0.155927
DCUN1D1	3.02873	0.362682		EBNA1BP2	-1.0848	6.41602e-13
DCUN1D5	-0.0956286	0.740206		EEF1D	0.936616	6.40048e-09
DDB1	-2.1912	4.09396e-09		EFTUD2	-0.367911	4.54757e-05
DDX10	-2.95703	1.10872e-11		EIF3L	-1.93238	0.237784
DDX19A	0.191446	0.665507		EIF4A3	0.437061	3.92771e-05
DDX19B	-0.611241	0.00319312		EIF6	0.547406	2.36764e-07
DDX23	-1.13242	5.34372e-08		ELAVL1	0.379495	5.27819e-06
DDX27	-5.6969	2.00381e-10		EMD	-0.400043	5.98049e-05
DDX31	-1.49858	3.8058e-09		EME1	3.0751	3.94765e-09
DDX39A	0.604208	0.0172373		EMG1	-0.109902	0.0922902
DDX41	-2.09044	1.80332e-09		ENSA	0.318666	0.826795
DDX42	0.115471	0.662774		EPOP	-0.320728	0.574814
DDX47	-0.180562	0.00504269		ERCC1	-2.59633	0.247578
DDX50	4.23607	3.69827e-13		ERGIC1	0.645376	0.000588491
DDX51	-1.17448	3.18746e-09		ERH	-0.153105	0.00403173
DDX52	-1.06162	2.96094e-07		EXOSC1	0.973313	2.17362e-05
DDX55	-0.791874	7.99357e-06		EXOSC10	0.351988	0.00215604
DDX56	0.517553	0.0391242		EXOSC2	0.953584	4.95034e-05
DEF6	-1.41022	8.82676e-10		EXOSC3	0.392062	0.00809687
DHX15	0.306044	8.93219e-05		EXOSC5	1.92212	1.68462e-06
DHX37	0.565408	0.129357		EXOSC7	-0.628204	0.000191346
DHX40	-0.684563	0.259227		EXOSC9	0.385578	0.0339323
DHX8	2.97212	5.26272e-06		FAM32A	0.318156	0.00384061
DIDO1	-3.16427	1.42273e-10		FAM50A	-0.449678	0.654102
DIMT1	-0.425838	0.000251889		FAM76B	0.903582	0.472597
DKC1	0.592675	1.41427e-05		FAM98B	0.344804	0.225315
DLST	0.16069	0.798781		FANCD2	3.33501	8.64544e-05
DNAJB4	1.22195	0.0401771		FANCL	1.06464	0.185535
DNAJB6	0.014499	0.885473		FARSB	1.61394	5.56134e-07
DNAJC17	-0.383729	0.72326		FBL	0.436817	2.08619e-06
DNAJC25	-1.51883	0.000202815		FBXL18	-2.22741	0.0765492
DNAJC7	-2.81271	0.0939356		FBXL6	1.24269	4.80123e-09
DNAJC8	-0.0480779	0.633681		FBXO11	4.92644	9.4634e-06
DNAJC9	-0.10612	0.602072		FCF1	-0.307563	0.000100203
DNPH1	-2.955	0.13249		FEN1	1.02344	6.03276e-06
DPCD	-1.60416	3.99045e-06		FIP1L1	-0.340668	0.00168737
DRG1	0.726396	0.000330516		FKBP5	3.85155	0.341534
DSN1	-2.30324	0.270296		FLYWCH1	-4.24637	4.1744e-12
DUSP11	1.23844	1.24755e-06		FLYWCH2	0.0528215	0.677451
DUSP23	0.918792	0.462015		FTSJ3	-0.763692	9.07779e-12
DUT	1.38953	0.0404266		FUBP1	0.86411	1.50715e-09
DYNLT1	3.45207	0.194304		FUBP3	0.58849	8.68437e-07
EBNA1BP2	-0.319566	0.00296433		FYTTD1	0.644966	5.16261e-11
EEF1D	0.329273	0.012689		GAPDHS	4.96306	3.16578e-08
EFTUD2	-0.0887484	0.456754		GAR1	1.54735	4.21109e-15
EIF3L	0.458518	0.426583		GDPD3	-3.79027	1.36837e-10
EIF4A3	0.185002	0.0136105		GEMIN2	0.29258	0.346221
EIF6	0.0989833	0.403636		GET3	-0.168431	0.854375
ELAVL1	-0.684943	2.10496e-05		GLE1	-0.907915	0.00132671
EMD	-0.652512	5.27166e-07		GLYR1	-0.179542	0.0398179
EME1	2.47614	1.23172e-07		GNL2	1.0831	7.11702e-12
EMG1	-0.909938	4.16935e-07		GNL3L	-0.4162	1.05179e-06
ENSA	1.44543	0.0516181		GPATCH11	1.88945	0.00116308
EPOP	-2.98646	0.00749903		GPKOW	0.389264	0.603287
ERCC1	-1.00585	0.544375		GPS1	-1.1613	0.0985667
ERGIC1	-0.190731	0.10385		GRB2	2.00415	0.0121107
ERH	-0.838487	1.85856e-05		GRWD1	0.675208	0.00272633
EXOSC1	0.307644	0.0549446		GSK3A	1.54711	0.0335056
EXOSC10	0.81441	2.90612e-06		GSS	-0.774581	5.99446e-05
EXOSC2	0.739344	2.32635e-05		GTF2E2	-3.51922	0.359035
EXOSC3	0.169218	0.269756		GTF2F2	0.086541	0.894326
EXOSC5	0.734967	0.0185118		GTF3C1	-2.18748	1.43348e-05
EXOSC7	0.132966	0.613506		GTF3C2	4.77471	9.11485e-11
EXOSC9	0.084785	0.459884		GTF3C3	-0.438234	0.000131799
FAM32A	0.142398	0.920933		GTF3C4	0.277575	0.0318532
FAM50A	-0.878216	0.420456		GTF3C5	0.677913	4.43817e-06
FAM76B	-1.19389	0.196191		GTPBP4	2.29153	6.40208e-17
FAM98B	0.814297	1.20575e-06		H1-0	-0.338584	4.66116e-07
FANCD2	3.13817	1.18088e-05		H1-1	-1.4553	1.25732e-09
FANCI	0.635282	0.233614		H1-10	0.37006	3.50614e-05
FANCL	1.17536	0.194777		H1-2	-1.0207	1.2319e-08
FARSB	1.11874	0.0496056		H1-4	0.2529	3.29004e-05
FBL	-0.180353	0.071915		H1-5	-0.502085	1.852e-06
FBXL18	-4.84237	0.233211		HDGFL3	-1.21924	0.140092
FBXL6	0.854115	0.000138396		HEATR3	2.90258	0.0527066
FBXO11	5.33448	4.79358e-08		HMCES	0.958719	3.54661e-07
FCF1	-0.94437	1.58559e-05		HMGN1	-1.73597	1.80125e-06
FEN1	1.12479	0.00118435		HMGN2	0.741522	1.45503e-05
FIP1L1	-0.487166	0.0222683		HMGN3	0.550887	1.86105e-06
FKBP5	1.74727	0.0238346		HMGN4	0.62451	4.4162e-05
FLYWCH1	-4.31043	2.0584e-12		HMGN5	1.51592	0.00653288
FLYWCH2	0.551104	0.0935337		HNRNPA0	0.171366	0.0325601
FTSJ3	-1.3905	1.99342e-07		HNRNPA1	0.786782	0.0011902
FUBP1	0.471699	0.000983008		HNRNPA1L2	1.55251	2.47101e-13
FUBP3	-0.146274	0.0314649		HNRNPA2B1	-0.168075	0.000503234
FYTTD1	-0.177591	0.0166192		HNRNPA3	1.31529	1.16682e-12
GAPDHS	6.69268	1.20084e-05		HNRNPAB	-0.426089	0.00122761
GAR1	0.989338	6.31921e-09		HNRNPDL	0.705405	1.25143e-09
GDPD3	-1.55249	2.50595e-05		HNRNPF	1.10618	1.31586e-08
GEMIN2	-0.771811	0.0951383		HNRNPH1	1.7504	3.79699e-12
GET3	-2.32808	0.0178738		HNRNPH2	0.460668	0.000184715
GLE1	-0.522725	0.00221453		HNRNPH3	0.357205	2.1009e-05
GLYR1	-0.985577	7.53936e-08		HNRNPL	1.21552	2.05782e-13
GNL2	0.405025	4.90743e-06		HNRNPLL	-0.44461	0.308892
GNL3L	-0.59044	3.70573e-08		HNRNPM	-0.032415	0.0871598
GPATCH11	3.4474	0.113442		HNRNPR	0.868052	1.23224e-10
GPKOW	2.28635	0.289118		HNRNPUL1	3.3117	5.60994e-09
GPS1	-2.46098	0.291488		HNRNPUL2	-3.09275	1.18594e-14
GRB2	-1.16441	0.518672		HP1BP3	1.57776	4.80915e-13
GRWD1	0.650591	0.0852751		HUS1	-0.510542	0.0211262
GSK3A	0.0377899	0.874341		HYPK	-0.87918	0.000156545
GSS	0.934825	0.000236308		IFI16	-0.277935	2.02505e-05
GTF2E2	0.932604	0.503271		IK	3.90178	4.45883e-08
GTF2F2	2.11525	0.0917504		IMP3	1.33342	8.85549e-11
GTF3C1	-2.83253	1.0852e-06		IMP4	-1.19531	1.19129e-06
GTF3C2	5.52664	3.22289e-07		IMPA2	-2.00454	3.41744e-06
GTF3C3	-0.00265306	0.990023		INTS1	2.6804	5.0944e-06
GTF3C4	0.595936	5.94751e-05		INTS13	1.93958	5.75947e-06
GTF3C5	0.676529	0.000223527		INTS15	-5.27365	0.23528
GTPBP4	1.13774	2.91189e-08		INTS4	3.65079	6.59206e-05
H1-0	-1.70255	3.44747e-07		INTS5	4.51123	0.107027
H1-1	-1.89569	1.22053e-06		INTS6	-2.45433	3.16521e-09
H1-10	-1.40171	4.29921e-08		INTS7	3.02278	0.00616886
H1-2	-1.37913	7.67903e-08		INTS9	5.17602	0.139143
H1-4	-2.20851	5.11829e-06		IPO5	3.3895	5.52292e-07
H1-5	-1.07231	0.00187239		IPO8	-2.02009	9.62854e-05
HDGFL3	-2.8252	0.298661		ISG20L2	-0.0972308	0.0695291
HEATR3	1.0747	0.0281722		ISY1	-0.581455	0.206129
HMCES	3.43791	0.214053		IWS1	5.05942	0.000725053
HMGN1	-0.622922	2.26139e-07		KANSL1	1.91215	0.0888791
HMGN2	-0.0832579	0.171821		KAT7	-0.0784816	0.834913
HMGN3	0.137321	0.578773		KHDRBS1	-0.147943	0.0653831
HMGN4	-1.40902	4.97095e-07		KIF22	0.516532	4.85984e-06
HMGN5	2.46046	0.00262668		KIF23	3.15327	4.02973e-08
HNRNPA0	-0.932622	4.50673e-09		KIN	-2.64378	0.126358
HNRNPA1	-0.163718	0.128984		KNL1	5.12722	0.00157576
HNRNPA1L2	0.606123	1.66897e-06		KNOP1	-0.439697	3.50266e-09
HNRNPA2B1	-1.15876	1.81579e-09		KPNA1	0.974785	4.45505e-05
HNRNPA3	0.538734	2.19199e-05		KPNA2	0.880628	1.11042e-10
HNRNPAB	-0.0714659	0.271184		KPNA4	0.749329	0.00015802
HNRNPDL	0.172092	0.186308		KPNB1	-0.128661	0.100015
HNRNPF	0.405041	0.016222		KRI1	0.0343117	0.915932
HNRNPH1	0.828947	3.94801e-07		KRR1	1.01099	9.3745e-06
HNRNPH2	-0.522224	0.0499748		KRT77	-6.78929	2.40724e-14
HNRNPH3	-0.579048	1.69341e-06		LAS1L	0.712882	1.31812e-07
HNRNPL	0.319726	0.00164253		LBR	1.09461	2.15148e-09
HNRNPLL	1.11261	0.273164		LEMD2	-0.142103	0.0392586
HNRNPM	-0.2982	0.000535601		LEMD3	-1.37623	0.296686
HNRNPR	0.364079	6.41987e-07		LENG8	2.85453	0.000172797
HNRNPUL1	3.77185	1.17174e-06		LIG3	-0.128598	0.000504005
HNRNPUL2	-2.14989	8.87139e-14		LIN37	-0.494172	0.578168
HP1BP3	0.0258389	0.605585		LLPH	0.756327	5.31047e-08
HPSE	6.17304	3.55206e-05		LMNA	-0.0267482	0.317129
HUS1	-0.265889	0.121062		LMNB1	0.453001	2.2057e-06
HYPK	-1.1426	9.98308e-05		LMNB2	0.0247281	0.450861
IER2	-0.798979	0.01158		LRWD1	5.3612	2.24502e-07
IFI16	-0.461032	2.90234e-07		LSM10	9.26662	4.8117e-05
IK	3.14488	4.72781e-06		LSM11	3.37909	0.00530998
IMP3	1.8627	8.31878e-06		LSM2	-1.68772	0.00230244
IMP4	-1.23568	0.000183322		LSM3	0.69765	0.0507126
IMPA2	-0.573202	0.0138637		LSM7	0.325739	0.487219
ING2	4.66434	1.28312e-07		LSM8	-0.768023	0.211084
INIP	4.79576	5.89151e-05		LUC7L	0.311726	0.0324772
INTS1	2.89789	1.80041e-06		LUC7L2	0.234519	0.0301583
INTS13	2.18724	2.54658e-05		LUC7L3	0.600137	0.00439351
INTS15	-2.81493	0.00522551		LYRM4	-0.933533	0.00579715
INTS3	-0.686926	0.078748		MACROH2A1	-1.67948	6.78399e-07
INTS4	3.70433	8.01511e-07		MAD2L1	-1.45026	0.390991
INTS5	2.7505	2.92475e-06		MAEA	-0.323564	0.013657
INTS6	-2.64898	1.03395e-08		MAGOH	-3.41113	0.0088565
INTS7	2.15305	4.54431e-06		MAK16	1.49686	5.69625e-09
INTS9	1.8837	0.000288112		MAP2K6	-4.44729	0.356712
IPO5	4.27067	7.44061e-08		MAPK3	2.46138	0.188461
IPO8	-2.03806	1.39997e-05		MAT2A	-1.89338	8.13728e-05
ISG20L2	-0.948314	3.66024e-08		MATR3	1.09222	4.27004e-10
ISY1	1.65631	0.00756908		MBNL1	1.56371	5.57426e-07
IWS1	4.64947	0.0041214		MCM10	0.158318	0.380601
KANSL1	3.28489	1.67322e-11		MCM2	-1.1276	6.25686e-06
KANSL3	1.35083	0.000711538		MCM3	-0.303804	0.00124492
KAT7	0.176041	0.547665		MCM4	0.147053	0.560672
KHDRBS1	-0.737705	7.95423e-06		MCM5	-0.682784	0.000101586
KIF22	0.518053	0.000300187		MCM6	-1.42205	2.33438e-07
KIF23	3.42683	2.25777e-11		MCM7	-2.07238	8.41876e-08
KIN	-2.95607	0.256994		MDC1	0.200055	0.096171
KNL1	6.64055	0.00382204		METTL1	1.87132	0.143454
KNOP1	0.237554	0.051967		MFAP1	-0.342054	0.00424167
KPNA1	1.42344	4.64274e-08		MGMT	-0.604327	2.18326e-05
KPNA2	0.435016	0.000108664		MGST3	1.9001	1.02123e-08
KPNA4	1.1093	4.66788e-05		MIDEAS	1.64549	0.0064363
KPNB1	-0.928696	1.53226e-07		MKI67	-1.67391	2.4272e-10
KRI1	0.815794	0.00132257		MLH1	1.97974	0.000861879
KRR1	1.31696	4.32197e-06		MPG	1.45325	8.36946e-14
KRT77	-2.61041	6.69675e-12		MPHOSPH10	2.00957	2.66662e-11
L1CAM	2.09276	0.00165804		MRE11	1.09158	2.24924e-09
LAS1L	0.115052	0.0532426		MRTO4	0.0826926	0.532061
LBR	0.581843	8.98566e-07		MSH2	0.252097	5.26782e-06
LEMD2	-0.290269	1.85188e-05		MSH3	-4.31146	1.9071e-12
LEMD3	-2.64214	9.79806e-05		MSH6	-0.692468	9.95627e-07
LENG8	1.77744	0.0654671		MSL1	3.46863	0.0199447
LIG3	-0.123085	0.378521		MTREX	1.08153	2.38389e-08
LIN37	-1.25013	1.47988e-06		MUS81	2.53215	3.78683e-10
LLPH	-0.194419	0.369167		MYADM	8.14196	1.11685e-05
LMNA	-0.394037	3.27199e-07		MYO1C	1.81041	0.00691151
LMNB1	0.598091	1.43151e-06		MYPN	0.409687	0.274494
LMNB2	0.0692027	0.114821		NAA40	-0.757193	0.565222
LRRC41	3.05619	0.000122816		NAA50	0.740674	2.83946e-05
LRWD1	3.30711	0.000792965		NABP2	1.26578	0.217447
LSM10	6.2119	0.0128769		NACC1	-1.36677	2.15129e-06
LSM11	1.64915	0.0329557		NAMPT	1.92927	0.0136627
LSM2	-0.466595	0.622354		NANS	1.66518	0.257227
LSM3	1.12937	0.0141725		NAP1L4	0.581683	0.0616074
LSM7	1.43001	7.42724e-05		NAT10	-2.24393	2.47715e-17
LSM8	-0.692029	0.314548		NAV2	-2.51448	0.133124
LUC7L	0.541164	0.53599		NAXE	-2.62352	0.00467784
LUC7L2	-0.244364	0.539418		NBN	0.329427	0.0108415
LUC7L3	0.0780522	0.833308		NCBP2	1.94923	0.000394196
LYRM4	-0.702988	0.426866		NCBP3	3.75071	0.00240737
MACROH2A1	-1.43972	0.000184769		NEK7	1.30177	0.073473
MAD2L1	0.254571	0.848375		NEPRO	2.11948	1.35182e-09
MAEA	1.57119	0.436795		NHEJ1	-1.22254	0.426312
MAGOH	-3.9228	0.34906		NIFK	0.947837	1.34185e-09
MAK16	1.38058	4.64088e-05		NIP7	-0.101544	0.542831
MAP2K6	-2.3265	0.176071		NLE1	0.371334	0.229456
MAPK3	1.69018	0.320117		NMD3	6.29372	0.199785
MAT2A	-0.279614	0.780303		NMNAT1	0.470317	0.0350477
MATR3	0.484997	3.31325e-06		NOC3L	-0.513602	7.99506e-10
MBNL1	1.61909	0.00526941		NOC4L	-2.16818	1.03234e-11
MCM10	0.375738	0.280106		NOL10	-1.06071	6.71933e-11
MCM2	-1.06697	0.302709		NOL6	2.77243	4.69624e-08
MCM3	-0.12034	0.138426		NOL8	-0.171376	0.149626
MCM4	-1.95442	0.134399		NOL9	4.73957	7.66711e-10
MCM5	-1.09022	7.92319e-07		NOLC1	0.370749	9.75255e-05
MCM6	-0.618069	0.292699		NOM1	-2.79551	6.06621e-15
MCM7	-1.90924	8.80201e-07		NOP10	-1.02466	4.75113e-09
MDC1	-0.0889692	0.753428		NOP14	1.04734	3.78026e-07
ME1	7.19859	0.000203491		NOP16	0.49963	1.94484e-08
METTL1	1.28821	0.385646		NOP2	-0.486949	1.31686e-06
MFAP1	1.23281	0.0272022		NOP53	1.56342	1.28475e-12
MGMT	0.203878	0.609761		NOP56	0.0846666	0.0186506
MGST3	1.31371	2.72245e-07		NOP58	-0.0785945	0.0480055
MIDEAS	2.22974	0.039447		NOP9	-3.48665	2.67773e-06
MKI67	-1.19014	1.54747e-11		NOSIP	-3.82208	0.109744
MLH1	0.691897	0.0024476		NRM	3.33075	1.65796e-08
MPG	0.200423	0.0219209		NSA2	1.53564	2.52289e-11
MPHOSPH10	3.554	0.0216426		NSFL1C	-1.87396	2.71977e-07
MPHOSPH6	-1.6194	0.00451621		NSL1	-0.864809	0.532463
MRE11	0.88206	0.000315214		NSMCE1	1.92383	0.142329
MRTO4	0.333302	0.0121074		NSMCE2	-0.922093	0.106661
MSH2	0.0894498	0.315192		NSUN5	1.75923	3.49639e-08
MSH3	-3.30648	0.0157831		NT5DC1	-2.26701	0.114208
MSH6	-0.913002	1.33812e-06		NTMT1	-4.24362	0.207052
MSL1	3.59823	1.21533e-08		NUCKS1	5.52863	0.00473539
MTBP	3.46815	4.73052e-07		NUDT16	-2.25574	1.52568e-08
MTREX	1.11016	1.04871e-10		NUDT21	1.80826	6.11168e-10
MUS81	2.16327	3.19867e-08		NUF2	2.15982	0.0329537
MYADM	1.73505	0.0149132		NUFIP1	4.5342	1.28893e-07
MYO1C	2.47288	0.00108054		NUFIP2	-1.41164	0.074661
MYPN	1.28342	4.6163e-05		NUMA1	0.128445	4.85835e-05
NAA40	-0.0654418	0.941032		NUP107	4.3153	2.10136e-10
NAA50	0.77648	0.00045522		NUP133	-1.30156	0.185437
NABP2	-5.46134	0.154384		NUP153	1.29958	6.93236e-08
NACC1	-1.0853	0.00771217		NUP155	4.58357	2.1007e-06
NAMPT	0.836079	0.418446		NUP188	-1.30657	0.259676
NANS	-0.746357	0.424247		NUP35	-0.442606	0.0226303
NAP1L4	0.534612	0.445588		NUP37	0.854525	0.0114231
NAT10	-3.13087	6.06828e-14		NUP42	0.233908	0.345462
NAV2	1.4138	0.436527		NUP43	0.0469198	0.874402
NAXE	-1.27714	0.146722		NUP50	-0.114962	0.376466
NBN	0.875153	0.0397484		NUP54	-1.03449	0.000355754
NCAPG2	2.10338	1.60744e-05		NUP85	-0.629272	0.0117288
NCBP2	2.39487	0.00499453		NUP88	0.502954	0.0203787
NCBP3	3.78711	0.0034419		NUSAP1	0.10335	0.00298773
NDC1	2.30455	4.68738e-05		NXF1	-1.61364	3.6092e-09
NEK7	0.99972	0.400285		NXT1	-1.25261	0.0831412
NEMP1	3.22173	0.000515192		OARD1	-0.201358	0.747729
NEPRO	3.4261	0.0348573		OGFOD3	4.0181	1.04077e-05
NHEJ1	-2.33317	0.22343		OGG1	-0.375819	0.0835652
NIFK	0.73667	3.39399e-06		ORC1	4.9478	2.11203e-08
NIP7	-0.0299051	0.907548		ORC3	0.234656	0.617735
NLE1	-0.168878	0.698524		ORC4	0.618144	0.032598
NMD3	-1.52504	0.258616		ORC5	1.1814	2.30652e-05
NMNAT1	1.79121	1.49497e-07		ORC6	-1.06317	0.00253901
NOC3L	-0.922224	3.78841e-05		OSGEP	1.8332	0.240836
NOC4L	-2.04212	9.10081e-08		OVCA2	2.69023	0.107036
NOL10	-0.466119	0.0149908		PABPN1	-1.09932	2.33456e-07
NOL6	3.20641	2.39392e-06		PAK1IP1	1.80632	2.6896e-11
NOL8	-0.464451	0.0067129		PARP1	-1.50084	1.15101e-15
NOL9	5.61113	1.95457e-07		PAXX	0.60347	5.8104e-05
NOLC1	-0.310679	0.00521387		PCBP1	-0.623877	2.47083e-07
NOM1	-3.02338	5.14897e-10		PCID2	0.600717	0.000255842
NOP10	-1.6362	4.37887e-06		PCNA	0.408628	0.000902825
NOP14	0.943704	3.951e-05		PCNP	1.2135	7.80609e-06
NOP16	-0.863028	1.73919e-07		PCYT1A	-0.609416	0.197134
NOP2	-0.123358	0.109787		PDCD11	-0.103218	0.00452815
NOP53	0.29212	0.014048		PDS5A	-0.582109	0.00177597
NOP56	-0.17933	0.0092677		PDXK	-0.0240749	0.963853
NOP58	0.0207272	0.772622		PELO	-1.27225	0.108325
NOP9	-4.2799	6.12802e-11		PGAM1	-1.24125	0.000108938
NOSIP	-4.73775	0.230494		PGLS	-1.09716	0.0326833
NRM	2.35082	1.37042e-07		PGP	-1.27995	0.309438
NSA2	0.638307	9.55605e-05		PHC2	2.10503	1.02512e-06
NSFL1C	-1.41063	6.55165e-05		PHC3	3.3468	1.36243e-06
NSL1	1.25087	0.505274		PHF20L1	-2.11517	0.000159213
NSMCE1	-0.0826571	0.916433		PHF6	2.5165	7.99278e-13
NSMCE2	0.190694	0.574343		PIN4	0.294689	0.537167
NSUN5	0.441646	2.26322e-07		PKP1	4.55952	1.90264e-10
NT5DC1	-1.33146	4.67486e-05		PM20D2	-0.259274	0.285961
NTMT1	-4.10579	0.158554		PMM2	-2.30561	0.0640843
NUCKS1	0.448511	0.356405		PNKP	0.23411	1.62023e-05
NUDT16	-2.06044	1.03646e-06		PNN	-0.415795	0.101698
NUDT21	0.8724	0.000228427		PNO1	0.683565	0.000851207
NUF2	0.908215	0.246072		POGZ	4.70876	0.196869
NUFIP1	5.59969	0.0064764		POLD2	-0.802264	0.461952
NUFIP2	-1.96409	1.27905e-06		POLDIP3	1.08474	1.29351e-12
NUMA1	-0.398847	2.5022e-05		POLE3	-0.389586	0.108602
NUP107	5.0783	1.55614e-12		POLE4	0.741653	0.393325
NUP133	1.37218	2.91302e-08		POLR1B	1.79339	9.99788e-08
NUP153	2.0015	2.77077e-15		POLR1C	0.902571	1.71269e-09
NUP155	3.43426	4.47911e-07		POLR1E	0.671623	1.92961e-07
NUP188	-2.07837	5.26003e-11		POLR1F	0.43421	0.00121027
NUP35	-1.29159	1.16812e-06		POLR2C	-1.29339	0.0518443
NUP37	1.54466	2.56802e-05		POLR2E	-0.484758	0.000439026
NUP42	0.0950824	0.625334		POLR2G	-1.27943	0.0267239
NUP43	1.06378	0.000385302		POLR2H	0.347507	0.011024
NUP50	0.495511	0.00576245		POLR2L	2.195	5.51337e-07
NUP54	0.129155	0.165871		POM121	-0.715695	3.46686e-05
NUP85	-0.221287	0.0435272		POP1	0.0989362	0.0186788
NUP88	1.16938	6.0222e-11		POP4	0.574295	4.76178e-06
NUSAP1	-0.0628709	0.240474		POP5	1.42169	2.18728e-05
NXF1	-2.00129	3.86664e-11		POP7	0.612729	0.000106006
NXT1	-1.0332	0.00108929		PPIL1	0.323162	0.0695274
OARD1	-1.36945	5.937e-06		PPIL3	0.497848	0.0485011
OGFOD3	4.2362	1.67237e-05		PPP1CB	0.459631	0.000191553
OGG1	-0.334461	0.00778513		PPP1R10	1.07297	1.38687e-05
ORC1	4.92884	3.5537e-07		PPP1R8	-0.811453	0.217242
ORC3	0.436549	0.243647		PPP4C	3.09215	0.170189
ORC4	0.334451	0.180392		PRIM2	0.864594	0.265304
ORC5	0.458265	0.00019531		PRKDC	0.25828	7.4853e-06
ORC6	-1.46572	0.000128068		PRPF18	-1.36886	0.341842
OSGEP	-2.19816	0.438265		PRPF19	1.75586	2.33184e-12
OVCA2	-1.9743	0.330642		PRPF3	-1.11024	5.47925e-09
PABPN1	-0.0718965	0.576756		PRPF31	0.192487	0.522833
PAK1IP1	1.1282	6.73235e-07		PRPF38A	0.904237	9.58168e-06
PARP1	-0.781038	5.1764e-05		PRPF4	-0.169357	0.000949907
PAXX	2.54431	0.0841224		PRPF4B	-0.707075	1.98792e-08
PCBP1	-1.0845	2.36367e-09		PRPF8	0.663182	6.19814e-05
PCID2	0.206995	0.195327		PRR14	1.93645	0.000327056
PCNA	0.106608	0.499169		PSMA1	-1.2125	0.00278469
PCNP	1.35341	0.00530039		PSMA6	-0.265401	0.073805
PCYT1A	0.233085	0.736248		PSMB1	-1.05373	1.38691e-06
PDCD11	-0.277998	0.054356		PSMB2	-0.446963	0.00501767
PDS5A	-1.23829	6.47209e-08		PSMB4	-1.77687	1.98599e-08
PDXK	0.873363	0.394803		PSMB7	-2.19796	0.0457572
PELO	-1.83355	0.158296		PSMC3IP	0.913167	0.309841
PGAM1	0.423955	0.404076		PSMD13	-2.25274	0.00371915
PGLS	-2.03439	0.104949		PSMD14	-1.8277	0.000243547
PGP	-2.95835	0.273763		PSMD3	0.826041	3.44036e-06
PHC2	1.81648	4.76056e-05		PSMD4	-0.41278	0.43097
PHC3	3.9129	2.16118e-09		PSMD7	-0.425051	0.456566
PHF20L1	-1.14693	0.000722008		PSME2	2.05571	0.431115
PHF6	1.23405	0.00165452		PSME3	-2.69623	0.242965
PIN4	-0.0616036	0.817643		PSMG2	1.97384	0.180968
PKP1	6.18865	1.79727e-10		PTBP1	0.666371	1.32957e-05
PM20D2	-0.681873	0.659614		PTBP2	1.53955	0.118144
PMM2	-0.269032	0.7691		PTBP3	0.916564	3.71101e-06
PNKP	-0.97287	0.396731		PTMA	-0.759527	0.000410944
PNN	0.0453581	0.83805		PTMS	-1.07989	0.00541752
PNO1	0.410946	0.00437398		PTPA	0.817528	0.285187
POGLUT2	-0.942877	0.321126		PTPN2	-4.41902	0.30253
POGZ	4.4731	8.93328e-09		PTTG1IP	3.45912	0.0964479
POLD2	-2.96349	0.112285		PUM3	2.79788	1.18339e-06
POLDIP3	0.520545	7.05015e-07		PWP2	-0.710125	0.0864611
POLE3	-0.45895	0.474062		PWWP2A	0.333187	0.237684
POLE4	-0.179362	0.828204		QKI	0.43249	0.0858576
POLR1B	1.96416	0.101		RAB5A	-0.293088	0.0215437
POLR1C	0.0635637	0.905942		RAB8A	0.725752	0.05727
POLR1E	0.453676	0.071364		RACGAP1	0.60167	8.03439e-05
POLR1F	0.807471	0.272317		RACK1	0.536631	9.71026e-06
POLR2C	-4.53985	0.273927		RAD18	1.13385	2.48011e-06
POLR2E	-0.874808	0.00355005		RAD23B	-0.154758	0.000662645
POLR2G	-2.16386	0.185804		RAD51	0.0708726	0.65232
POLR2H	1.15643	0.0266129		RAD51AP1	-0.289581	0.604701
POLR2L	1.47987	2.10066e-05		RAE1	-0.334817	1.39132e-05
POM121	-0.500018	4.17859e-05		RANBP2	-0.554113	0.00919759
POP1	-0.192078	0.0133427		RANGAP1	-0.519403	2.38882e-05
POP4	0.55811	0.0889831		RAVER1	0.0307218	0.59716
POP5	0.604087	0.441609		RBBP6	-1.72703	5.08994e-10
POP7	0.292167	0.0541994		RBIS	-1.66948	5.14445e-12
PPIL1	0.0118807	0.942276		RBM10	-1.37714	6.06236e-07
PPIL3	0.272944	0.57371		RBM17	0.546658	0.0305254
PPP1CB	0.00556836	0.937683		RBM19	-0.551918	0.00218905
PPP1R10	1.40107	1.38799e-06		RBM22	0.615294	0.00806895
PPP1R8	-0.4843	0.604833		RBM25	1.62734	9.44803e-05
PPP4C	4.60617	0.0151144		RBM26	-0.0329863	0.883727
PRIM2	-1.0262	0.177152		RBM27	0.651096	0.0141163
PRKDC	-0.351988	7.70013e-07		RBM28	-0.5369	2.34952e-05
PRPF18	3.76138	0.0777265		RBM3	0.713315	1.85127e-05
PRPF19	0.987373	1.26346e-07		RBM34	0.673328	1.52043e-08
PRPF3	-0.599463	0.00271736		RBM4	0.817463	2.0377e-07
PRPF31	0.638929	0.0353726		RBM42	-2.10948	2.98271e-05
PRPF38A	1.24326	0.00347078		RBM45	-0.202729	0.0551996
PRPF4	0.58799	5.98252e-05		RBM4B	0.646285	0.20386
PRPF4B	-0.182486	0.840828		RBM7	5.68605	0.00211098
PRPF8	0.922964	0.000879046		RBM8A	0.0821788	0.467061
PRR14	3.09118	2.02344e-06		RBMX2	0.537072	7.00777e-05
PSMA1	0.459786	0.0428248		RBMXL1	2.66591	0.00120781
PSMA6	0.38293	0.0422078		RCC1	0.0641921	0.0920202
PSMB1	0.587933	0.000451349		RCL1	0.439385	3.22575e-09
PSMB2	0.445147	0.000682481		RDH14	0.29033	0.174992
PSMB4	-0.131112	0.306078		RECQL	0.594293	4.25012e-08
PSMB7	1.06723	0.259293		RFC1	-1.85714	1.08742e-14
PSMC3IP	-0.159934	0.212554		RFC2	0.0542231	0.238476
PSMD13	-1.23486	0.00828744		RFC3	1.05995	3.90994e-13
PSMD14	-2.01113	0.022485		RFC4	1.16729	5.18254e-14
PSMD3	0.503205	0.0117273		RFC5	0.548424	3.65315e-08
PSMD4	0.0144234	0.987906		RIF1	0.649814	0.00187584
PSMD7	-1.71104	0.000724893		RIOX1	0.405079	3.13917e-07
PSME2	-2.0097	0.160221		RIOX2	-1.49614	0.00219374
PSME3	-0.340589	0.705691		RMI1	0.881718	0.0133203
PSMG2	-0.702524	0.000744849		RMI2	-2.23634	4.16584e-11
PTBP1	0.29784	0.00125748		RNASEH2B	-3.78225	0.246097
PTBP2	3.53621	0.162834		RNGTT	1.56783	0.0133432
PTBP3	0.341794	0.0054847		RNMT	-0.345951	0.505496
PTMA	-0.38426	0.0774501		RNPS1	0.445941	0.000869764
PTMS	2.81637	0.372023		RPA1	-0.375917	1.06762e-07
PTPA	-1.9685	0.329046		RPA2	-0.054877	0.088633
PTPN2	-5.22604	0.275788		RPF1	-1.26678	1.33395e-11
PTTG1IP	-0.950435	0.0229167		RPF2	2.88803	9.34012e-10
PUM3	3.38809	2.56287e-07		RPIA	-1.71778	0.00148964
PWP2	-1.56582	9.20797e-05		RPL18A	2.33896	2.00336e-15
PWWP2A	1.3235	0.00129319		RPL22	-0.368721	2.01009e-06
QKI	-0.0210704	0.943635		RPL27	1.79681	7.04368e-16
QSER1	3.03241	1.14909e-07		RPL7A	-0.540573	1.35399e-10
RAB5A	-1.29258	2.06781e-07		RPP25	-0.294263	0.0121906
RAB8A	0.370256	0.350987		RPP30	-0.183143	0.132756
RAB9A	2.16534	0.000812606		RPP38	-0.191167	0.00082202
RACGAP1	0.378353	1.51506e-05		RPP40	-1.27714	1.71236e-05
RACK1	0.375956	0.000945621		RPRD2	-0.442874	0.602803
RAD18	0.91569	0.00233208		RPS19	0.442517	2.03262e-07
RAD23B	-0.1337	0.354337		RPUSD3	-0.652709	0.263778
RAD51	-1.93428	0.158564		RRP12	-2.98025	1.95243e-15
RAD51AP1	-2.43747	0.0945796		RRP36	0.592262	8.77293e-05
RAE1	0.0287559	0.47127		RRP7A	-0.216664	0.0734288
RANBP2	-0.538476	3.20412e-07		RRP9	1.42751	1.14945e-08
RANGAP1	0.0406688	0.537407		RRS1	-0.864964	1.72337e-07
RAVER1	0.516464	0.000226431		RSBN1L	-1.4938	2.57518e-07
RBBP6	-0.89317	0.0257253		RSL24D1	-1.19594	4.24436e-08
RBIS	-2.21362	3.63836e-08		RSRC1	2.32126	0.0803443
RBM10	-1.20749	6.10041e-07		RTCA	-2.43021	0.250182
RBM17	0.74097	0.0096129		RTCB	0.529174	0.000195301
RBM19	-1.39003	4.13208e-08		RTF2	2.8041	0.25615
RBM22	1.14887	5.65558e-06		RTRAF	0.0544279	0.630791
RBM25	0.877371	1.93761e-05		S100A4	-1.10284	8.20413e-05
RBM26	0.353697	1.20755e-05		S100P	-1.72909	1.73245e-06
RBM27	0.282977	2.71029e-05		SARNP	0.18177	0.00100213
RBM28	-0.821715	5.71504e-06		SART1	-0.450389	0.00709945
RBM3	-0.570789	0.0318807		SCAF11	0.180064	0.139112
RBM34	1.15962	2.00679e-06		SCAF4	4.0747	0.00582192
RBM4	0.557836	5.68435e-05		SDAD1	-1.36965	3.49748e-13
RBM42	-2.08836	0.00164106		SEC11A	1.32956	4.28839e-05
RBM45	1.82172	0.440713		SEC13	-0.769872	0.000228917
RBM4B	-1.45483	0.00128631		SELENBP1	1.39949	0.000120235
RBM7	1.27338	0.127162		SELENOH	-1.77768	3.93909e-10
RBM8A	0.759177	0.00277271		SENP3	0.378378	0.000424301
RBMX2	-3.80923	0.0206449		SEPHS1	-1.37326	0.000212729
RBMXL1	1.03091	0.013472		SERF2	0.201985	0.868585
RCC1	-0.215165	0.0034449		SERPINB8	-0.967003	2.82607e-06
RCL1	0.678937	0.0022507		SET	1.43869	7.26712e-06
RDH14	-0.0763495	0.841137		SETMAR	-0.652908	0.626033
RECQL	0.538308	0.0208486		SF3A1	-0.63559	1.46499e-05
RFC1	-1.38838	7.39716e-06		SF3A2	0.155178	0.510586
RFC2	-0.37042	5.3085e-05		SF3A3	0.829064	1.07367e-06
RFC3	0.525853	0.00021109		SF3B1	0.00792952	0.951502
RFC4	0.502813	1.40022e-05		SF3B2	1.17767	6.74087e-05
RFC5	-0.174092	0.0203238		SF3B3	0.555206	0.00113388
RIF1	-0.394636	0.0398648		SF3B4	-0.0716046	0.663264
RIOX1	1.91125	0.00133313		SF3B5	1.07509	0.000303618
RIOX2	-1.69506	0.0573176		SF3B6	0.295399	0.139866
RMI1	2.48522	0.161068		SGTA	-0.336059	0.542911
RMI2	-1.54593	0.0299539		SH3BGRL3	0.988825	0.0157735
RNASEH2B	-2.47956	1.36894e-08		SHCBP1	-1.614	0.327785
RNGTT	1.01196	1.94737e-05		SINHCAF	0.884524	3.44014e-06
RNMT	-0.954265	3.58439e-07		SKP1	-0.637385	0.00312254
RNPS1	0.770386	0.000158091		SLC1A3	1.32894	0.242036
RPA1	0.17435	0.34245		SLC25A12	6.16104	2.07205e-10
RPA2	0.299615	0.297374		SLC3A2	0.374017	0.0487143
RPF1	-0.355066	0.517396		SLFN5	-0.397463	0.0192695
RPF2	2.38629	2.46921e-07		SLU7	-2.10619	6.10655e-06
RPIA	-1.38555	0.211959		SLX9	0.220148	0.000708034
RPL18A	0.98542	1.34399e-06		SMC1A	-0.248772	0.165257
RPL22	-1.42198	7.50374e-07		SMCHD1	0.894626	0.0860721
RPL27	0.418913	0.0262413		SMNDC1	-0.271586	0.176217
RPL7A	-0.0588692	0.545189		SMPD4	-0.175269	0.00991054
RPP25	-0.938235	0.000185511		SMS	-1.2122	0.0101487
RPP30	0.129213	0.488552		SNRNP200	0.523522	0.000731208
RPP38	-0.389923	0.0202592		SNRNP27	-0.90953	0.451562
RPP40	-2.54194	0.149974		SNRNP40	0.606143	0.00349564
RPRD2	-0.848877	0.0135389		SNRNP70	0.084375	0.363865
RPS19	-0.644635	1.61649e-06		SNRPA	0.841394	1.85553e-06
RPUSD3	-1.00996	0.000239124		SNRPA1	0.714349	1.30134e-06
RRP12	-3.3455	2.76102e-10		SNRPB	0.944106	0.000142054
RRP36	0.544803	0.109016		SNRPB2	1.52561	2.14808e-05
RRP7A	0.100724	0.454325		SNRPC	0.220607	0.201193
RRP9	1.32955	0.000173677		SNRPD3	2.48584	1.18967e-10
RRS1	-0.240123	0.154368		SPAST	-0.489974	0.754266
RSBN1L	-0.830055	0.609578		SPC24	-1.3667	0.424708
RSL24D1	-0.868839	0.00146663		SPIN1	-0.106123	0.904875
RSRC1	-1.18326	0.434078		SPRYD4	2.8607	0.0626706
RTCA	2.39808	0.328271		SPTY2D1	-1.23968	2.13755e-08
RTCB	0.0142108	0.747765		SRM	0.232554	0.208244
RTF2	0.785597	0.613906		SRP14	0.562412	1.27478e-07
RTRAF	-0.556105	9.74642e-06		SRRM2	0.201341	0.0058587
S100A4	-0.265898	0.00583057		SRRT	2.85569	4.45085e-07
S100P	0.910658	0.000549141		SRSF1	0.723068	5.3385e-08
SARNP	0.270082	0.00480712		SRSF10	1.91093	8.50069e-12
SART1	0.123	0.470818		SRSF11	-0.336351	0.428157
SCAF11	0.980749	1.56596e-06		SRSF3	1.06972	1.12517e-05
SCAF4	2.10642	0.0410201		SRSF4	1.77339	0.233246
SDAD1	-2.10441	1.3918e-08		SRSF5	-0.289444	0.1564
SEC11A	0.311877	0.000256889		SRSF6	1.11197	8.27099e-06
SEC13	0.750939	3.05137e-05		SRSF7	0.303144	4.20611e-05
SEC24B	2.24191	5.82953e-09		SRSF9	0.759238	1.31402e-05
SELENBP1	2.5016	0.00153127		SSB	-0.400271	0.288261
SELENOH	-0.518168	0.0890694		STAMBP	0.958393	0.487626
SENP3	0.963827	3.42248e-06		STAU2	-0.256111	0.796941
SEPHS1	0.25376	0.723804		STEAP4	0.943626	0.00010315
SERF2	-1.66764	0.166387		STEEP1	1.53971	0.00456515
SERPINB8	-0.158813	0.144176		STK26	-0.495417	0.70483
SET	2.62272	3.25166e-06		SUGP1	2.42497	0.00729663
SETMAR	-3.40366	0.134633		SUGP2	-1.88747	7.93322e-10
SF3A1	0.209505	0.0318382		SUMO3	0.920968	1.22383e-06
SF3A2	0.24416	0.199919		SUN1	0.695402	0.110676
SF3A3	1.09515	0.000601266		SUN2	-1.74106	6.50118e-06
SF3B1	0.609059	6.4494e-05		SURF6	0.584152	1.06617e-08
SF3B2	2.44879	1.90213e-07		SYF2	3.25102	0.141984
SF3B3	0.748982	1.76837e-06		SYMPK	0.91024	0.0289044
SF3B4	0.62946	0.0268677		SYNCRIP	1.6382	8.70946e-14
SF3B5	0.309246	0.361076		TARDBP	-0.333823	0.00212069
SF3B6	0.123383	0.674324		TAX1BP3	-3.98996	0.0949056
SGTA	1.74867	0.240204		TBL3	-0.911356	0.000612777
SH3BGRL3	-0.246519	0.399497		TBRG1	2.05647	0.000298045
SHCBP1	1.19714	0.0168619		TCOF1	-0.573304	4.07542e-11
SINHCAF	-0.937615	0.000114528		TEX10	-0.384281	3.87556e-06
SKP1	-0.425904	0.0213544		TFIP11	-2.11586	7.0868e-06
SLC1A3	1.06021	3.44536e-05		TFPT	1.54358	5.49484e-05
SLC25A12	5.90893	1.76966e-08		THOC1	-1.8783	4.24553e-07
SLC3A2	0.165604	0.00159371		THOC2	0.981211	0.000250908
SLFN5	-0.816065	8.60484e-05		THOC3	0.988568	0.000639132
SLU7	-1.59788	0.00022787		THOC6	1.00202	5.05636e-09
SLX9	-0.47651	8.31683e-05		THY1	3.21211	6.72354e-09
SMC1A	1.44918	0.118121		TIA1	1.29023	1.94636e-05
SMCHD1	1.28653	0.0100752		TIAL1	0.33853	0.00338178
SMNDC1	0.248595	0.307541		TKT	0.559258	0.00388459
SMPD4	-0.318816	0.00129446		TMA16	-0.656762	0.000106248
SMS	-0.127565	0.78057		TMEM201	-0.115785	0.33982
SNRNP200	0.903315	0.00203463		TMEM209	3.33798	2.3906e-07
SNRNP27	1.17395	0.147289		TMUB1	1.98302	0.24018
SNRNP40	1.0013	0.000351412		TNPO1	-0.592134	0.0446094
SNRNP70	0.611734	0.00255411		TOE1	1.00714	0.00096953
SNRPA	0.901226	0.000193698		TOP2A	-0.189198	0.0223841
SNRPA1	0.894919	9.85247e-08		TOP2B	-0.922117	8.00663e-05
SNRPB	0.715119	0.00302207		TOR1AIP1	0.318436	0.00146966
SNRPB2	-0.0333729	0.827389		TPI1	-0.0662028	0.375015
SNRPC	0.418111	0.0485536		TPX2	-1.18147	3.1833e-07
SNRPD3	0.734971	0.000475401		TRA2A	2.8482	1.60892e-09
SPAST	2.64833	0.119044		TRA2B	0.806848	1.35721e-07
SPC24	1.05052	0.00190566		TRAF4	-0.271286	0.734494
SPIN1	0.90677	0.533538		TRIP12	0.0441898	0.556996
SPPL2B	1.99146	0.00118797		TRIR	-0.22061	0.1108
SPRYD4	-0.175567	0.271878		TRMT1L	2.17604	0.0432878
SPTY2D1	-1.1456	1.98033e-10		TSPYL1	-0.660394	0.000369391
SRM	0.0806686	0.906259		TSR1	4.53555	5.92371e-08
SRP14	-0.631556	1.3633e-05		TXNL4A	-1.85561	0.0729589
SRRM2	0.32858	0.00193892		TXNRD1	2.38233	0.162453
SRRT	5.83541	0.0817496		U2AF1	-0.514045	2.34266e-06
SRSF1	1.01844	2.48651e-06		U2AF2	1.02248	0.000117731
SRSF10	1.93443	2.08468e-06		U2SURP	0.620662	0.315428
SRSF11	-1.16649	0.292023		UBA1	-0.465599	0.3548
SRSF3	1.47021	6.7042e-08		UBE2E1	-2.93743	0.0130443
SRSF4	2.51745	0.392849		UBE2E2	0.737935	0.110275
SRSF5	1.39201	0.0123012		UBE2I	1.01699	0.00317476
SRSF6	0.544354	0.0230279		UBE2M	1.55766	5.61556e-06
SRSF7	0.544504	7.85698e-06		UBE2N	-0.557945	0.0372008
SRSF9	0.995545	1.46961e-06		UBE2T	-1.94432	9.32375e-06
SSB	-0.13573	0.580371		UBE2V1	4.40673	0.000843112
STAMBP	2.63662	0.329811		UBE2V2	-2.32623	9.86723e-07
STAU2	-0.480471	0.0086464		UBFD1	-0.15061	0.879065
STEAP4	-0.0549112	0.444938		UBLCP1	-0.811218	0.62232
STEEP1	1.3471	0.0750249		UBN1	1.93224	1.67808e-08
STK26	1.87278	0.338357		UBN2	3.22338	0.0111096
SUGP1	2.74121	0.00584816		UBR5	-6.25399	2.71458e-05
SUGP2	-1.32308	0.000449314		UCK2	1.43061	0.10679
SUMO3	0.456566	0.0395325		UGDH	-0.557335	0.149372
SUN1	1.84745	2.65372e-06		UHRF1	1.40249	6.68708e-09
SUN2	-1.80847	5.08849e-07		URB1	2.80293	4.8642e-05
SURF6	0.729179	0.000145892		URB2	2.86566	2.40611e-05
SYF2	0.189634	0.841669		USP22	4.5209	0.000471916
SYMPK	0.421902	0.0315507		USP3	0.0790529	0.489198
SYNCRIP	0.571042	3.56809e-07		USP36	1.18175	1.90287e-07
TARDBP	-0.957865	2.30949e-06		USP39	0.875795	6.70498e-06
TASOR2	3.08337	1.72861e-07		USP7	-1.92629	2.58278e-10
TAX1BP3	1.09751	0.179922		UTP11	-0.625084	3.05191e-06
TBL3	-1.15679	7.6667e-06		UTP14A	-2.80125	3.18874e-12
TBRG1	2.92193	9.52896e-07		UTP18	1.21555	2.07454e-09
TCEANC2	3.03684	0.0722086		UTP20	-0.330353	7.95787e-05
TCOF1	-0.732162	0.0158525		UTP23	-0.644536	5.28073e-07
TEX10	-0.41092	1.05304e-05		UTP3	6.70222	2.79312e-08
TFIP11	-2.4462	1.55008e-08		UTP6	2.51507	0.000651914
TFPT	1.88167	3.18489e-07		VPS72	-1.74438	0.000396564
THOC1	-1.18656	0.00014409		VRK1	0.883653	4.80139e-05
THOC2	-0.496105	0.468214		WAPL	0.608447	0.290036
THOC3	1.65668	6.98291e-06		WBP11	-2.26365	6.40366e-12
THOC6	0.945207	2.34218e-06		WDR13	-1.46772	0.515277
THY1	0.00185208	0.985883		WDR18	0.133969	0.0669557
TIA1	-0.184497	0.446684		WDR25	1.92663	0.0157129
TIAL1	0.0971771	0.428671		WDR3	0.158934	0.486469
TKT	1.02098	0.000215635		WDR33	1.66945	0.0240715
TMA16	-1.74528	1.45879e-05		WDR36	-0.612903	0.0167955
TMEM201	-0.648567	0.000115424		WDR46	2.5982	2.58788e-09
TMEM209	3.17293	1.91728e-05		WDR55	-1.05444	0.16267
TMEM50B	0.331194	0.290216		WDR5B	-4.23822	0.000487687
TMEM69	2.67714	0.00233756		WDR74	0.940914	9.02343e-05
TMUB1	0.16761	0.905583		WDR76	6.51722	1.96545e-15
TNPO1	-0.752138	0.000136728		WDR82	1.75829	3.16546e-11
TOE1	0.517606	0.0146661		WTAP	0.922792	1.70168e-05
TOP2A	0.137846	0.0462668		XAB2	-1.84054	1.17777e-05
TOP2B	-0.907202	0.00233878		XPC	1.59063	3.67951e-12
TOR1AIP1	-0.216429	0.00221966		XPO1	-1.42043	3.10706e-09
TOR1B	-2.2665	0.000372275		XRCC1	1.44214	1.6091e-10
TPBG	4.32788	2.26268e-06		XRCC5	-0.0275474	0.20826
TPI1	-1.39846	6.76563e-07		YBEY	0.096608	0.759648
TPX2	-0.902454	2.67861e-09		YJU2	-3.32996	0.233631
TRA2A	2.31697	1.0731e-08		YTHDC1	-1.54158	6.79581e-09
TRA2B	0.364162	0.0717879		ZBTB9	4.20752	6.96031e-08
TRAF4	3.09291	0.0544748		ZC3H11A	-0.713834	4.69334e-05
TRIP12	-0.652965	2.70193e-07		ZC3H14	-0.714353	5.06912e-06
TRIR	1.2257	1.29021e-06		ZC3H18	4.21883	2.01416e-05
TRMT1L	1.5491	2.15766e-05		ZC3H8	0.0581444	0.816095
TSPAN13	2.91373	8.88489e-05		ZC3HC1	0.722587	0.45564
TSPYL1	-0.29991	0.17607		ZCCHC9	1.31682	1.61005e-08
TSR1	4.27802	5.45223e-06		ZFC3H1	-0.452407	0.240879
TXNL4A	-1.42278	0.252841		ZFR	-0.478636	9.79861e-05
TXNRD1	-4.27736	0.0474799		ZMYM3	4.29842	0.123902
U2AF1	-0.32728	0.0355761		ZNF346	-0.210087	0.0255473
U2AF2	1.89379	6.46664e-07		ZNHIT1	-2.17364	0.180659
U2SURP	1.31294	0.0199421		ZRANB2	-4.08597	0.00121848
UBA1	0.0974089	0.908497
UBE2E1	-3.24799	2.00388e-07
UBE2E2	-0.379736	0.621029
UBE2I	1.02273	0.00011343
UBE2M	0.702279	0.0165093
UBE2N	-0.00801371	0.987197
UBE2T	-1.82605	2.68169e-06
UBE2V1	-0.353628	0.841162
UBE2V2	-1.94166	1.01343e-05
UBFD1	2.01597	0.388286
UBLCP1	-0.122593	0.497184
UBN1	3.39033	2.28431e-07
UBN2	4.49626	2.09973e-11
UBR5	-6.69864	2.72187e-05
UCK2	-3.8834	0.3059
UGDH	-1.9706	0.308373
UHRF1	0.571663	0.000630944
URB1	2.88714	1.62391e-05
URB2	2.90536	3.39455e-09
USP22	4.17415	1.42507e-06
USP3	-0.147841	0.0124941
USP36	0.526622	0.000286586
USP39	0.396928	0.0018942
USP7	-1.36596	1.32568e-07
UTP11	-0.448869	0.104591
UTP14A	-2.22592	3.39492e-09
UTP18	0.555962	0.000209753
UTP20	-0.777449	9.73123e-07
UTP23	-1.94734	4.9414e-07
UTP3	7.41421	1.39072e-05
UTP6	0.56857	0.316426
VPS72	-1.08308	4.3562e-06
VRK1	1.1181	0.000125942
WAPL	1.16998	0.0325658
WBP11	-2.27062	1.16861e-06
WDR13	0.598111	0.461271
WDR18	0.602694	1.52684e-05
WDR25	-0.0441841	0.823927
WDR3	-0.0525543	0.683206
WDR33	1.48036	8.60023e-06
WDR36	-0.189238	0.197714
WDR46	2.62353	1.10001e-06
WDR55	-0.658673	0.566196
WDR5B	-2.54037	0.110658
WDR74	1.65164	7.0333e-06
WDR76	5.35419	1.43431e-10
WDR82	1.68028	2.09281e-08
WTAP	0.717606	0.0459994
XAB2	-1.37278	0.0001939
XPC	2.54024	0.00203908
XPO1	-2.31628	5.29164e-13
XPO5	2.24692	2.8438e-05
XRCC1	2.44883	0.000393477
XRCC5	0.450542	3.68853e-06
YBEY	-0.320617	0.334997
YJU2	0.0771531	0.951706
YTHDC1	-1.80794	0.0601395
ZBTB9	4.35135	4.05178e-05
ZC3H11A	-0.352654	0.00213271
ZC3H14	-0.340732	0.00981807
ZC3H18	3.16944	0.000905119
ZC3H8	1.17077	0.238465
ZC3HC1	-0.024126	0.981063
ZCCHC9	0.843427	0.000156643
ZFC3H1	0.509468	0.00371961
ZFR	-1.0083	1.08271e-10
ZMYM3	6.40024	0.000169508
ZNF346	-1.33887	0.000664651
ZNHIT1	-0.465205	0.335298
ZRANB2	-5.15495	0.285285
ZZZ3	3.65608	1.8743e-09

## Sheet: S7
Gene	O-GlcNAcylation_degree	DNA-binding_capability		Gene	O-GlcNAcylation_degree	DNA-binding_capability		Gene	O-GlcNAcylation_degree	DNA-binding_capability
ZNF687	low	low		SELENOH	No	low		TAF8	high	No
NFAT5	low	low		WDR5B	No	low		RFX5	high	No
C1D	low	low		ZRANB2	No	low		LYAR	high	No
NRF1	low	low		GDPD3	No	low		INO80C	high	No
MBD1	low	low		MAGOH	No	low		DPY30	high	No
ZBTB21	low	low		NAXE	No	low		CREB1	high	No
NR4A1	low	low		DCPS	No	low		CLOCK	high	No
KAT8	low	low		CUL4A	No	low		PML	high	No
MGA	low	low		PSMD13	No	low		JUND	high	No
EZH2	low	low		RMI2	No	low		RBPJ	high	No
WIZ	low	low		PSMB7	No	low		KDM2B	high	No
TAF5	low	low		PHF20L1	No	low		CCNC	high	No
RBX1	low	low		DNAJC25	No	low		SMARCB1	high	No
ZSCAN26	low	low		IMPA2	No	low		NFYA	high	No
TTF1	low	low		ACSL3	No	low		MED4	high	No
BPTF	low	low		USP7	No	low		SMARCE1	high	No
TADA3	low	low		MAT2A	No	low		CDK8	high	No
UBTF	low	low		SUGP2	No	low		MED1	high	No
UBR5	low	low		THOC1	No	low		INO80B	high	No
DDX27	low	low		NSFL1C	No	low		MED11	high	No
FLYWCH1	low	low		RFC1	No	low		SMARCD2	high	No
NOP9	low	low		XAB2	No	low		TBL1XR1	high	No
RRP12	low	low		PSMB4	No	low		MED27	high	No
MSH3	low	low		ALDOC	No	low		MEF2D	high	No
UBE2E1	low	low		VPS72	No	low		MED8	high	No
CCDC127	low	low		HMGN1	No	low		DPF2	high	No
DIDO1	low	low		S100P	No	low		PHF10	high	No
NAT10	low	low		RBBP6	No	low		ZHX2	high	No
NOM1	low	low		BUD23	No	low		EMSY	high	No
CDIPT	low	low		RPIA	No	low		MED22	high	No
CPA4	low	low		LSM2	No	low		TBL1X	high	No
DDX10	low	low		MACROH2A1	No	low		KMT5A	high	No
GTF3C1	low	low		MKI67	No	low		MED28	high	No
INTS6	low	low		SMYD3	No	low		MED29	high	No
KRT77	low	low		CHD3	No	low		SMARCC2	high	No
TFIP11	low	low		SMARCC1	No	low		MED15	high	No
WBP11	low	low		TRIM28	No	low		MED10	high	No
UTP14A	low	low		SMARCA1	No	low		CCAR1	high	No
RBIS	low	low		SAP18	No	low		MBTD1	high	No
DDB1	low	low		ZBTB11	No	low		MED16	high	No
HNRNPUL2	low	low		ANP32E	No	low		MED6	high	No
DDX41	low	low		ATF1	No	low		MED19	high	No
RBM42	low	low		KMT2A	No	low		MED31	high	No
DCTN5	low	low		BMI1	No	low		ASF1A	high	No
NUDT16	low	low		NPM1	No	low		MED30	high	No
NOC4L	low	low		SUZ12	No	low		EP400	high	No
IPO8	low	low		AHCTF1	No	low		MBNL1	high	No
PSMD14	low	low		CNOT11	No	low		WDR74	high	No
NXF1	low	low		ATAD2	No	low		THOC3	high	No
UBE2V2	low	low		NFYB	No	low		CUL1	high	No
MCM7	low	low		NKRF	No	low		APOBEC3B	high	No
UBE2T	low	low		ATAD5	No	low		NMNAT1	high	No
SUN2	low	low		MEAF6	No	No		IMP3	high	No
ARL6IP6	low	low		MORF4L2	No	No		TFPT	high	No
SLU7	low	low		SRSF2	No	No		U2AF2	high	No
PBX1	low	No		HDGF	No	No		RIOX1	high	No
PRDM1	low	No		SRFBP1	No	No		Nhigh153	high	No
ZNF148	low	No		RCOR1	No	No		BCL7C	high	No
RBMX	low	No		NR2F6	No	No		SF3B2	high	No
DHX33	low	No		TCERG1	No	No		XRCC1	high	No
ZNF593	low	No		HNRNPK	No	No		HMGN5	high	No
HELLS	low	No		CBX5	No	No		SELENBP1	high	No
SRCAP	low	No		PTMA	No	No		SET	high	No
PIN1	low	No		KNOP1	No	No		BANF1	high	No
MED12	low	No		PDCD11	No	No		ISY1	high	No
RBMX2	low	No		FBL	No	No		FKBP5	high	No
C1orf35	low	No		CDCA2	No	No		SUN1	high	No
XPO1	low	No		POP4	No	No		INTS9	high	No
H1-4	low	No		POP7	No	No		CWC15	high	No
SDAD1	low	No		POLR1E	No	No		INTS5	high	No
UTP23	low	No		GRWD1	No	No		CCDC12	high	No
H1-1	low	No		CPSF4	No	No		KANSL1	high	No
TMA16	low	No		LAS1L	No	No		AKAP8	high	No
H1-0	low	No		TRA2B	No	No		POGZ	high	No
NOP10	low	No		EXOSC1	No	No		PPP4C	high	No
TXNRD1	low	No		APTX	No	No		ZMYM3	high	No
EPOP	low	No		STEEP1	No	No		ZFP64	high	high
INTS15	low	No		GEMIN2	No	No		SAFB2	high	high
LEMD3	low	No		ANAPC10	No	No		TPR	high	high
CAPG	low	No		CMSS1	No	No		ZNF131	high	high
RNASEH2B	low	No		BAG1	No	No		PATZ1	high	high
CYRIB	low	No		FLYWCH2	No	No		ARGLU1	high	high
GET3	low	No		ENSA	No	No		POU2F1	high	high
Nhigh188	low	No		HMGA1	No	No		SAFB	high	high
NUFIP2	low	No		RECQL5	No	No		PHF8	high	high
BCL7B	low	No		SIRT6	No	No		ZNF579	high	high
C18orf21	low	No		KAT6B	No	No		MPHOSPH8	high	high
PSMD7	low	No		CXXC1	No	No		FOXP1	high	high
DPCD	low	No		ELF2	No	No		INO80E	high	high
ATAD1	low	No		CSNK2A1	No	No		PELP1	high	high
CBX2	low	high		NFIL3	No	No		CTCF	high	high
SAP30L	low	high		MECP2	No	No		SP2	high	high
				NFRKB	No	No		THOC5	high	high
				RBM15B	No	No		TBX3	high	high
				ADNP	No	No		FOXP4	high	high
				KCTD1	No	No		TAF5L	high	high
				HEATR1	No	No		MEN1	high	high
				TAF4B	No	No		TAF6L	high	high
				GTF2I	No	No		TRRAP	high	high
				DR1	No	No		KDM1B	high	high
				SPEN	No	No		HMGXB4	high	high
				MSL3	No	No		ZBTB7A	high	high
				FOXK2	No	No		EGR1	high	high
				PHF21A	No	No		L3MBTL2	high	high
				BLM	No	No		SAP130	high	high
				KDM1A	No	No		TEAD1	high	high
				TOX4	No	No		FOXC1	high	high
				CHD4	No	No		ZBTB43	high	high
				CBX3	No	No		SSBP3	high	high
				ZFX	No	No		ZNF768	high	high
				SUB1	No	No		ZNF143	high	high
				BAZ1B	No	No		CENPF	high	high
				ZNF24	No	No		ZNF639	high	high
				DNMT1	No	No		ZNF281	high	high
				RREB1	No	No		RFX1	high	high
				ShighT3H	No	No		BBX	high	high
				MED7	No	No		SENP1	high	high
				TFAP2C	No	No		CTR9	high	high
				TAF4	No	No		PHF2	high	high
				CDK7	No	No		FOXA1	high	high
				ZNF638	No	No		ShighT7L	high	high
				SNW1	No	No		HIRA	high	high
				FOS	No	No		SLTM	high	high
				ZNF362	No	No		PAF1	high	high
				HMGB3	No	No		MLX	high	high
				LRIF1	No	No		INO80	high	high
				CDYL	No	No		ZKSCAN8	high	high
				HNRNPC	No	No		HOXC9	high	high
				FOSL2	No	No		EHMT1	high	high
				EED	No	No		TAF13	high	high
				APEX1	No	No		DHX36	high	high
				SMARCA5	No	No		ZNF524	high	high
				NONO	No	No		SETD1A	high	high
				MORF4L1	No	No		TCF7L2	high	high
				SP1	No	No		ZNF384	high	high
				RUNX3	No	No		ZNF592	high	high
				CDC5L	No	No		ZNF512B	high	high
				SON	No	No		MAZ	high	high
				MBD2	No	No		GTF2B	high	high
				DDX1	No	No		PHF20	high	high
				THYN1	No	No		OGT	high	high
				USF1	No	No		EPC1	high	high
				DNTTIP2	No	No		ZNF174	high	high
				ZBTB24	No	No		TWIST2	high	high
				SF1	No	No		TRPS1	high	high
				TFAP2A	No	No		SIRT7	high	high
				NFIA	No	No		KMT2B	high	high
				HDAC2	No	No		LEO1	high	high
				ASH2L	No	No		MTA1	high	high
				NFYC	No	No		ShighT20H	high	high
				SMARCD1	No	No		SMARCA4	high	high
				DDX39B	No	No		TAF1	high	high
				RBM15	No	No		MED23	high	high
				PSIP1	No	No		HLTF	high	high
				HCFC1	No	No		TAF3	high	high
				KLF3	No	No		VEZF1	high	high
				NCL	No	No		TAF7	high	high
				HNRNPD	No	No		FIZ1	high	high
				MBD4	No	No		PRPF6	high	high
				TAF9	No	No		BCLAF1	high	high
				DLX1	No	No		MED21	high	high
				TAF6	No	No		THAP3	high	high
				CHTOP	No	No		PBRM1	high	high
				TOP1	No	No		BCOR	high	high
				HSPA8	No	No		NFIB	high	high
				NR2C1	No	No		SIX2	high	high
				PBX2	No	No		CCNK	high	high
				RUNX1	No	No		FOXF2	high	high
				ZNF668	No	No		RUNX2	high	high
				TGIF1	No	No		ARID2	high	high
				RAN	No	No		ELK3	high	high
				CNBP	No	No		BRD8	high	high
				RNF2	No	No		MED17	high	high
				THRAP3	No	No		ZFP91	high	high
				DEK	No	No		KLF5	high	high
				REPIN1	No	No		HCFC2	high	high
				XRN2	No	No		EYA1	high	high
				TFDP1	No	No		KLF4	high	high
				E2F6	No	No		MXI1	high	high
				TAF9B	No	No		FOXK1	high	high
				CCAR2	No	No		GTF2IRD1	high	high
				XRCC6	No	No		ARID4A	high	high
				DMAP1	No	No		KDM5A	high	high
				SGF29	No	No		LSM11	high	high
				RBBP5	No	No		WDR82	high	high
				FUS	No	No		C17orf49	high	high
				ACTL6A	No	No		PHC2	high	high
				MTA2	No	No		SRSF10	high	high
				ALYREF	No	No		SCAF4	high	high
				PRMT1	No	No		INTS7	high	high
				USF2	No	No		CTNNBL1	high	high
				RPRD1B	No	No		MUS81	high	high
				GABPA	No	No		INTS13	high	high
				SFPQ	No	No		MIDEAS	high	high
				PCGF1	No	No		AK6	high	high
				NR2C2	No	No		TRA2A	high	high
				GATAD2B	No	No		NRM	high	high
				RXRB	No	No		RPF2	high	high
				PLRG1	No	No		NCBP2	high	high
				JUNB	No	No		MYO1C	high	high
				PSPC1	No	No		EME1	high	high
				AURKB	No	No		XPC	high	high
				BHLHE40	No	No		CPSF1	high	high
				ELK1	No	No		WDR46	high	high
				YY1	No	No		SUGP1	high	high
				RBM14	No	No		URB1	high	high
				HMGB2	No	No		INTS1	high	high
				HMG20B	No	No		URB2	high	high
				RBBP7	No	No		TBRG1	high	high
				KLF16	No	No		DHX8	high	high
				RBBP4	No	No		CDCA7L	high	high
				NR2F2	No	No		PRR14	high	high
				TBP	No	No		FANCD2	high	high
				GATAD2A	No	No		IK	high	high
				DHX9	No	No		ZC3H18	high	high
				CDC73	No	No		TMEM209	high	high
				MYBBP1A	No	No		NOL6	high	high
				PUF60	No	No		LRWD1	high	high
				ZNF146	No	No		CPS1	high	high
				THAP11	No	No		CHAMP1	high	high
				FGF2	No	No		AFG2B	high	high
				TERF2	No	No		PUM3	high	high
				CDK9	No	No		UBN1	high	high
				HMGB1	No	No		BOP1	high	high
				DDX17	No	No		NEPRO	high	high
				BANP	No	No		KIF23	high	high
				PITX1	No	No		Nhigh155	high	high
				CEBPB	No	No		MPHOSPH10	high	high
				FOXL2	No	No		MSL1	high	high
				HNRNPU	No	No		BCL2L2	high	high
				CGGBP1	No	No		INTS4	high	high
				WDR5	No	No		HNRNPUL1	high	high
				CCDC59	No	No		NCBP3	high	high
				GTF2H4	No	No		PHC3	high	high
				MAFF	No	No		AMZ2	high	high
				ZNF326	No	No		ASXL2	high	high
				ZNF207	No	No		USP22	high	high
				SAP30BP	No	No		DDX50	high	high
				KHSRP	No	No		OGFOD3	high	high
				MAX	No	No		IPO5	high	high
				PURB	No	No		TSR1	high	high
				MTA3	No	No		ZBTB9	high	high
				RYBP	No	No		UBN2	high	high
				RING1	No	No		BAP1	high	high
				ACTR8	No	No		IWS1	high	high
				REXO4	No	No		ORC1	high	high
				TAF10	No	No		Nhigh107	high	high
				RBM39	No	No		FBXO11	high	high
				PPHLN1	No	No		BMAL1	high	high
				HDAC1	No	No		GTF3C2	high	high
				RCOR3	No	No		NUFIP1	high	high
				Nhigh62	No	No		NOL9	high	high
				TAF15	No	No		AQR	high	high
				CDK2	No	No		PKP1	high	high
				ZNF740	No	No		CDC40	high	high
				LIN9	No	No		KNL1	high	high
				SP3	No	No		GAPDHS	high	high
				GATAD1	No	No		SLC25A12	high	high
				ZMYND11	No	No		WDR76	high	high
				GNL3	No	No		UTP3	high	high
				CBX4	No	No		MYADM	high	high
				TADA1	No	No		LSM10	high	high
				MCRS1	No	No
				YEATS4	No	No
				ZMYND8	No	No
				ORC2	No	No
				MNAT1	No	No
				MRGBP	No	No
				TDP2	No	No
				RBFOX2	No	No
				RALY	No	No
				SNAI1	No	No
				TAF11	No	No
				MED25	No	No
				HDAC3	No	No
				MED18	No	No
				KAT5	No	No
				NFIC	No	No
				DDX20	No	No
				TRIM27	No	No
				SMARCD3	No	No
				MED14	No	No
				NELFB	No	No
				PPIE	No	No
				CCNH	No	No
				ZNF444	No	No
				CDK5	No	No
				SNIP1	No	No
				ANP32B	No	No
				ANP32A	No	No
				MBD3	No	No
				DNAJB1	No	No
				NELFE	No	No
				ZNF512	No	No
				TERF2IP	No	No
				CTBP1	No	No
				BRD3	No	No
				TCEA1	No	No
				CREB5	No	No
				ZNF787	No	No
				CBX8	No	No
				YEATS2	No	No
				EWSR1	No	No
				TBPL1	No	No
				YAF2	No	No
				ZKSCAN1	No	No
				MAFK	No	No
				PAXBP1	No	No
				GTF2H2	No	No
				CHAF1B	No	No
				CTBP2	No	No
				GTF2H3	No	No
				TRIP13	No	No
				BRMS1L	No	No
				RAI1	No	No
				COPS5	No	No
				UTP4	No	No
				CHEK1	No	No
				PARP1	No	No
				RSBN1L	No	No
				MCM6	No	No
				RBM10	No	No
				SEPHS1	No	No
				NACC1	No	No
				POLR2G	No	No
				RPP40	No	No
				RPF1	No	No
				PGAM1	No	No
				SPTY2D1	No	No
				PSMA1	No	No
				SMS	No	No
				RSL24D1	No	No
				IMP4	No	No
				TPX2	No	No
				MCM2	No	No
				PRPF3	No	No
				S100A4	No	No
				PABPN1	No	No
				PGLS	No	No
				EBNA1BP2	No	No
				PTMS	No	No
				ORC6	No	No
				NOL10	No	No
				PSMB1	No	No
				Nhigh54	No	No
				H1-2	No	No
				AKAP8L	No	No
				SERPINB8	No	No
				LYRM4	No	No
				DDX31	No	No
				TOP2B	No	No
				TBL3	No	No
				GLE1	No	No
				HYPK	No	No
				DCAKD	No	No
				RRS1	No	No
				DDX23	No	No
				CCDC77	No	No
				GSS	No	No
				SEC13	No	No
				FTSJ3	No	No
				DDX55	No	No
				CSE1L	No	No
				POM121	No	No
				ZC3H14	No	No
				ZC3H11A	No	No
				PRPF4B	No	No
				MSH6	No	No
				MCM5	No	No
				TSPYL1	No	No
				SKP1	No	No
				SF3A1	No	No
				Nhigh85	No	No
				EXOSC7	No	No
				UTP11	No	No
				DDX51	No	No
				PCBP1	No	No
				WDR36	No	No
				MGMT	No	No
				TNPO1	No	No
				PDS5A	No	No
				TCOF1	No	No
				UBE2N	No	No
				RANBP2	No	No
				RBM19	No	No
				RPL7A	No	No
				RBM28	No	No
				RANGAP1	No	No
				U2AF1	No	No
				NOC3L	No	No
				HUS1	No	No
				CD2BP2	No	No
				H1-5	No	No
				NOP2	No	No
				POLR2E	No	No
				ZFR	No	No
				SART1	No	No
				PSMB2	No	No
				Nhigh35	No	No
				ANLN	No	No
				GTF3C3	No	No
				HNRNPAB	No	No
				C19orf53	No	No
				GNL3L	No	No
				EMD	No	No
				SLFN5	No	No
				TMPO	No	No
				TEX10	No	No
				RPA1	No	No
				RPL22	No	No
				EFTUD2	No	No
				CIRBP	No	No
				DDX42	No	No
				MFAP1	No	No
				FIP1L1	No	No
				RAE1	No	No
				TARDBP	No	No
				UTP20	No	No
				MAEA	No	No
				FCF1	No	No
				MCM3	No	No
				RPP25	No	No
				RAB5A	No	No
				IFI16	No	No
				DDX56	No	No
				ZNF346	No	No
				RPP38	No	No
				TOP2A	No	No
				GLYR1	No	No
				SMPD4	No	No
				ADAR	No	No
				PRPF4	No	No
				HNRNPA2B1	No	No
				RAD23B	No	No
				ERH	No	No
				LEMD2	No	No
				LIG3	No	No
				BUB3	No	No
				DHX37	No	No
				NOP58	No	No
				NOP56	No	No
				POP1	No	No
				NUSAP1	No	No
				NUMA1	No	No
				HNRNPA0	No	No
				SARNP	No	No
				DNAJC9	No	No
				SRRM2	No	No
				SLX9	No	No
				PNKP	No	No
				LUC7L2	No	No
				MSH2	No	No
				PRKDC	No	No
				GTF3C4	No	No
				SRSF7	No	No
				LUC7L	No	No
				FAM32A	No	No
				TOR1AIP1	No	No
				NBN	No	No
				COIL	No	No
				TIAL1	No	No
				POLR2H	No	No
				EXOSC10	No	No
				HNRNPH3	No	No
				H1-10	No	No
				NOLC1	No	No
				SLC3A2	No	No
				SENP3	No	No
				ELAVL1	No	No
				EXOSC9	No	No
				EXOSC3	No	No
				PCNA	No	No
				POLR1F	No	No
				EIF4A3	No	No
				RCL1	No	No
				RPS19	No	No
				RNPS1	No	No
				CFAP20	No	No
				LMNB1	No	No
				PPP1CB	No	No
				HNRNPH2	No	No
				C16orf87	No	No
				PPIL3	No	No
				NOP16	No	No
				Nhigh88	No	No
				KIF22	No	No
				SNRNP200	No	No
				RTCB	No	No
				DAZAP1	No	No
				RACK1	No	No
				RBM17	No	No
				EIF6	No	No
				RFC5	No	No
				HMGN3	No	No
				SF3B3	No	No
				TKT	No	No
				SRP14	No	No
				SURF6	No	No
				FUBP3	No	No
				DCUN1D5	No	No
				RRP36	No	No
				RECQL	No	No
				DHX15	No	No
				LUC7L3	No	No
				PCID2	No	No
				RACGAP1	No	No
				SNRNP40	No	No
				RBM22	No	No
				DKC1	No	No
				ORC4	No	No
				HMGN4	No	No
				CD70	No	No
				DDX47	No	No
				FYTTD1	No	No
				ERGIC1	No	No
				RIF1	No	No
				RBM27	No	No
				PRPF8	No	No
				PTBP1	No	No
				RBM34	No	No
				GTF3C5	No	No
				PNO1	No	No
				HNRNPDL	No	No
				CPSF2	No	No
				RBM3	No	No
				SNRPA1	No	No
				CSNK1D	No	No
				SRSF1	No	No
				NAA50	No	No
				HMGN2	No	No
				KPNA4	No	No
				LLPH	No	No
				SRSF9	No	No
				ARPC2	No	No
				HNRNPA1	No	No
				RBM4	No	No
				PSMD3	No	No
				SF3A3	No	No
				C7orf50	No	No
				SNRPA	No	No
				Nhigh37	No	No
				CPSF7	No	No
				FUBP1	No	No
				HNRNPR	No	No
				USP39	No	No
				KPNA2	No	No
				RMI1	No	No
				VRK1	No	No
				SINHCAF	No	No
				DDX39A	No	No
				POLR1C	No	No
				PRPF38A	No	No
				DRG1	No	No
				SYMPK	No	No
				PTBP3	No	No
				SUMO3	No	No
				WTAP	No	No
				EEF1D	No	No
				STEAP4	No	No
				SNRPB	No	No
				NIFK	No	No
				EXOSC2	No	No
				HMCES	No	No
				KPNA1	No	No
				THOC2	No	No
				SH3BGRL3	No	No
				BICRAL	No	No
				THOC6	No	No
				C19orf47	No	No
				CPSF6	No	No
				TOE1	No	No
				KRR1	No	No
				DIMT1	No	No
				UBE2I	No	No
				CDC27	No	No
				FEN1	No	No
				NOP14	No	No
				RFC3	No	No
				SRSF3	No	No
				PPP1R10	No	No
				SF3B5	No	No
				MTREX	No	No
				GNL2	No	No
				POLDIP3	No	No
				MRE11	No	No
				MATR3	No	No
				LBR	No	No
				HNRNPF	No	No
				SRSF6	No	No
				C8orf33	No	No
				RAD18	No	No
				RFC4	No	No
				ORC5	No	No
				USP36	No	No
				CSTF1	No	No
				PCNP	No	No
				HNRNPL	No	No
				UTP18	No	No
				FBXL6	No	No
				API5	No	No
				TIA1	No	No
				HNRNPA3	No	No
				ZCCHC9	No	No
				SEC11A	No	No
				CENATAC	No	No
				CDCA5	No	No
				CUL4B	No	No
				UHRF1	No	No
				CELF1	No	No
				POP5	No	No
				RRP9	No	No
				MPG	No	No
				CSTF3	No	No
				ANXA5	No	No
				MAK16	No	No
				DUSP11	No	No
				SNRPB2	No	No
				NSA2	No	No
				GSK3A	No	No
				GAR1	No	No
				HNRNPA1L2	No	No
				UBE2M	No	No
				NOP53	No	No
				RNGTT	No	No
				HP1BP3	No	No
				PWP2	No	No
				RBM4B	No	No
				BOD1L1	No	No
				DEF6	No	No
				TPI1	No	No
				OARD1	No	No
				NT5DC1	No	No
				LIN37	No	No
				ATP6V1G1	No	No
				DDX52	No	No
				NXT1	No	No
				RPUSD3	No	No
				RNMT	No	No
				PTTG1IP	No	No
				ISG20L2	No	No
				DCAF13	No	No
				KPNB1	No	No
				EMG1	No	No
				RPRD2	No	No
				KHDRBS1	No	No
				PSMG2	No	No
				TRIP12	No	No
				TMEM201	No	No
				DDX19B	No	No
				RTRAF	No	No
				STAU2	No	No
				NOL8	No	No
				LMNA	No	No
				RFC2	No	No
				OGG1	No	No
				HNRNPM	No	No
				RCC1	No	No
				USP3	No	No
				MRTO4	No	No
				RBM26	No	No
				PSMA6	No	No
				SNRPC	No	No
				XRCC5	No	No
				Nhigh50	No	No
				ZFC3H1	No	No
				RAVER1	No	No
				WDR18	No	No
				SF3B1	No	No
				SNRNP70	No	No
				SF3B4	No	No
				PRPF31	No	No
				DCAF7	No	No
				RBM8A	No	No
				FAM98B	No	No
				KRI1	No	No
				ACIN1	No	No
				ANXA11	No	No
				SCAF11	No	No
				SPC24	No	No
				SLC1A3	No	No
				Nhigh43	No	No
				HEATR3	No	No
				LSM3	No	No
				WAPL	No	No
				SHCBP1	No	No
				DNAJB4	No	No
				TRIR	No	No
				MYPN	No	No
				SMCHD1	No	No
				U2SURP	No	No
				PWWP2A	No	No
				Nhigh133	No	No
				DUT	No	No
				SRSF5	No	No
				LSM7	No	No
				CRIP2	No	No
				MAP2K6	No	No
				PTPN2	No	No
				NTMT1	No	No
				TAX1BP3	No	No
				NOSIP	No	No
				GTF2E2	No	No
				YJU2	No	No
				PSME3	No	No
				KIN	No	No
				ERCC1	No	No
				NAV2	No	No
				RTCA	No	No
				BPNT1	No	No
				PMM2	No	No
				FBXL18	No	No
				DLST	No	No
				ZNHIT1	No	No
				ATP6V1C1	No	No
				EIF3L	No	No
				TXNL4A	No	No
				CMPK1	No	No
				ARB2A	No	No
				WDR13	No	No
				MAD2L1	No	No
				C8orf82	No	No
				POLR2C	No	No
				PGP	No	No
				PELO	No	No
				NHEJ1	No	No
				HDGFL3	No	No
				GPS1	No	No
				WDR55	No	No
				NSMCE2	No	No
				SNRNP27	No	No
				NSL1	No	No
				PPP1R8	No	No
				UBLCP1	No	No
				POLD2	No	No
				LSM8	No	No
				NAA40	No	No
				DNAJC17	No	No
				ARIH1	No	No
				SETMAR	No	No
				PCYT1A	No	No
				UGDH	No	No
				DNPH1	No	No
				STK26	No	No
				SPAST	No	No
				CBLL1	No	No
				COPS3	No	No
				UBA1	No	No
				COPS6	No	No
				FAM50A	No	No
				HNRNPLL	No	No
				PNN	No	No
				PSMD4	No	No
				CDKN2AIP	No	No
				C11orf54	No	No
				SSB	No	No
				POLE3	No	No
				SRSF11	No	No
				SGTA	No	No
				CBR1	No	No
				COPS7A	No	No
				SMNDC1	No	No
				PM20D2	No	No
				SMC1A	No	No
				RRP7A	No	No
				RBM45	No	No
				BCCIP	No	No
				RPP30	No	No
				UBFD1	No	No
				SPIN1	No	No
				NIP7	No	No
				Ahigh1	No	No
				DNAJC8	No	No
				KAT7	No	No
				RPA2	No	No
				AAAS	No	No
				PDXK	No	No
				DNAJB6	No	No
				LMNB2	No	No
				CDCA8	No	No
				ABHD14B	No	No
				DUSP23	No	No
				ZC3H8	No	No
				RAD51	No	No
				DDX19A	No	No
				YBEY	No	No
				CSTF2	No	No
				COPS4	No	No
				C2orf49	No	No
				MCM4	No	No
				SF3A2	No	No
				MCM10	No	No
				WDR3	No	No
				CHAF1A	No	No
				MDC1	No	No
				SERF2	No	No
				SRM	No	No
				Nhigh42	No	No
				ORC3	No	No
				RDH14	No	No
				PIN4	No	No
				SF3B6	No	No
				PPIL1	No	No
				NLE1	No	No
				GPKOW	No	No
				QKI	No	No
				CBX1	No	No
				NAP1L4	No	No
				C9orf78	No	No
				ZC3HC1	No	No
				RAB8A	No	No
				DHX40	No	No
				UBE2E2	No	No
				POLE4	No	No
				DCUN1D1	No	No
				PTPA	No	No
				PRIM2	No	No
				FAM76B	No	No
				PSMC3IP	No	No
				STAMBP	No	No
				FANCL	No	No
				DSN1	No	No
				ACYP2	No	No
				NABP2	No	No
				NEK7	No	No
				UCK2	No	No
				PTBP2	No	No
				NANS	No	No
				SRSF4	No	No
				OSGEP	No	No
				METTL1	No	No
				NSMCE1	No	No
				TMUB1	No	No
				PSME2	No	No
				RSRC1	No	No
				MAPK3	No	No
				OVCA2	No	No
				DYNLT1	No	No
				CTDSPL2	No	No
				RTF2	No	No
				SPRYD4	No	No
				AMMECR1	No	No
				SYF2	No	No
				NMD3	No	No
				CHRAC1	No	No
				YTHDC1	No	No
				RIOX2	No	No
				BRK1	No	No
				DNAJC7	No	No
				RAD51AP1	No	No
				ShighT16H	No	No
				FOXC2	No	No
				ERCC3	No	No
				PAXX	No	No
				GTF2F2	No	No
				TRAF4	No	No
				PRPF18	No	No
				CXXC5	No	high
				LDB1	No	high
				DDX5	No	high
				ILF2	No	high
				MYC	No	high
				TADA2B	No	high
				SIN3A	No	high
				ETV3	No	high
				RAD21	No	high
				BUD31	No	high
				PHF5A	No	high
				ELF1	No	high
				NOL11	No	high
				GSK3B	No	high
				HAT1	No	high
				KDM2A	No	high
				ZSCAN25	No	high
				PQBP1	No	high
				ING1	No	high
				NFKB1	No	high
				SAP30	No	high
				MAD2L2	No	high
				FARSB	No	high
				RBM25	No	high
				SYNCRIP	No	high
				COPS8	No	high
				WDR33	No	high
				HNRNPH1	No	high
				ACP1	No	high
				PRPF19	No	high
				NSUN5	No	high
				POLR1B	No	high
				RPL27	No	high
				PAK1IP1	No	high
				NUDT21	No	high
				GPATCH11	No	high
				ARPC3	No	high
				MGST3	No	high
				EXOSC5	No	high
				WDR25	No	high
				NAMPT	No	high
				MLH1	No	high
				C1orf174	No	high
				GRB2	No	high
				CDK2AP1	No	high
				CWC25	No	high
				CENPV	No	high
				NUF2	No	high
				TRMT1L	No	high
				POLR2L	No	high
				GTPBP4	No	high
				RPL18A	No	high
				SNRPD3	No	high
				UTP6	No	high
				PHF6	No	high
				RBMXL1	No	high
				THY1	No	high
				UBE2V1	No	high
				NUCKS1	No	high
				RBM7	No	high
				GATA2	No	high
				ARNT	No	high
				TP53BP1	No	high
				LENG8	No	high
				SRRT	No	high

## Sheet: S8
Name	PCR-Biotin-primer		Name	qPCR-primer		DNA-binding sites	primer		Gene	cDNA primer
catTFRE-1-F	TCCCCGAAAAGTGCCACCTGACGTCGAT		catTFRE-1-F	TCCCCGAAAAGTGCCACCTGACGTCGAT		1-F	TCCAAGCATCCCCTCATCACC		GAPDH-F	ACCCACTCCTCCACCTTTGAC
catTFRE-1-R	TTTTGCTGGCCTTTTGCTCACATGTGAT		catTFRE-1-R	TTTTGCTGGCCTTTTGCTCACATGTGAT		1-R	ACACCCCTCCAAGTCTCTCAC		GAPDH-R	TGTTGCTGTAGCCAAATTCGTT
catTFRE-2-F	TCCCCGAAAAGTGCCACCTGACGTCGAT		catTFRE-80-F	CCTTTCTGACTCACGTCCACA		2-F	GCCGGATTTGCCTTTTCTTCT		HOXA13-F	AAGCGCGTGCCTTATACCAA
catTFRE-2-R	TTTTGCTGGCCTTTTGCTCACATGTGAT		catTFRE-80-R	TTAGAAGAAACTGGGACCCTT		2-R	GCCAGCGCCAATAAATAAGCC		HOXA13-R	ATATCCGCCTCCGTTTGTCC
catTFRE-80-F	TCCCCGAAAAGTGCCACCTGACGTCGAT		RS-F	TTCACTGCATTCTAGTTGTGG		3-F	ACAGAAACTCCTTCTCCAGCT		HOXA10-F	AAGAGTGGTCGGAAGAAGCG
catTFRE-80-R	TTTTGCTGGCCTTTTGCTCACATGTGAT		RS-R	GTTCGGATCTCCTAGGCTCAA		3-R	GCAATTCCAAAGGTGAAAACGC		HOXA10-R	GACGCTGCGGCTAATCTCTA
RS-F	TCACGACCGAAAAGATCAAGAGCAG					4-F	GTGCCCGTCCAGCAGAAC		HOXA9-F	TAAACCTGAACCGCTGTCGG
RS-R	GTTCGGATCTCCTAGGCTCAAGCA					4-R	TGGCCACAATTAAAACAAACCCC		HOXA9-R	GCCTTCGCTGGGTTGTTTTT
						5-F	ACTGCGCCTACCTGAAGACC
						5-R	TCCTACGACCAAAACATCCCC

## Sheet: S9
TFs/cofactors’ DNA-capability enhanced by O-GlcNAcylation	TFs/cofactors’ DNA-capability inhibited by O-GlcNAcylation
ACTB	CBX2
ACTR5	SAP30L
ARGLU1
ARID2
ARID4A
ARID4B
ATF6
BAZ1A
BBX
BCLAF1
BCOR
BPTF
BRD8
C1D
CCNK
CEBPZ
CENPF
CSDE1
CTCF
CTR9
DHX36
EGR1
EHMT1
ELK3
ENY2
EPC1
EYA1
EZH2
FIZ1
FOXA1
FOXC1
FOXF2
FOXK1
FOXP1
FOXP4
GTF2B
GTF2IRD1
HCFC2
HIRA
HLTF
HMGXB4
HOXC9
INO80
INO80E
KAT2A
KAT8
KDM1B
KDM5A
KLF4
KLF5
KMT2B
L3MBTL2
LEO1
LRPPRC
MAFG
MAZ
MBD1
MED17
MED21
MED23
MED24
MEN1
MGA
MLX
MPHOSPH8
MTA1
MXI1
NFAT5
NFIB
NR3C1
NR4A1
NRF1
OGT
PAF1
PARK7
PATZ1
PBRM1
PELP1
PHF2
PHF20
PHF8
POU2F1
PRDM2
PRPF6
RBX1
RFX1
RFX2
RUNX2
S100A8
S100A9
SAFB
SAFB2
SAP130
SENP1
SETD1A
SIRT7
SIX2
SLTM
SMARCA4
SP2
SSBP3
SUPT20H
SUPT7L
TADA3
TAF1
TAF13
TAF2
TAF3
TAF5
TAF5L
TAF6L
TAF7
TBX3
TCF7L2
TEAD1
THAP3
THOC5
TPR
TRIM25
TRPS1
TRRAP
TTF1
TWIST2
TXLNG
UBTF
VEZF1
WIZ
ZBTB21
ZBTB43
ZBTB7A
ZFP64
ZFP91
ZKSCAN8
ZNF131
ZNF143
ZNF174
ZNF281
ZNF384
ZNF512B
ZNF524
ZNF579
ZNF592
ZNF639
ZNF687
ZNF768
ZSCAN26

## Sheet: S10
Gene	Log2 fold change of O-GlcNAcylation degree (O-GlcNAcylation states: low vs high)	Log2 fold change of DNA-binding capability (O-GlcNAcylation states: low vs high)
TAF5	-2.37435	-3.3949
TAF9	-1.00485	-0.218672
TAF15	-0.942724	-0.268685
TAF4B	-0.799136	-1.26162
TAF12	0.44463	0.852668
TBPL1	0.488478	0.14504
TAF9B	0.492679	0.355448
TAF6	0.82879	0.0603844
TAF4	0.861215	-0.828221
TAF11	0.969867	0.131581
TAF10	1.45245	1.50843
TBP	1.5177	0.856003
TAF8	1.62889	0.378932
TAF5L	2.89834	3.24042
TAF6L	2.9866	2.65407
TAF13	3.82622	3.12571
TAF2	3.9584	3.78395
TAF1	4.5714	3.51047
TAF3	4.75432	3.46823
TAF7	4.87524	4.16243
