# Supplementary material for: DNA Probe Pulldown Screening Uncovers O-GlcNAcylation Modulation of Transcription Factor DNA Interactions
Source: Research Square preprint supplement (doi:10.21203/rs.3.rs-5779294/v1), 2025-04-14
Supplement: Supplementary file 2 [file d1dca875a2ada30f0013bbf2.xlsx]

## Sheet: Sheet1
Dataset name	legend
S1	Left：The DNA sequences of TF response elements(TFREs). Right：The DNA sequences of RS, catTFRE-1, catTFRE-2 and catTFRE-80.
S2	Fig. 2B and C related data. "Input-NPs": nuclear proteins are identified in Input sample. "Input-TFs/Co-factors": TFs/Co-factors are identified in Input sample. "catTFRE-80-NPs": nuclear proteins are identified in catTFRE-80 sample. "catTFRE-80-TFs/Co-factors": TFs/Co-factors are identified in catTFRE-80 sample.
S3	Left: Fig. 2D related data. "LOG2-FC" refers to the log2 transformation of the NPs' fold change value (RS vs catTFRE-80). Right: Fig. 2E related data. "LOG2-FC" refers to the log2 transformation of the TFs/co-factors fold change value (RS vs catTFRE-80).
S4	Fig. 2G related data. "LOG2-FC" refers to the log2 transformation of the NPs' fold change value (OSMI-1 group vs Thiamet G group).
S5	Fig. 3A related data. "Input-The O-GlcNAc Database" refers to proteins identited in Input sample are also inclouded in The O-GlcNAc Database. "sWGA-The O-GlcNAc Database" refers to proteins identited in sWGA enrichment sample are also inclouded in The O-GlcNAc Database.
S6	Left: Fig. 3C related data. "LOG2_fold_chang_of_O-GlcNAcylation_degree_low_vs_high" refers to the log2 transformation of the NPs' O-GlcNAcylation degree fold change value (OSMI-1 treated group NPs vs Thiamet G treated group NPs). Right: Fig. 3E related data. "LOG2_fold_change_of_DNA-binding_capability_low_vs_high" refers to the log2 transformation the NPs' DNA-binding capability fold change value…
S7	Fig. 3G related data. The term "high" indicates that the degree of O-GlcNAcylation or the DNA-binding capability of the protein is significantly elevated in the Thiamet G-treated group compared to the OSMI-1 group. The term "low" indicates that the degree of O-GlcNAcylation or the DNA-binding capability of the protein is significantly reduced in the Thiamet G-treated group compared to the OSMI-1 …
S8	The DNA sequences of primers used in this study.
S9	146 TFs/cofactors’ DNA-capability enhanced by O-GlcNAcylation. 2 TFs/cofactors’ DNA-capability inhibited by O-GlcNAcylation.
S10	Transcriptional complexes associated proteins' O-GlcNAcylation degree variations and DNA-binding capability dynamics.
